# Supplementary material for: Characterization of DNA methylation reader proteins in Arabidopsis thaliana
Source: HighWire-hosted journal article supplement (doi:10.1101/gr.279379.124), 2024-12-01
Supplement: Supplemental_Table_9_.xlsx [file Supplemental_Table_9_.xlsx]

## Sheet: Supp_Table9
Supplemental Table 9. Methylation status of Arabidopsis genes
gene_ID	Methylation_status
AT1G01040	gbM
AT1G01050	gbM
AT1G01060	gbM
AT1G01150	gbM
AT1G01220	gbM
AT1G01230	gbM
AT1G01260	gbM
AT1G01320	gbM
AT1G01340	gbM
AT1G01350	gbM
AT1G01440	gbM
AT1G01450	gbM
AT1G01510	gbM
AT1G01540	gbM
AT1G01650	gbM
AT1G01660	gbM
AT1G01670	gbM
AT1G01680	gbM
AT1G01690	gbM
AT1G01710	gbM
AT1G01750	gbM
AT1G01760	gbM
AT1G01770	gbM
AT1G01790	gbM
AT1G01820	gbM
AT1G01880	gbM
AT1G01910	gbM
AT1G01920	gbM
AT1G01930	gbM
AT1G01950	gbM
AT1G01960	gbM
AT1G01970	gbM
AT1G02010	gbM
AT1G02050	gbM
AT1G02080	gbM
AT1G02100	gbM
AT1G02110	gbM
AT1G02120	gbM
AT1G02145	gbM
AT1G02260	gbM
AT1G02270	gbM
AT1G02280	gbM
AT1G02290	gbM
AT1G02305	gbM
AT1G02330	gbM
AT1G02410	gbM
AT1G02420	gbM
AT1G02430	gbM
AT1G02500	gbM
AT1G02520	gbM
AT1G02530	gbM
AT1G02560	gbM
AT1G02660	gbM
AT1G02670	gbM
AT1G02690	gbM
AT1G02750	gbM
AT1G02840	gbM
AT1G02870	gbM
AT1G02890	gbM
AT1G02910	gbM
AT1G02960	gbM
AT1G02970	gbM
AT1G02990	gbM
AT1G03000	gbM
AT1G03030	gbM
AT1G03060	gbM
AT1G03090	gbM
AT1G03100	gbM
AT1G03110	gbM
AT1G03160	gbM
AT1G03180	gbM
AT1G03190	gbM
AT1G03210	gbM
AT1G03260	gbM
AT1G03270	gbM
AT1G03280	gbM
AT1G03290	gbM
AT1G03300	gbM
AT1G03310	gbM
AT1G03360	gbM
AT1G03365	gbM
AT1G03370	gbM
AT1G03380	gbM
AT1G03457	gbM
AT1G03475	gbM
AT1G03495	gbM
AT1G03510	gbM
AT1G03520	gbM
AT1G03530	gbM
AT1G03540	gbM
AT1G03550	gbM
AT1G03560	gbM
AT1G03687	gbM
AT1G03740	gbM
AT1G03750	gbM
AT1G03770	gbM
AT1G03830	gbM
AT1G03860	gbM
AT1G03900	gbM
AT1G03905	gbM
AT1G03910	gbM
AT1G03930	gbM
AT1G03940	gbM
AT1G03960	gbM
AT1G04010	gbM
AT1G04020	gbM
AT1G04030	gbM
AT1G04050	gbM
AT1G04080	gbM
AT1G04110	gbM
AT1G04120	gbM
AT1G04130	gbM
AT1G04140	gbM
AT1G04160	gbM
AT1G04170	gbM
AT1G04190	gbM
AT1G04200	gbM
AT1G04210	gbM
AT1G04230	gbM
AT1G04300	gbM
AT1G04310	gbM
AT1G04340	gbM
AT1G04370	gbM
AT1G04390	gbM
AT1G04400	gbM
AT1G04410	gbM
AT1G04420	gbM
AT1G04430	gbM
AT1G04440	gbM
AT1G04510	gbM
AT1G04590	gbM
AT1G04600	gbM
AT1G04620	gbM
AT1G04650	gbM
AT1G04700	gbM
AT1G04710	gbM
AT1G04730	gbM
AT1G04780	gbM
AT1G04790	gbM
AT1G04810	gbM
AT1G04830	gbM
AT1G04850	gbM
AT1G04860	gbM
AT1G04870	gbM
AT1G04900	gbM
AT1G04910	gbM
AT1G04920	gbM
AT1G04930	gbM
AT1G04940	gbM
AT1G04945	gbM
AT1G04950	gbM
AT1G04960	gbM
AT1G04985	gbM
AT1G05055	gbM
AT1G05060	gbM
AT1G05070	gbM
AT1G05087	gbM
AT1G05120	gbM
AT1G05150	gbM
AT1G05160	gbM
AT1G05180	gbM
AT1G05200	gbM
AT1G05270	gbM
AT1G05360	gbM
AT1G05380	gbM
AT1G05410	gbM
AT1G05460	gbM
AT1G05470	gbM
AT1G05490	gbM
AT1G05500	gbM
AT1G05520	gbM
AT1G05570	gbM
AT1G05600	gbM
AT1G05620	gbM
AT1G05630	gbM
AT1G05640	gbM
AT1G05670	gbM
AT1G05700	gbM
AT1G05720	gbM
AT1G05750	gbM
AT1G05760	gbM
AT1G05780	gbM
AT1G05790	gbM
AT1G05830	gbM
AT1G05840	gbM
AT1G05890	gbM
AT1G05894	gbM
AT1G05900	gbM
AT1G05910	gbM
AT1G05940	gbM
AT1G05950	gbM
AT1G05960	gbM
AT1G05990	gbM
AT1G06070	gbM
AT1G06090	gbM
AT1G06110	gbM
AT1G06130	gbM
AT1G06140	gbM
AT1G06143	gbM
AT1G06150	gbM
AT1G06210	gbM
AT1G06220	gbM
AT1G06230	gbM
AT1G06240	gbM
AT1G06250	gbM
AT1G06270	gbM
AT1G06290	gbM
AT1G06390	gbM
AT1G06410	gbM
AT1G06430	gbM
AT1G06470	gbM
AT1G06490	gbM
AT1G06500	gbM
AT1G06510	gbM
AT1G06550	gbM
AT1G06560	gbM
AT1G06580	gbM
AT1G06590	gbM
AT1G06630	gbM
AT1G06670	gbM
AT1G06690	gbM
AT1G06700	gbM
AT1G06710	gbM
AT1G06720	gbM
AT1G06730	gbM
AT1G06740	gbM
AT1G06750	gbM
AT1G06770	gbM
AT1G06780	gbM
AT1G06790	gbM
AT1G06820	gbM
AT1G06840	gbM
AT1G06890	gbM
AT1G06900	gbM
AT1G06910	gbM
AT1G06950	gbM
AT1G06960	gbM
AT1G07010	gbM
AT1G07040	gbM
AT1G07110	gbM
AT1G07120	gbM
AT1G07200	gbM
AT1G07220	gbM
AT1G07290	gbM
AT1G07330	gbM
AT1G07350	gbM
AT1G07360	gbM
AT1G07380	gbM
AT1G07390	gbM
AT1G07450	gbM
AT1G07470	gbM
AT1G07476	gbM
AT1G07480	gbM
AT1G07510	gbM
AT1G07520	gbM
AT1G07530	gbM
AT1G07560	gbM
AT1G07570	gbM
AT1G07590	gbM
AT1G07615	gbM
AT1G07650	gbM
AT1G07670	gbM
AT1G07705	gbM
AT1G07710	gbM
AT1G07730	gbM
AT1G07740	gbM
AT1G07745	gbM
AT1G07780	gbM
AT1G07810	gbM
AT1G07840	gbM
AT1G07870	gbM
AT1G07880	gbM
AT1G07910	gbM
AT1G07960	gbM
AT1G07970	gbM
AT1G07990	gbM
AT1G08000	gbM
AT1G08010	gbM
AT1G08030	gbM
AT1G08040	gbM
AT1G08060	gbM
AT1G08070	gbM
AT1G08110	gbM
AT1G08125	gbM
AT1G08130	gbM
AT1G08190	gbM
AT1G08200	gbM
AT1G08210	gbM
AT1G08220	gbM
AT1G08260	gbM
AT1G08280	gbM
AT1G08300	gbM
AT1G08310	gbM
AT1G08340	gbM
AT1G08350	gbM
AT1G08370	gbM
AT1G08400	gbM
AT1G08410	gbM
AT1G08420	gbM
AT1G08450	gbM
AT1G08490	gbM
AT1G08520	gbM
AT1G08540	gbM
AT1G08550	gbM
AT1G08590	gbM
AT1G08600	gbM
AT1G08610	gbM
AT1G08620	gbM
AT1G08640	gbM
AT1G08660	gbM
AT1G08680	gbM
AT1G08720	gbM
AT1G08730	gbM
AT1G08750	gbM
AT1G08760	gbM
AT1G08780	gbM
AT1G08800	gbM
AT1G08820	gbM
AT1G08830	gbM
AT1G08840	gbM
AT1G08845	gbM
AT1G08860	gbM
AT1G08910	gbM
AT1G08920	gbM
AT1G08960	gbM
AT1G08970	gbM
AT1G09010	gbM
AT1G09020	gbM
AT1G09040	gbM
AT1G09050	gbM
AT1G09060	gbM
AT1G09080	gbM
AT1G09100	gbM
AT1G09130	gbM
AT1G09140	gbM
AT1G09150	gbM
AT1G09160	gbM
AT1G09190	gbM
AT1G09195	gbM
AT1G09220	gbM
AT1G09230	gbM
AT1G09270	gbM
AT1G09280	gbM
AT1G09290	gbM
AT1G09300	gbM
AT1G09310	gbM
AT1G09320	gbM
AT1G09410	gbM
AT1G09430	gbM
AT1G09440	gbM
AT1G09450	gbM
AT1G09460	gbM
AT1G09470	gbM
AT1G09530	gbM
AT1G09570	gbM
AT1G09600	gbM
AT1G09610	gbM
AT1G09620	gbM
AT1G09640	gbM
AT1G09660	gbM
AT1G09680	gbM
AT1G09700	gbM
AT1G09710	gbM
AT1G09730	gbM
AT1G09760	gbM
AT1G09770	gbM
AT1G09795	gbM
AT1G09800	gbM
AT1G09810	gbM
AT1G09820	gbM
AT1G09830	gbM
AT1G09840	gbM
AT1G09850	gbM
AT1G09870	gbM
AT1G09900	gbM
AT1G09910	gbM
AT1G09920	gbM
AT1G09935	gbM
AT1G09940	gbM
AT1G09960	gbM
AT1G09980	gbM
AT1G10030	gbM
AT1G10040	gbM
AT1G10050	gbM
AT1G10090	gbM
AT1G10095	gbM
AT1G10130	gbM
AT1G10150	gbM
AT1G10155	gbM
AT1G10170	gbM
AT1G10180	gbM
AT1G10210	gbM
AT1G10240	gbM
AT1G10270	gbM
AT1G10290	gbM
AT1G10300	gbM
AT1G10320	gbM
AT1G10390	gbM
AT1G10410	gbM
AT1G10417	gbM
AT1G10430	gbM
AT1G10450	gbM
AT1G10490	gbM
AT1G10510	gbM
AT1G10520	gbM
AT1G10570	gbM
AT1G10600	gbM
AT1G10660	gbM
AT1G10670	gbM
AT1G10680	gbM
AT1G10700	gbM
AT1G10720	gbM
AT1G10730	gbM
AT1G10740	gbM
AT1G10760	gbM
AT1G10780	gbM
AT1G10810	gbM
AT1G10820	gbM
AT1G10840	gbM
AT1G10850	gbM
AT1G10865	gbM
AT1G10870	gbM
AT1G10890	gbM
AT1G10900	gbM
AT1G10910	gbM
AT1G10930	gbM
AT1G10940	gbM
AT1G10950	gbM
AT1G10970	gbM
AT1G11000	gbM
AT1G11020	gbM
AT1G11050	gbM
AT1G11060	gbM
AT1G11070	gbM
AT1G11100	gbM
AT1G11130	gbM
AT1G11160	gbM
AT1G11180	gbM
AT1G11200	gbM
AT1G11290	gbM
AT1G11300	gbM
AT1G11303	gbM
AT1G11310	gbM
AT1G11330	gbM
AT1G11340	gbM
AT1G11350	gbM
AT1G11380	gbM
AT1G11390	gbM
AT1G11400	gbM
AT1G11410	gbM
AT1G11420	gbM
AT1G11430	gbM
AT1G11480	gbM
AT1G11591	gbM
AT1G11608	gbM
AT1G11650	gbM
AT1G11660	gbM
AT1G11680	gbM
AT1G11720	gbM
AT1G11750	gbM
AT1G11755	gbM
AT1G11760	gbM
AT1G11780	gbM
AT1G11790	gbM
AT1G11800	gbM
AT1G11820	gbM
AT1G11860	gbM
AT1G11870	gbM
AT1G11880	gbM
AT1G11890	gbM
AT1G11900	gbM
AT1G11905	gbM
AT1G11910	gbM
AT1G11925	gbM
AT1G11930	gbM
AT1G11940	gbM
AT1G11950	gbM
AT1G11960	gbM
AT1G12000	gbM
AT1G12050	gbM
AT1G12120	gbM
AT1G12140	gbM
AT1G12150	gbM
AT1G12160	gbM
AT1G12210	gbM
AT1G12211	gbM
AT1G12220	gbM
AT1G12230	gbM
AT1G12270	gbM
AT1G12280	gbM
AT1G12290	gbM
AT1G12300	gbM
AT1G12350	gbM
AT1G12360	gbM
AT1G12370	gbM
AT1G12390	gbM
AT1G12410	gbM
AT1G12430	gbM
AT1G12460	gbM
AT1G12470	gbM
AT1G12480	gbM
AT1G12520	gbM
AT1G12530	gbM
AT1G12580	gbM
AT1G12620	gbM
AT1G12640	gbM
AT1G12650	gbM
AT1G12680	gbM
AT1G12700	gbM
AT1G12730	gbM
AT1G12750	gbM
AT1G12770	gbM
AT1G12775	gbM
AT1G12790	gbM
AT1G12800	gbM
AT1G12820	gbM
AT1G12840	gbM
AT1G12850	gbM
AT1G12930	gbM
AT1G12950	gbM
AT1G12990	gbM
AT1G13000	gbM
AT1G13020	gbM
AT1G13030	gbM
AT1G13040	gbM
AT1G13050	gbM
AT1G13060	gbM
AT1G13120	gbM
AT1G13140	gbM
AT1G13143	gbM
AT1G13150	gbM
AT1G13160	gbM
AT1G13170	gbM
AT1G13180	gbM
AT1G13190	gbM
AT1G13195	gbM
AT1G13210	gbM
AT1G13220	gbM
AT1G13270	gbM
AT1G13310	gbM
AT1G13320	gbM
AT1G13330	gbM
AT1G13340	gbM
AT1G13350	gbM
AT1G13410	gbM
AT1G13450	gbM
AT1G13460	gbM
AT1G13480	gbM
AT1G13490	gbM
AT1G13540	gbM
AT1G13550	gbM
AT1G13560	gbM
AT1G13580	gbM
AT1G13630	gbM
AT1G13640	gbM
AT1G13700	gbM
AT1G13730	gbM
AT1G13770	gbM
AT1G13780	gbM
AT1G13790	gbM
AT1G13800	gbM
AT1G13805	gbM
AT1G13810	gbM
AT1G13820	gbM
AT1G13860	gbM
AT1G13880	gbM
AT1G13900	gbM
AT1G13910	gbM
AT1G13940	gbM
AT1G13960	gbM
AT1G13970	gbM
AT1G13980	gbM
AT1G14000	gbM
AT1G14010	gbM
AT1G14030	gbM
AT1G14040	gbM
AT1G14080	gbM
AT1G14140	gbM
AT1G14170	gbM
AT1G14180	gbM
AT1G14190	gbM
AT1G14205	gbM
AT1G14210	gbM
AT1G14230	gbM
AT1G14260	gbM
AT1G14270	gbM
AT1G14280	gbM
AT1G14290	gbM
AT1G14300	gbM
AT1G14310	gbM
AT1G14340	gbM
AT1G14370	gbM
AT1G14380	gbM
AT1G14390	gbM
AT1G14400	gbM
AT1G14460	gbM
AT1G14470	gbM
AT1G14480	gbM
AT1G14500	gbM
AT1G14510	gbM
AT1G14530	gbM
AT1G14560	gbM
AT1G14570	gbM
AT1G14590	gbM
AT1G14610	gbM
AT1G14620	gbM
AT1G14640	gbM
AT1G14650	gbM
AT1G14660	gbM
AT1G14670	gbM
AT1G14685	gbM
AT1G14688	gbM
AT1G14690	gbM
AT1G14710	gbM
AT1G14740	gbM
AT1G14770	gbM
AT1G14790	gbM
AT1G14810	gbM
AT1G14830	gbM
AT1G14840	gbM
AT1G14850	gbM
AT1G14910	gbM
AT1G14970	gbM
AT1G15020	gbM
AT1G15030	gbM
AT1G15040	gbM
AT1G15050	gbM
AT1G15060	gbM
AT1G15110	gbM
AT1G15125	gbM
AT1G15130	gbM
AT1G15150	gbM
AT1G15160	gbM
AT1G15165	gbM
AT1G15170	gbM
AT1G15180	gbM
AT1G15215	gbM
AT1G15240	gbM
AT1G15280	gbM
AT1G15290	gbM
AT1G15340	gbM
AT1G15410	gbM
AT1G15430	gbM
AT1G15440	gbM
AT1G15460	gbM
AT1G15470	gbM
AT1G15480	gbM
AT1G15490	gbM
AT1G15500	gbM
AT1G15510	gbM
AT1G15570	gbM
AT1G15660	gbM
AT1G15740	gbM
AT1G15750	gbM
AT1G15780	gbM
AT1G15880	gbM
AT1G15890	gbM
AT1G15910	gbM
AT1G15940	gbM
AT1G15970	gbM
AT1G15980	gbM
AT1G16010	gbM
AT1G16020	gbM
AT1G16070	gbM
AT1G16080	gbM
AT1G16090	gbM
AT1G16110	gbM
AT1G16130	gbM
AT1G16160	gbM
AT1G16180	gbM
AT1G16190	gbM
AT1G16220	gbM
AT1G16225	gbM
AT1G16250	gbM
AT1G16260	gbM
AT1G16270	gbM
AT1G16280	gbM
AT1G16300	gbM
AT1G16340	gbM
AT1G16350	gbM
AT1G16460	gbM
AT1G16470	gbM
AT1G16480	gbM
AT1G16520	gbM
AT1G16540	gbM
AT1G16560	gbM
AT1G16570	gbM
AT1G16610	gbM
AT1G16650	gbM
AT1G16670	gbM
AT1G16680	gbM
AT1G16690	gbM
AT1G16700	gbM
AT1G16710	gbM
AT1G16720	gbM
AT1G16750	gbM
AT1G16780	gbM
AT1G16800	gbM
AT1G16810	gbM
AT1G16825	gbM
AT1G16830	gbM
AT1G16860	gbM
AT1G16870	gbM
AT1G16900	gbM
AT1G16960	gbM
AT1G16970	gbM
AT1G17000	gbM
AT1G17040	gbM
AT1G17070	gbM
AT1G17110	gbM
AT1G17130	gbM
AT1G17145	gbM
AT1G17210	gbM
AT1G17220	gbM
AT1G17230	gbM
AT1G17250	gbM
AT1G17260	gbM
AT1G17270	gbM
AT1G17280	gbM
AT1G17290	gbM
AT1G17340	gbM
AT1G17350	gbM
AT1G17360	gbM
AT1G17370	gbM
AT1G17410	gbM
AT1G17440	gbM
AT1G17450	gbM
AT1G17460	gbM
AT1G17470	gbM
AT1G17480	gbM
AT1G17500	gbM
AT1G17520	gbM
AT1G17540	gbM
AT1G17550	gbM
AT1G17580	gbM
AT1G17600	gbM
AT1G17610	gbM
AT1G17630	gbM
AT1G17640	gbM
AT1G17650	gbM
AT1G17680	gbM
AT1G17690	gbM
AT1G17720	gbM
AT1G17750	gbM
AT1G17760	gbM
AT1G17820	gbM
AT1G17840	gbM
AT1G17850	gbM
AT1G17870	gbM
AT1G17890	gbM
AT1G17920	gbM
AT1G17930	gbM
AT1G17940	gbM
AT1G17970	gbM
AT1G17980	gbM
AT1G18030	gbM
AT1G18040	gbM
AT1G18070	gbM
AT1G18090	gbM
AT1G18150	gbM
AT1G18160	gbM
AT1G18180	gbM
AT1G18190	gbM
AT1G18260	gbM
AT1G18270	gbM
AT1G18335	gbM
AT1G18340	gbM
AT1G18370	gbM
AT1G18450	gbM
AT1G18460	gbM
AT1G18470	gbM
AT1G18480	gbM
AT1G18485	gbM
AT1G18500	gbM
AT1G18550	gbM
AT1G18560	gbM
AT1G18580	gbM
AT1G18600	gbM
AT1G18610	gbM
AT1G18620	gbM
AT1G18630	gbM
AT1G18640	gbM
AT1G18660	gbM
AT1G18670	gbM
AT1G18690	gbM
AT1G18700	gbM
AT1G18830	gbM
AT1G18840	gbM
AT1G18850	gbM
AT1G18870	gbM
AT1G18880	gbM
AT1G18890	gbM
AT1G18900	gbM
AT1G18910	gbM
AT1G18950	gbM
AT1G18990	gbM
AT1G19010	gbM
AT1G19025	gbM
AT1G19080	gbM
AT1G19100	gbM
AT1G19110	gbM
AT1G19115	gbM
AT1G19140	gbM
AT1G19170	gbM
AT1G19220	gbM
AT1G19230	gbM
AT1G19240	gbM
AT1G19270	gbM
AT1G19290	gbM
AT1G19310	gbM
AT1G19350	gbM
AT1G19360	gbM
AT1G19370	gbM
AT1G19396	gbM
AT1G19397	gbM
AT1G19430	gbM
AT1G19440	gbM
AT1G19450	gbM
AT1G19485	gbM
AT1G19490	gbM
AT1G19520	gbM
AT1G19580	gbM
AT1G19600	gbM
AT1G19650	gbM
AT1G19680	gbM
AT1G19700	gbM
AT1G19715	gbM
AT1G19720	gbM
AT1G19750	gbM
AT1G19780	gbM
AT1G19800	gbM
AT1G19835	gbM
AT1G19850	gbM
AT1G19860	gbM
AT1G19870	gbM
AT1G19880	gbM
AT1G19920	gbM
AT1G19930	gbM
AT1G19980	gbM
AT1G19990	gbM
AT1G20000	gbM
AT1G20010	gbM
AT1G20050	gbM
AT1G20060	gbM
AT1G20090	gbM
AT1G20110	gbM
AT1G20120	gbM
AT1G20160	gbM
AT1G20200	gbM
AT1G20220	gbM
AT1G20225	gbM
AT1G20230	gbM
AT1G20260	gbM
AT1G20270	gbM
AT1G20300	gbM
AT1G20370	gbM
AT1G20380	gbM
AT1G20410	gbM
AT1G20460	gbM
AT1G20470	gbM
AT1G20520	gbM
AT1G20540	gbM
AT1G20550	gbM
AT1G20560	gbM
AT1G20570	gbM
AT1G20575	gbM
AT1G20580	gbM
AT1G20590	gbM
AT1G20610	gbM
AT1G20630	gbM
AT1G20640	gbM
AT1G20650	gbM
AT1G20670	gbM
AT1G20690	gbM
AT1G20720	gbM
AT1G20750	gbM
AT1G20760	gbM
AT1G20770	gbM
AT1G20780	gbM
AT1G20830	gbM
AT1G20840	gbM
AT1G20870	gbM
AT1G20880	gbM
AT1G20890	gbM
AT1G20910	gbM
AT1G20920	gbM
AT1G20925	gbM
AT1G20930	gbM
AT1G20950	gbM
AT1G20960	gbM
AT1G20970	gbM
AT1G20980	gbM
AT1G21060	gbM
AT1G21070	gbM
AT1G21080	gbM
AT1G21100	gbM
AT1G21110	gbM
AT1G21120	gbM
AT1G21150	gbM
AT1G21160	gbM
AT1G21170	gbM
AT1G21200	gbM
AT1G21210	gbM
AT1G21240	gbM
AT1G21250	gbM
AT1G21270	gbM
AT1G21340	gbM
AT1G21350	gbM
AT1G21370	gbM
AT1G21380	gbM
AT1G21410	gbM
AT1G21440	gbM
AT1G21450	gbM
AT1G21480	gbM
AT1G21560	gbM
AT1G21580	gbM
AT1G21590	gbM
AT1G21610	gbM
AT1G21630	gbM
AT1G21640	gbM
AT1G21650	gbM
AT1G21651	gbM
AT1G21660	gbM
AT1G21690	gbM
AT1G21700	gbM
AT1G21720	gbM
AT1G21730	gbM
AT1G21740	gbM
AT1G21750	gbM
AT1G21760	gbM
AT1G21780	gbM
AT1G21790	gbM
AT1G21810	gbM
AT1G21850	gbM
AT1G21870	gbM
AT1G21880	gbM
AT1G21890	gbM
AT1G21900	gbM
AT1G21930	gbM
AT1G21980	gbM
AT1G22020	gbM
AT1G22040	gbM
AT1G22060	gbM
AT1G22070	gbM
AT1G22100	gbM
AT1G22150	gbM
AT1G22170	gbM
AT1G22200	gbM
AT1G22240	gbM
AT1G22250	gbM
AT1G22275	gbM
AT1G22290	gbM
AT1G22300	gbM
AT1G22310	gbM
AT1G22450	gbM
AT1G22460	gbM
AT1G22510	gbM
AT1G22540	gbM
AT1G22620	gbM
AT1G22660	gbM
AT1G22670	gbM
AT1G22730	gbM
AT1G22750	gbM
AT1G22770	gbM
AT1G22790	gbM
AT1G22800	gbM
AT1G22830	gbM
AT1G22850	gbM
AT1G22860	gbM
AT1G22870	gbM
AT1G22880	gbM
AT1G22920	gbM
AT1G22930	gbM
AT1G22940	gbM
AT1G22950	gbM
AT1G22960	gbM
AT1G22970	gbM
AT1G23030	gbM
AT1G23070	gbM
AT1G23170	gbM
AT1G23180	gbM
AT1G23190	gbM
AT1G23230	gbM
AT1G23260	gbM
AT1G23280	gbM
AT1G23310	gbM
AT1G23330	gbM
AT1G23360	gbM
AT1G23400	gbM
AT1G23440	gbM
AT1G23450	gbM
AT1G23460	gbM
AT1G23465	gbM
AT1G23480	gbM
AT1G23590	gbM
AT1G23690	gbM
AT1G23740	gbM
AT1G23780	gbM
AT1G23790	gbM
AT1G23800	gbM
AT1G23820	gbM
AT1G23860	gbM
AT1G23870	gbM
AT1G23880	gbM
AT1G23890	gbM
AT1G23900	gbM
AT1G23950	gbM
AT1G24030	gbM
AT1G24040	gbM
AT1G24050	gbM
AT1G24090	gbM
AT1G24095	gbM
AT1G24100	gbM
AT1G24120	gbM
AT1G24160	gbM
AT1G24180	gbM
AT1G24190	gbM
AT1G24220	gbM
AT1G24230	gbM
AT1G24240	gbM
AT1G24256	gbM
AT1G24265	gbM
AT1G24267	gbM
AT1G24280	gbM
AT1G24290	gbM
AT1G24300	gbM
AT1G24310	gbM
AT1G24320	gbM
AT1G24330	gbM
AT1G24340	gbM
AT1G24350	gbM
AT1G24360	gbM
AT1G24430	gbM
AT1G24440	gbM
AT1G24460	gbM
AT1G24490	gbM
AT1G24510	gbM
AT1G24540	gbM
AT1G24560	gbM
AT1G24570	gbM
AT1G24610	gbM
AT1G24706	gbM
AT1G24764	gbM
AT1G25270	gbM
AT1G25280	gbM
AT1G25320	gbM
AT1G25350	gbM
AT1G25360	gbM
AT1G25375	gbM
AT1G25380	gbM
AT1G25390	gbM
AT1G25420	gbM
AT1G25490	gbM
AT1G25500	gbM
AT1G25540	gbM
AT1G25570	gbM
AT1G25580	gbM
AT1G25682	gbM
AT1G26110	gbM
AT1G26130	gbM
AT1G26150	gbM
AT1G26160	gbM
AT1G26170	gbM
AT1G26180	gbM
AT1G26190	gbM
AT1G26230	gbM
AT1G26255	gbM
AT1G26260	gbM
AT1G26270	gbM
AT1G26290	gbM
AT1G26300	gbM
AT1G26330	gbM
AT1G26370	gbM
AT1G26390	gbM
AT1G26410	gbM
AT1G26440	gbM
AT1G26460	gbM
AT1G26520	gbM
AT1G26530	gbM
AT1G26540	gbM
AT1G26550	gbM
AT1G26610	gbM
AT1G26620	gbM
AT1G26640	gbM
AT1G26650	gbM
AT1G26660	gbM
AT1G26665	gbM
AT1G26670	gbM
AT1G26680	gbM
AT1G26690	gbM
AT1G26710	gbM
AT1G26730	gbM
AT1G26740	gbM
AT1G26750	gbM
AT1G26760	gbM
AT1G26761	gbM
AT1G26810	gbM
AT1G26830	gbM
AT1G26850	gbM
AT1G26900	gbM
AT1G26940	gbM
AT1G27000	gbM
AT1G27008	gbM
AT1G27070	gbM
AT1G27120	gbM
AT1G27150	gbM
AT1G27180	gbM
AT1G27190	gbM
AT1G27260	gbM
AT1G27270	gbM
AT1G27320	gbM
AT1G27340	gbM
AT1G27360	gbM
AT1G27370	gbM
AT1G27385	gbM
AT1G27390	gbM
AT1G27410	gbM
AT1G27420	gbM
AT1G27430	gbM
AT1G27440	gbM
AT1G27450	gbM
AT1G27470	gbM
AT1G27480	gbM
AT1G27500	gbM
AT1G27510	gbM
AT1G27520	gbM
AT1G27595	gbM
AT1G27630	gbM
AT1G27650	gbM
AT1G27680	gbM
AT1G27690	gbM
AT1G27700	gbM
AT1G27720	gbM
AT1G27750	gbM
AT1G27752	gbM
AT1G27770	gbM
AT1G27840	gbM
AT1G27850	gbM
AT1G27880	gbM
AT1G27900	gbM
AT1G27910	gbM
AT1G27920	gbM
AT1G27940	gbM
AT1G27960	gbM
AT1G28005	gbM
AT1G28010	gbM
AT1G28020	gbM
AT1G28040	gbM
AT1G28060	gbM
AT1G28090	gbM
AT1G28100	gbM
AT1G28110	gbM
AT1G28120	gbM
AT1G28180	gbM
AT1G28210	gbM
AT1G28220	gbM
AT1G28240	gbM
AT1G28260	gbM
AT1G28320	gbM
AT1G28340	gbM
AT1G28350	gbM
AT1G28380	gbM
AT1G28410	gbM
AT1G28420	gbM
AT1G28440	gbM
AT1G28460	gbM
AT1G28490	gbM
AT1G28510	gbM
AT1G28520	gbM
AT1G28530	gbM
AT1G28540	gbM
AT1G28550	gbM
AT1G28560	gbM
AT1G28680	gbM
AT1G28690	gbM
AT1G28700	gbM
AT1G28710	gbM
AT1G28760	gbM
AT1G28960	gbM
AT1G29000	gbM
AT1G29010	gbM
AT1G29025	gbM
AT1G29030	gbM
AT1G29060	gbM
AT1G29120	gbM
AT1G29150	gbM
AT1G29170	gbM
AT1G29179	gbM
AT1G29180	gbM
AT1G29200	gbM
AT1G29220	gbM
AT1G29230	gbM
AT1G29240	gbM
AT1G29310	gbM
AT1G29320	gbM
AT1G29330	gbM
AT1G29340	gbM
AT1G29350	gbM
AT1G29370	gbM
AT1G29380	gbM
AT1G29400	gbM
AT1G29410	gbM
AT1G29435	gbM
AT1G29440	gbM
AT1G29450	gbM
AT1G29460	gbM
AT1G29470	gbM
AT1G29480	gbM
AT1G29490	gbM
AT1G29510	gbM
AT1G29520	gbM
AT1G29535	gbM
AT1G29540	gbM
AT1G29560	gbM
AT1G29630	gbM
AT1G29690	gbM
AT1G29700	gbM
AT1G29710	gbM
AT1G29730	gbM
AT1G29740	gbM
AT1G29750	gbM
AT1G29760	gbM
AT1G29770	gbM
AT1G29775	gbM
AT1G29780	gbM
AT1G29800	gbM
AT1G29810	gbM
AT1G29820	gbM
AT1G29840	gbM
AT1G29850	gbM
AT1G29880	gbM
AT1G29890	gbM
AT1G29900	gbM
AT1G29940	gbM
AT1G29950	gbM
AT1G29970	gbM
AT1G30000	gbM
AT1G30010	gbM
AT1G30090	gbM
AT1G30130	gbM
AT1G30200	gbM
AT1G30230	gbM
AT1G30240	gbM
AT1G30270	gbM
AT1G30290	gbM
AT1G30320	gbM
AT1G30330	gbM
AT1G30360	gbM
AT1G30370	gbM
AT1G30400	gbM
AT1G30410	gbM
AT1G30420	gbM
AT1G30440	gbM
AT1G30450	gbM
AT1G30460	gbM
AT1G30470	gbM
AT1G30473	gbM
AT1G30475	gbM
AT1G30480	gbM
AT1G30490	gbM
AT1G30510	gbM
AT1G30520	gbM
AT1G30540	gbM
AT1G30545	gbM
AT1G30560	gbM
AT1G30570	gbM
AT1G30580	gbM
AT1G30590	gbM
AT1G30600	gbM
AT1G30610	gbM
AT1G30620	gbM
AT1G30630	gbM
AT1G30640	gbM
AT1G30680	gbM
AT1G30690	gbM
AT1G30755	gbM
AT1G30760	gbM
AT1G30810	gbM
AT1G30820	gbM
AT1G30825	gbM
AT1G30845	gbM
AT1G30870	gbM
AT1G30890	gbM
AT1G30910	gbM
AT1G30960	gbM
AT1G30970	gbM
AT1G31000	gbM
AT1G31010	gbM
AT1G31080	gbM
AT1G31120	gbM
AT1G31150	gbM
AT1G31175	gbM
AT1G31180	gbM
AT1G31190	gbM
AT1G31220	gbM
AT1G31230	gbM
AT1G31280	gbM
AT1G31300	gbM
AT1G31340	gbM
AT1G31360	gbM
AT1G31410	gbM
AT1G31420	gbM
AT1G31430	gbM
AT1G31440	gbM
AT1G31460	gbM
AT1G31470	gbM
AT1G31480	gbM
AT1G31490	gbM
AT1G31500	gbM
AT1G31555	gbM
AT1G31600	gbM
AT1G31620	gbM
AT1G31650	gbM
AT1G31660	gbM
AT1G31730	gbM
AT1G31770	gbM
AT1G31780	gbM
AT1G31800	gbM
AT1G31810	gbM
AT1G31814	gbM
AT1G31817	gbM
AT1G31830	gbM
AT1G31840	gbM
AT1G31850	gbM
AT1G31860	gbM
AT1G31870	gbM
AT1G31910	gbM
AT1G31920	gbM
AT1G31930	gbM
AT1G31970	gbM
AT1G32030	gbM
AT1G32050	gbM
AT1G32060	gbM
AT1G32080	gbM
AT1G32090	gbM
AT1G32120	gbM
AT1G32127	gbM
AT1G32130	gbM
AT1G32150	gbM
AT1G32160	gbM
AT1G32180	gbM
AT1G32200	gbM
AT1G32230	gbM
AT1G32250	gbM
AT1G32260	gbM
AT1G32300	gbM
AT1G32330	gbM
AT1G32340	gbM
AT1G32360	gbM
AT1G32361	gbM
AT1G32375	gbM
AT1G32380	gbM
AT1G32400	gbM
AT1G32410	gbM
AT1G32415	gbM
AT1G32420	gbM
AT1G32440	gbM
AT1G32450	gbM
AT1G32460	gbM
AT1G32470	gbM
AT1G32490	gbM
AT1G32500	gbM
AT1G32510	gbM
AT1G32520	gbM
AT1G32530	gbM
AT1G32550	gbM
AT1G32575	gbM
AT1G32585	gbM
AT1G32610	gbM
AT1G32660	gbM
AT1G32730	gbM
AT1G32750	gbM
AT1G32790	gbM
AT1G32810	gbM
AT1G32850	gbM
AT1G32870	gbM
AT1G32880	gbM
AT1G32900	gbM
AT1G32930	gbM
AT1G32940	gbM
AT1G32950	gbM
AT1G32960	gbM
AT1G32970	gbM
AT1G32980	gbM
AT1G33030	gbM
AT1G33050	gbM
AT1G33060	gbM
AT1G33230	gbM
AT1G33250	gbM
AT1G33290	gbM
AT1G33340	gbM
AT1G33350	gbM
AT1G33360	gbM
AT1G33390	gbM
AT1G33400	gbM
AT1G33410	gbM
AT1G33430	gbM
AT1G33470	gbM
AT1G33480	gbM
AT1G33490	gbM
AT1G33680	gbM
AT1G33700	gbM
AT1G33770	gbM
AT1G33780	gbM
AT1G33790	gbM
AT1G33810	gbM
AT1G33850	gbM
AT1G33890	gbM
AT1G33920	gbM
AT1G33980	gbM
AT1G33990	gbM
AT1G34020	gbM
AT1G34040	gbM
AT1G34060	gbM
AT1G34065	gbM
AT1G34110	gbM
AT1G34120	gbM
AT1G34130	gbM
AT1G34140	gbM
AT1G34150	gbM
AT1G34160	gbM
AT1G34180	gbM
AT1G34190	gbM
AT1G34210	gbM
AT1G34220	gbM
AT1G34260	gbM
AT1G34270	gbM
AT1G34300	gbM
AT1G34320	gbM
AT1G34340	gbM
AT1G34350	gbM
AT1G34355	gbM
AT1G34360	gbM
AT1G34370	gbM
AT1G34380	gbM
AT1G34420	gbM
AT1G34430	gbM
AT1G34470	gbM
AT1G34570	gbM
AT1G34630	gbM
AT1G34640	gbM
AT1G34650	gbM
AT1G34760	gbM
AT1G34770	gbM
AT1G34780	gbM
AT1G35160	gbM
AT1G35183	gbM
AT1G35190	gbM
AT1G35220	gbM
AT1G35310	gbM
AT1G35330	gbM
AT1G35340	gbM
AT1G35350	gbM
AT1G35353	gbM
AT1G35460	gbM
AT1G35470	gbM
AT1G35510	gbM
AT1G35530	gbM
AT1G35580	gbM
AT1G35620	gbM
AT1G35630	gbM
AT1G35660	gbM
AT1G35750	gbM
AT1G35880	gbM
AT1G35890	gbM
AT1G36050	gbM
AT1G36070	gbM
AT1G36160	gbM
AT1G36280	gbM
AT1G36310	gbM
AT1G36320	gbM
AT1G36370	gbM
AT1G36390	gbM
AT1G36730	gbM
AT1G36980	gbM
AT1G36990	gbM
AT1G37150	gbM
AT1G42430	gbM
AT1G42440	gbM
AT1G42470	gbM
AT1G42480	gbM
AT1G42540	gbM
AT1G42550	gbM
AT1G42960	gbM
AT1G42970	gbM
AT1G43130	gbM
AT1G43171	gbM
AT1G43190	gbM
AT1G43245	gbM
AT1G43580	gbM
AT1G43620	gbM
AT1G43650	gbM
AT1G43690	gbM
AT1G43700	gbM
AT1G43710	gbM
AT1G43850	gbM
AT1G43860	gbM
AT1G43890	gbM
AT1G43900	gbM
AT1G43910	gbM
AT1G43980	gbM
AT1G44000	gbM
AT1G44120	gbM
AT1G44224	gbM
AT1G44446	gbM
AT1G44608	gbM
AT1G44750	gbM
AT1G44770	gbM
AT1G44780	gbM
AT1G44790	gbM
AT1G44800	gbM
AT1G44820	gbM
AT1G44835	gbM
AT1G44900	gbM
AT1G44910	gbM
AT1G44940	gbM
AT1G44941	gbM
AT1G44960	gbM
AT1G45000	gbM
AT1G45050	gbM
AT1G45110	gbM
AT1G45130	gbM
AT1G45150	gbM
AT1G45160	gbM
AT1G45180	gbM
AT1G45207	gbM
AT1G45229	gbM
AT1G45230	gbM
AT1G45231	gbM
AT1G45233	gbM
AT1G45248	gbM
AT1G45249	gbM
AT1G45332	gbM
AT1G45474	gbM
AT1G45545	gbM
AT1G45616	gbM
AT1G45976	gbM
AT1G46912	gbM
AT1G47056	gbM
AT1G47210	gbM
AT1G47230	gbM
AT1G47240	gbM
AT1G47250	gbM
AT1G47260	gbM
AT1G47270	gbM
AT1G47278	gbM
AT1G47290	gbM
AT1G47317	gbM
AT1G47330	gbM
AT1G47340	gbM
AT1G47380	gbM
AT1G47420	gbM
AT1G47490	gbM
AT1G47530	gbM
AT1G47550	gbM
AT1G47560	gbM
AT1G47570	gbM
AT1G47578	gbM
AT1G47580	gbM
AT1G47640	gbM
AT1G47670	gbM
AT1G47710	gbM
AT1G47740	gbM
AT1G47780	gbM
AT1G47830	gbM
AT1G47870	gbM
AT1G47890	gbM
AT1G47900	gbM
AT1G48030	gbM
AT1G48040	gbM
AT1G48060	gbM
AT1G48090	gbM
AT1G48110	gbM
AT1G48120	gbM
AT1G48140	gbM
AT1G48160	gbM
AT1G48175	gbM
AT1G48200	gbM
AT1G48210	gbM
AT1G48220	gbM
AT1G48230	gbM
AT1G48240	gbM
AT1G48270	gbM
AT1G48310	gbM
AT1G48355	gbM
AT1G48360	gbM
AT1G48370	gbM
AT1G48380	gbM
AT1G48390	gbM
AT1G48410	gbM
AT1G48420	gbM
AT1G48430	gbM
AT1G48440	gbM
AT1G48490	gbM
AT1G48520	gbM
AT1G48540	gbM
AT1G48550	gbM
AT1G48560	gbM
AT1G48570	gbM
AT1G48580	gbM
AT1G48600	gbM
AT1G48635	gbM
AT1G48640	gbM
AT1G48650	gbM
AT1G48740	gbM
AT1G48760	gbM
AT1G48770	gbM
AT1G48780	gbM
AT1G48790	gbM
AT1G48840	gbM
AT1G48850	gbM
AT1G48860	gbM
AT1G48880	gbM
AT1G48900	gbM
AT1G48930	gbM
AT1G48950	gbM
AT1G48970	gbM
AT1G49015	gbM
AT1G49040	gbM
AT1G49050	gbM
AT1G49100	gbM
AT1G49130	gbM
AT1G49160	gbM
AT1G49170	gbM
AT1G49180	gbM
AT1G49205	gbM
AT1G49210	gbM
AT1G49220	gbM
AT1G49230	gbM
AT1G49240	gbM
AT1G49300	gbM
AT1G49340	gbM
AT1G49350	gbM
AT1G49360	gbM
AT1G49380	gbM
AT1G49390	gbM
AT1G49410	gbM
AT1G49480	gbM
AT1G49510	gbM
AT1G49530	gbM
AT1G49540	gbM
AT1G49580	gbM
AT1G49590	gbM
AT1G49600	gbM
AT1G49630	gbM
AT1G49710	gbM
AT1G49730	gbM
AT1G49740	gbM
AT1G49760	gbM
AT1G49810	gbM
AT1G49820	gbM
AT1G49880	gbM
AT1G49890	gbM
AT1G49910	gbM
AT1G49920	gbM
AT1G49940	gbM
AT1G49950	gbM
AT1G49960	gbM
AT1G49970	gbM
AT1G49980	gbM
AT1G50000	gbM
AT1G50010	gbM
AT1G50030	gbM
AT1G50090	gbM
AT1G50110	gbM
AT1G50120	gbM
AT1G50140	gbM
AT1G50170	gbM
AT1G50180	gbM
AT1G50190	gbM
AT1G50200	gbM
AT1G50240	gbM
AT1G50260	gbM
AT1G50270	gbM
AT1G50280	gbM
AT1G50300	gbM
AT1G50360	gbM
AT1G50370	gbM
AT1G50380	gbM
AT1G50400	gbM
AT1G50410	gbM
AT1G50430	gbM
AT1G50440	gbM
AT1G50450	gbM
AT1G50460	gbM
AT1G50480	gbM
AT1G50500	gbM
AT1G50510	gbM
AT1G50520	gbM
AT1G50570	gbM
AT1G50575	gbM
AT1G50580	gbM
AT1G50590	gbM
AT1G50600	gbM
AT1G50610	gbM
AT1G50620	gbM
AT1G50660	gbM
AT1G50670	gbM
AT1G50700	gbM
AT1G50710	gbM
AT1G50720	gbM
AT1G50730	gbM
AT1G50740	gbM
AT1G50745	gbM
AT1G50750	gbM
AT1G50770	gbM
AT1G50820	gbM
AT1G50840	gbM
AT1G50890	gbM
AT1G50900	gbM
AT1G50910	gbM
AT1G50920	gbM
AT1G50940	gbM
AT1G50950	gbM
AT1G50970	gbM
AT1G50990	gbM
AT1G51055	gbM
AT1G51110	gbM
AT1G51120	gbM
AT1G51130	gbM
AT1G51160	gbM
AT1G51200	gbM
AT1G51260	gbM
AT1G51310	gbM
AT1G51340	gbM
AT1G51350	gbM
AT1G51370	gbM
AT1G51380	gbM
AT1G51400	gbM
AT1G51405	gbM
AT1G51440	gbM
AT1G51450	gbM
AT1G51460	gbM
AT1G51510	gbM
AT1G51520	gbM
AT1G51540	gbM
AT1G51550	gbM
AT1G51570	gbM
AT1G51580	gbM
AT1G51590	gbM
AT1G51600	gbM
AT1G51610	gbM
AT1G51620	gbM
AT1G51630	gbM
AT1G51640	gbM
AT1G51670	gbM
AT1G51690	gbM
AT1G51710	gbM
AT1G51720	gbM
AT1G51730	gbM
AT1G51745	gbM
AT1G51760	gbM
AT1G51780	gbM
AT1G51790	gbM
AT1G51800	gbM
AT1G51805	gbM
AT1G51810	gbM
AT1G51890	gbM
AT1G51910	gbM
AT1G51940	gbM
AT1G51960	gbM
AT1G51965	gbM
AT1G51980	gbM
AT1G52040	gbM
AT1G52080	gbM
AT1G52150	gbM
AT1G52155	gbM
AT1G52160	gbM
AT1G52240	gbM
AT1G52260	gbM
AT1G52310	gbM
AT1G52315	gbM
AT1G52320	gbM
AT1G52340	gbM
AT1G52360	gbM
AT1G52370	gbM
AT1G52380	gbM
AT1G52410	gbM
AT1G52415	gbM
AT1G52420	gbM
AT1G52430	gbM
AT1G52450	gbM
AT1G52500	gbM
AT1G52510	gbM
AT1G52520	gbM
AT1G52530	gbM
AT1G52540	gbM
AT1G52570	gbM
AT1G52580	gbM
AT1G52590	gbM
AT1G52600	gbM
AT1G52620	gbM
AT1G52630	gbM
AT1G52640	gbM
AT1G52660	gbM
AT1G52670	gbM
AT1G52730	gbM
AT1G52750	gbM
AT1G52780	gbM
AT1G52790	gbM
AT1G52810	gbM
AT1G52820	gbM
AT1G52870	gbM
AT1G52910	gbM
AT1G52920	gbM
AT1G52980	gbM
AT1G53025	gbM
AT1G53040	gbM
AT1G53050	gbM
AT1G53090	gbM
AT1G53120	gbM
AT1G53140	gbM
AT1G53165	gbM
AT1G53190	gbM
AT1G53200	gbM
AT1G53210	gbM
AT1G53240	gbM
AT1G53270	gbM
AT1G53280	gbM
AT1G53290	gbM
AT1G53300	gbM
AT1G53310	gbM
AT1G53320	gbM
AT1G53330	gbM
AT1G53340	gbM
AT1G53350	gbM
AT1G53380	gbM
AT1G53390	gbM
AT1G53400	gbM
AT1G53430	gbM
AT1G53440	gbM
AT1G53450	gbM
AT1G53460	gbM
AT1G53470	gbM
AT1G53500	gbM
AT1G53510	gbM
AT1G53570	gbM
AT1G53590	gbM
AT1G53600	gbM
AT1G53645	gbM
AT1G53650	gbM
AT1G53680	gbM
AT1G53705	gbM
AT1G53710	gbM
AT1G53720	gbM
AT1G53730	gbM
AT1G53750	gbM
AT1G53770	gbM
AT1G53780	gbM
AT1G53800	gbM
AT1G53840	gbM
AT1G53850	gbM
AT1G53910	gbM
AT1G54060	gbM
AT1G54080	gbM
AT1G54090	gbM
AT1G54110	gbM
AT1G54115	gbM
AT1G54130	gbM
AT1G54140	gbM
AT1G54150	gbM
AT1G54160	gbM
AT1G54170	gbM
AT1G54180	gbM
AT1G54220	gbM
AT1G54260	gbM
AT1G54270	gbM
AT1G54280	gbM
AT1G54310	gbM
AT1G54320	gbM
AT1G54340	gbM
AT1G54350	gbM
AT1G54370	gbM
AT1G54380	gbM
AT1G54385	gbM
AT1G54390	gbM
AT1G54440	gbM
AT1G54450	gbM
AT1G54460	gbM
AT1G54470	gbM
AT1G54490	gbM
AT1G54510	gbM
AT1G54520	gbM
AT1G54530	gbM
AT1G54540	gbM
AT1G54560	gbM
AT1G54570	gbM
AT1G54590	gbM
AT1G54610	gbM
AT1G54650	gbM
AT1G54710	gbM
AT1G54770	gbM
AT1G54790	gbM
AT1G54830	gbM
AT1G54840	gbM
AT1G54850	gbM
AT1G54920	gbM
AT1G54930	gbM
AT1G54960	gbM
AT1G54990	gbM
AT1G55000	gbM
AT1G55020	gbM
AT1G55040	gbM
AT1G55050	gbM
AT1G55060	gbM
AT1G55090	gbM
AT1G55130	gbM
AT1G55140	gbM
AT1G55150	gbM
AT1G55170	gbM
AT1G55175	gbM
AT1G55180	gbM
AT1G55200	gbM
AT1G55220	gbM
AT1G55250	gbM
AT1G55270	gbM
AT1G55300	gbM
AT1G55310	gbM
AT1G55320	gbM
AT1G55325	gbM
AT1G55340	gbM
AT1G55350	gbM
AT1G55360	gbM
AT1G55390	gbM
AT1G55475	gbM
AT1G55480	gbM
AT1G55490	gbM
AT1G55500	gbM
AT1G55510	gbM
AT1G55535	gbM
AT1G55540	gbM
AT1G55560	gbM
AT1G55590	gbM
AT1G55610	gbM
AT1G55620	gbM
AT1G55680	gbM
AT1G55690	gbM
AT1G55720	gbM
AT1G55730	gbM
AT1G55740	gbM
AT1G55750	gbM
AT1G55790	gbM
AT1G55800	gbM
AT1G55803	gbM
AT1G55810	gbM
AT1G55820	gbM
AT1G55840	gbM
AT1G55850	gbM
AT1G55860	gbM
AT1G55865	gbM
AT1G55870	gbM
AT1G55880	gbM
AT1G55900	gbM
AT1G55915	gbM
AT1G55930	gbM
AT1G55940	gbM
AT1G55945	gbM
AT1G55960	gbM
AT1G55970	gbM
AT1G56000	gbM
AT1G56010	gbM
AT1G56050	gbM
AT1G56105	gbM
AT1G56110	gbM
AT1G56120	gbM
AT1G56130	gbM
AT1G56140	gbM
AT1G56145	gbM
AT1G56150	gbM
AT1G56180	gbM
AT1G56230	gbM
AT1G56260	gbM
AT1G56270	gbM
AT1G56280	gbM
AT1G56290	gbM
AT1G56300	gbM
AT1G56310	gbM
AT1G56320	gbM
AT1G56330	gbM
AT1G56340	gbM
AT1G56350	gbM
AT1G56420	gbM
AT1G56423	gbM
AT1G56430	gbM
AT1G56440	gbM
AT1G56450	gbM
AT1G56460	gbM
AT1G56500	gbM
AT1G56560	gbM
AT1G56570	gbM
AT1G56590	gbM
AT1G56690	gbM
AT1G56700	gbM
AT1G56710	gbM
AT1G56720	gbM
AT1G57590	gbM
AT1G57600	gbM
AT1G57620	gbM
[truncated: 25,445 more rows]
