# Supplementary material for: Characterization of DNA methylation reader proteins in Arabidopsis thaliana
Source: HighWire-hosted journal article supplement (doi:10.1101/gr.279379.124), 2024-12-01
Supplement: Supplemental_Table_S10.xlsx [file Supplemental_Table_S10.xlsx]

## Sheet: Emission
Supplemental Table S10. Results of the ChromHMM analysis, detailing the emission and enrichment values, the ChromHMM model parameters, and the genome segments.
state (Emission order)	MBD1	MBD2	MBD4	MBD5	MBD6	SUVH1	SUVH3	RNA	H2AKub	H3	H3K27ac	H3K27me3	H3K36me3	H3K4me1	H3K4me2	H3K4me3	H3K9me2	control	mCG	mCHG	mCHH
1	0.000558757	0.00085827	0.000912648	0.00196124	7.98117e-05	0.000707728	0.000824997	0.0298092	0.128479	0.000835958	0.00534832	0.824368	5.26765e-34	0.0289158	0.0382093	5.75344e-05	5.38048e-268	7.1004e-05	0.0528538	0.00647759	0.0340129
2	0.00201078	0.00239856	0.00228249	0.00106398	3.63548e-05	0.000398647	0.000347829	0.0440022	0.382699	0.0027954	0.0771734	0.279521	0.0063665	0.170204	0.941732	0.065608	3.27661e-281	0.000235936	0.0509605	0.0155173	0.0570164
3	0.172656	0.0769093	0.0476179	0.0131458	0.00477923	0.0154331	0.00947142	0.429541	0.768267	0.00679568	0.63248	0.13929	0.178749	0.0210642	0.827785	0.857039	7.16783e-05	0.000188497	0.0521917	0.016083	0.0654769
4	0.00474434	0.00043991	0.000414509	0.000824146	4.52733e-235	2.22307e-10	2.07877e-40	0.328733	0.40189	0.00617936	0.757744	9.48281e-05	0.979084	0.021173	1	1	0	0.000296789	0.024781	0.0115064	0.0485211
5	0.0258542	0.00977949	0.00200119	0.0015286	0.000180285	0.00112825	0.00240503	0.318147	0.160418	0.00153741	0.830494	5.48991e-05	0.661205	0.00391999	0.0895061	0.98311	0	0.000173468	0.0174763	0.0102386	0.0502654
6	0.00437622	0.00211568	0.000787748	0.0112423	0.000612765	3.66837e-152	5.60846e-05	0.20035	0.0877462	0.0022883	0.100326	0.00026228	0.945091	0.515385	0.761959	0.228884	0	9.93002e-05	0.162491	0.00770653	0.0385666
7	0.00282839	0.00942506	0.00088161	0.0352042	0.00348326	0.000123048	6.85223e-261	0.0208675	0.0054495	0.00146232	0.000352508	0.000267644	0.95464	0.975657	3.61449e-06	4.71968e-43	3.66349e-254	2.79025e-05	0.678622	0.0110833	0.0317199
8	0.0179347	0.0168262	0.00514006	0.0462117	0.0037915	0.000278748	5.96098e-176	0.871781	0.0505782	0.00407828	0.0332225	0.00023661	0.958285	0.961113	0.024417	0.0159572	0	0.000633052	0.560168	0.0114606	0.0405852
9	0.0228254	0.0170277	0.0029404	0.0155721	7.1391e-05	0.000116151	2.77877e-05	0.926437	0.0421482	0.000649956	0.0280833	0.00341001	0.00128642	0.442238	0.0155241	0.000546077	0	5.56815e-05	0.374822	0.011651	0.0442741
10	0.0926965	0.514961	0.0487356	0.779664	0.316996	0.00175328	0.00329373	0.582072	0.0277098	0.00275099	0.0338454	0.00106115	0.111203	0.732908	0.0161071	0.00670623	9.31287e-05	0.000129933	0.963639	0.0304237	0.0593999
11	0.0013557	0.00969769	0.000403285	0.0329905	0.000802472	3.33646e-05	9.11263e-06	0.0134962	0.0048137	0.000142858	0.00302724	0.000530708	0.00750591	0.716869	0.0139305	4.32533e-05	2.344e-05	6.10236e-05	0.569507	0.0106392	0.0410772
12	0.00014129	0.00248557	0.00217336	0.0794553	0.0211135	0.000304252	0.0731305	0.000286632	9.34322e-05	0.000183584	0.000184287	0.0304866	3.27331e-104	0.000203844	0.000629319	1.46775e-70	1.19987e-138	0.000116886	0.835474	0.290507	0.191988
13	0.000380329	0.000487997	0.00320398	0.0371235	0.0371821	0.000426749	0.0171102	0.00326553	4.61732e-251	1.15978e-168	2.79446e-267	0.00776879	3.72481e-278	1.22785e-58	7.8981e-05	3.72186e-05	0.0847338	2.28418e-156	0.939654	0.86624	0.770065
14	0.00306774	0.00552777	0.0170753	0.153594	0.196594	0.0120883	0.0346229	5.89595e-37	0	0.00504185	0	1.58693e-10	0	0	2.47362e-05	8.8313e-292	0.950169	0.00112903	0.965053	0.982956	0.977087
15	0.0353574	0.0326305	0.180551	0.0927482	0.238874	0.0929587	0.0876057	0.0010667	0.000231191	0.0600217	0.0034565	0.00524883	0	1.59176e-219	1.47962e-302	0	0.705661	0.190969	0.324977	0.223344	0.278353
16	0.693915	0.758141	0.929521	0.592152	0.933808	0.924649	0.822742	0.0525356	0.115351	0.311914	0.134502	0.166154	0.083068	0.107642	0.074455	0.0806004	0.761094	0.252314	0.664786	0.494698	0.538152
17	0.0390364	0.191639	0.174696	0.918592	0.955913	0.464349	0.780607	0.00240569	0.00114131	0.00324925	0.00432646	0.0552446	2.03002e-79	0.00019423	0.00439233	0.000793854	0.198903	7.75984e-05	0.958857	0.816261	0.719031
18	0.00478847	0.00705157	0.0157844	0.115881	0.167913	0.306407	0.849198	0.00026636	3.57456e-19	0.000663445	0.000255329	0.0186438	0.0013182	0.00217368	0.000641405	0.000219673	0.0786797	0.000544762	0.896795	0.816815	0.774301
19	0.00111323	0.00327215	0.00105192	5.24338e-07	3.77865e-24	9.99752e-10	0.00748311	0.00347628	0.016242	5.04106e-06	0.00699731	0.00176822	1.95074e-05	0.00341369	0.00124846	8.89783e-14	9.02871e-06	8.63193e-05	0.0119925	0.00214257	0.0214787
20	0.130379	0.133761	0.0350355	0.103416	0.0294127	0.187355	0.550198	0.023714	0.0233478	3.29812e-118	0.0586035	0.00775017	0.000564986	0.00180345	0.0128095	0.0171073	0.000368978	2.73485e-89	0.0344428	0.00418485	0.0448816

## Sheet: Overlap
Supplemental Table S10. Results of the ChromHMM analysis, detailing the emission and enrichment values, the ChromHMM model parameters, and the genome segments.
state (Emission order)	Genome %	Exon.tair10.bed.gz	Protein_Coding_Gene.tair10.bed.gz	TSS.tair10.bed.gz	TE.tair10.bed.gz	ribosomal_RNA.tair10.bed.gz	short_TE.tair10.bed.gz	long_TE.tair10.bed.gz
1	7.29794	0.90649	1.01871	1.14464	0.17738	0	0.29434	0.06242
2	4.82081	1.6086	1.59171	1.49486	0.212	0	0.18083	0.23841
3	2.29903	1.80697	1.75693	0.68984	0.09895	0	0.13424	0.06421
4	4.76592	1.47488	1.81852	0.3823	0.05164	0	0.06985	0.03324
5	2.94311	1.56095	1.72362	3.33812	0.08566	0	0.13959	0.03172
6	2.0234	1.27557	1.81552	0.21091	0.0434	0	0.05103	0.03669
7	5.36703	1.1261	1.83104	0.08403	0.02354	0	0.01643	0.02986
8	2.38514	1.27521	1.84543	0.08883	0.02137	0	0.03591	0.00675
9	4.31873	1.55499	1.83986	0.13736	0.02402	0	0.03551	0.01254
10	1.75449	1.74493	1.82708	0.11213	0.05956	0	0.04162	0.07472
11	7.13125	1.3788	1.797	0.15109	0.05575	0	0.03589	0.07287
12	5.3536	0.3271	0.30485	0.37313	2.80012	0	4.34455	1.30004
13	4.50053	0.73681	0.15181	0.27775	3.33199	0	2.52258	4.17274
14	6.79889	1.41864	0.0633	0.08592	4.35548	0	1.43525	7.18334
15	0.98383	0.74443	0.21925	0.56605	2.5124	0	1.55313	3.49325
16	0.99189	0.78602	0.26337	0.47907	2.57273	100.817	1.16935	3.98752
17	2.52128	0.56827	0.23212	0.70706	2.91939	0	3.55803	2.26917
18	2.01199	0.3857	0.15409	0.45731	3.23295	0	3.84807	2.61915
19	29.2874	0.63978	0.67678	1.88424	0.53094	0	0.95644	0.11346
20	2.44372	0.57518	0.53422	2.25042	0.83853	0	1.38548	0.30947
Base	100	47.7663	54.1193	0.02773	20.0314	0.00331	9.96228	10.419

## Sheet: Model
Supplemental Table S10. Results of the ChromHMM analysis, detailing the emission and enrichment values, the ChromHMM model parameters, and the genome segments.
20	21	E	-1.76603e+06	117
probinit	1	1.75159e-190
probinit	2	9.15011e-287
probinit	3	0
probinit	4	0
probinit	5	0
probinit	6	0
probinit	7	0
probinit	8	0
probinit	9	5.13571e-279
probinit	10	0
probinit	11	1.51717e-223
probinit	12	7.39029e-181
probinit	13	9.02389864131E-312
probinit	14	0
probinit	15	0.199535
probinit	16	0.400002
probinit	17	1.83341e-51
probinit	18	3.51083e-231
probinit	19	0.400464
probinit	20	3.23078e-114
transitionprobs	1	1	0.811659
transitionprobs	1	2	0.0270925
transitionprobs	1	3	0.000537067
transitionprobs	1	4	0
transitionprobs	1	5	0
transitionprobs	1	6	0
transitionprobs	1	7	0
transitionprobs	1	8	0
transitionprobs	1	9	0.000164571
transitionprobs	1	10	1.98034e-05
transitionprobs	1	11	0.00032729
transitionprobs	1	12	0.0118243
transitionprobs	1	13	0.000502023
transitionprobs	1	14	0
transitionprobs	1	15	2.47745e-05
transitionprobs	1	16	5.8628e-05
transitionprobs	1	17	0.00163273
transitionprobs	1	18	0.00121549
transitionprobs	1	19	0.144183
transitionprobs	1	20	0.000758651
transitionprobs	2	1	0.041465
transitionprobs	2	2	0.636983
transitionprobs	2	3	0.0433692
transitionprobs	2	4	0.0183923
transitionprobs	2	5	0.000915219
transitionprobs	2	6	0.00480185
transitionprobs	2	7	0
transitionprobs	2	8	0
transitionprobs	2	9	0.00155106
transitionprobs	2	10	0.000316152
transitionprobs	2	11	0.0302902
transitionprobs	2	12	0.00446624
transitionprobs	2	13	0.000144503
transitionprobs	2	14	0
transitionprobs	2	15	0
transitionprobs	2	16	8.81503e-05
transitionprobs	2	17	0.00139505
transitionprobs	2	18	0.000704237
transitionprobs	2	19	0.212133
transitionprobs	2	20	0.00298417
transitionprobs	3	1	0.00137428
transitionprobs	3	2	0.0887788
transitionprobs	3	3	0.682155
transitionprobs	3	4	0.0335215
transitionprobs	3	5	0.00489314
transitionprobs	3	6	3.80906e-05
transitionprobs	3	7	0
transitionprobs	3	8	0
transitionprobs	3	9	0.0182469
transitionprobs	3	10	0.00301163
transitionprobs	3	11	6.99631e-05
transitionprobs	3	12	0
transitionprobs	3	13	4.01217e-05
transitionprobs	3	14	0
transitionprobs	3	15	0
transitionprobs	3	16	0.00238138
transitionprobs	3	17	0.00267094
transitionprobs	3	18	0.000642435
transitionprobs	3	19	0.108762
transitionprobs	3	20	0.0534144
transitionprobs	4	1	0
transitionprobs	4	2	0.0199626
transitionprobs	4	3	0.0153367
transitionprobs	4	4	0.553345
transitionprobs	4	5	0.170111
transitionprobs	4	6	0.163559
transitionprobs	4	7	0.00550202
transitionprobs	4	8	0.0172527
transitionprobs	4	9	0.00195358
transitionprobs	4	10	0.000927278
transitionprobs	4	11	0
transitionprobs	4	12	0.000169441
transitionprobs	4	13	0
transitionprobs	4	14	0
transitionprobs	4	15	0
transitionprobs	4	16	0.000159241
transitionprobs	4	17	0.000155235
transitionprobs	4	18	0
transitionprobs	4	19	0.0464549
transitionprobs	4	20	0.00511067
transitionprobs	5	1	0
transitionprobs	5	2	0.00143879
transitionprobs	5	3	0.0042415
transitionprobs	5	4	0.259454
transitionprobs	5	5	0.44149
transitionprobs	5	6	0.0103181
transitionprobs	5	7	0.00125372
transitionprobs	5	8	0.0141162
transitionprobs	5	9	0.00338347
transitionprobs	5	10	0.00110041
transitionprobs	5	11	0
transitionprobs	5	12	0.00164046
transitionprobs	5	13	0
transitionprobs	5	14	0
transitionprobs	5	15	0
transitionprobs	5	16	0.000347503
transitionprobs	5	17	0.00305849
transitionprobs	5	18	0.00180306
transitionprobs	5	19	0.223532
transitionprobs	5	20	0.0328221
transitionprobs	6	1	0
transitionprobs	6	2	0.0117335
transitionprobs	6	3	0.000188304
transitionprobs	6	4	0.329009
transitionprobs	6	5	0.01281
transitionprobs	6	6	0.275865
transitionprobs	6	7	0.193747
transitionprobs	6	8	0.0915424
transitionprobs	6	9	0.0198212
transitionprobs	6	10	0.0091679
transitionprobs	6	11	0.0393334
transitionprobs	6	12	0.00012758
transitionprobs	6	13	0
transitionprobs	6	14	0
transitionprobs	6	15	0
transitionprobs	6	16	0
transitionprobs	6	17	0
transitionprobs	6	18	0
transitionprobs	6	19	0.01643
transitionprobs	6	20	0.000225044
transitionprobs	7	1	0
transitionprobs	7	2	0
transitionprobs	7	3	0
transitionprobs	7	4	0.00482524
transitionprobs	7	5	0.00059556
transitionprobs	7	6	0.0796918
transitionprobs	7	7	0.804435
transitionprobs	7	8	0.0159818
transitionprobs	7	9	0.00458441
transitionprobs	7	10	0.00818383
transitionprobs	7	11	0.0811634
transitionprobs	7	12	0
transitionprobs	7	13	0
transitionprobs	7	14	0
transitionprobs	7	15	0
transitionprobs	7	16	0
transitionprobs	7	17	0
transitionprobs	7	18	0
transitionprobs	7	19	0.00053885
transitionprobs	7	20	0
transitionprobs	8	1	0
transitionprobs	8	2	0
transitionprobs	8	3	0
transitionprobs	8	4	0.0360814
transitionprobs	8	5	0.0178336
transitionprobs	8	6	0.083003
transitionprobs	8	7	0.0350025
transitionprobs	8	8	0.674702
transitionprobs	8	9	0.123729
transitionprobs	8	10	0.0241423
transitionprobs	8	11	0.00217282
transitionprobs	8	12	0
transitionprobs	8	13	0
transitionprobs	8	14	0
transitionprobs	8	15	0
transitionprobs	8	16	0
transitionprobs	8	17	0
transitionprobs	8	18	0
transitionprobs	8	19	0.00333335
transitionprobs	8	20	0
transitionprobs	9	1	0.000216377
transitionprobs	9	2	0.00175347
transitionprobs	9	3	0.0104933
transitionprobs	9	4	0.00188226
transitionprobs	9	5	0.00295566
transitionprobs	9	6	0.0084166
transitionprobs	9	7	0.00465402
transitionprobs	9	8	0.0739019
transitionprobs	9	9	0.661024
transitionprobs	9	10	0.046223
transitionprobs	9	11	0.0410881
transitionprobs	9	12	0.00100317
transitionprobs	9	13	9.81166e-06
transitionprobs	9	14	0
transitionprobs	9	15	0
transitionprobs	9	16	0
transitionprobs	9	17	0.000322798
transitionprobs	9	18	0
transitionprobs	9	19	0.139837
transitionprobs	9	20	0.00621892
transitionprobs	10	1	0
transitionprobs	10	2	0.00111284
transitionprobs	10	3	0.00280027
transitionprobs	10	4	0.00137191
transitionprobs	10	5	0.00211728
transitionprobs	10	6	0.00825406
transitionprobs	10	7	0.0250368
transitionprobs	10	8	0.0296287
transitionprobs	10	9	0.120291
transitionprobs	10	10	0.67531
transitionprobs	10	11	0.0741911
transitionprobs	10	12	0.00409628
transitionprobs	10	13	0
transitionprobs	10	14	0
transitionprobs	10	15	0
transitionprobs	10	16	0.00173643
transitionprobs	10	17	0
transitionprobs	10	18	0
transitionprobs	10	19	0.0405661
transitionprobs	10	20	0.0134869
transitionprobs	11	1	2.44356e-05
transitionprobs	11	2	0.0191504
transitionprobs	11	3	0
transitionprobs	11	4	0
transitionprobs	11	5	0
transitionprobs	11	6	0.01115
transitionprobs	11	7	0.0606722
transitionprobs	11	8	0.000967854
transitionprobs	11	9	0.0224277
transitionprobs	11	10	0.0197233
transitionprobs	11	11	0.78325
transitionprobs	11	12	0.00152506
transitionprobs	11	13	0
transitionprobs	11	14	0
transitionprobs	11	15	0
transitionprobs	11	16	0
transitionprobs	11	17	0
transitionprobs	11	18	0
transitionprobs	11	19	0.0808758
transitionprobs	11	20	0.000232893
transitionprobs	12	1	0.0174669
transitionprobs	12	2	0.00434877
transitionprobs	12	3	7.32694e-05
transitionprobs	12	4	0.000135584
transitionprobs	12	5	0.000876706
transitionprobs	12	6	0
transitionprobs	12	7	0
transitionprobs	12	8	0
transitionprobs	12	9	0.000511507
transitionprobs	12	10	0.00136118
transitionprobs	12	11	0.00222623
transitionprobs	12	12	0.670043
transitionprobs	12	13	0.0432189
transitionprobs	12	14	0
transitionprobs	12	15	0.000250813
transitionprobs	12	16	0.000475844
transitionprobs	12	17	0.0470169
transitionprobs	12	18	0.0473614
transitionprobs	12	19	0.156522
transitionprobs	12	20	0.00811049
transitionprobs	13	1	0.000422207
transitionprobs	13	2	0.000523449
transitionprobs	13	3	0
transitionprobs	13	4	0
transitionprobs	13	5	0
transitionprobs	13	6	0
transitionprobs	13	7	0
transitionprobs	13	8	0
transitionprobs	13	9	0
transitionprobs	13	10	0
transitionprobs	13	11	0
transitionprobs	13	12	0.0523344
transitionprobs	13	13	0.810091
transitionprobs	13	14	0.0979659
transitionprobs	13	15	0.00273073
transitionprobs	13	16	0.000523533
transitionprobs	13	17	0.0112066
transitionprobs	13	18	0.0168163
transitionprobs	13	19	0.00738581
transitionprobs	13	20	0
transitionprobs	14	1	0
transitionprobs	14	2	0
transitionprobs	14	3	0
transitionprobs	14	4	0
transitionprobs	14	5	0
transitionprobs	14	6	0
transitionprobs	14	7	0
transitionprobs	14	8	0
transitionprobs	14	9	0
transitionprobs	14	10	0
transitionprobs	14	11	0
transitionprobs	14	12	0
transitionprobs	14	13	0.0645783
transitionprobs	14	14	0.900194
transitionprobs	14	15	0.00778588
transitionprobs	14	16	0.0153836
transitionprobs	14	17	0.0095673
transitionprobs	14	18	0.00245457
transitionprobs	14	19	0
transitionprobs	14	20	3.6581e-05
transitionprobs	15	1	0
transitionprobs	15	2	0
transitionprobs	15	3	0
transitionprobs	15	4	0
transitionprobs	15	5	0
transitionprobs	15	6	0
transitionprobs	15	7	0
transitionprobs	15	8	0
transitionprobs	15	9	0
transitionprobs	15	10	0
transitionprobs	15	11	0
transitionprobs	15	12	0.00140147
transitionprobs	15	13	0.0109108
transitionprobs	15	14	0.0478057
transitionprobs	15	15	0.81211
transitionprobs	15	16	0.114408
transitionprobs	15	17	0.00169225
transitionprobs	15	18	0.000772651
transitionprobs	15	19	0.00972586
transitionprobs	15	20	0.00117361
transitionprobs	16	1	2.57456e-08
transitionprobs	16	2	0.00102358
transitionprobs	16	3	0.00419355
transitionprobs	16	4	0.000324623
transitionprobs	16	5	0.00114546
transitionprobs	16	6	0.000265704
transitionprobs	16	7	0.00017295
transitionprobs	16	8	0
transitionprobs	16	9	4.63639e-05
transitionprobs	16	10	0.00196023
transitionprobs	16	11	0
transitionprobs	16	12	0.00442554
transitionprobs	16	13	0.0054366
transitionprobs	16	14	0.107231
transitionprobs	16	15	0.108333
transitionprobs	16	16	0.689115
transitionprobs	16	17	0.0323442
transitionprobs	16	18	0.0160864
transitionprobs	16	19	0.000902556
transitionprobs	16	20	0.0269924
transitionprobs	17	1	0.00543097
transitionprobs	17	2	0.0028813
transitionprobs	17	3	0.00235873
transitionprobs	17	4	0.0006668
transitionprobs	17	5	0.00370224
transitionprobs	17	6	0
transitionprobs	17	7	0
transitionprobs	17	8	0
transitionprobs	17	9	0.000522249
transitionprobs	17	10	0
transitionprobs	17	11	0
transitionprobs	17	12	0.104891
transitionprobs	17	13	0.0188483
transitionprobs	17	14	0.0240634
transitionprobs	17	15	0.00118991
transitionprobs	17	16	0.0123523
transitionprobs	17	17	0.630773
transitionprobs	17	18	0.0882389
transitionprobs	17	19	0.0303516
transitionprobs	17	20	0.0737289
transitionprobs	18	1	0.00393978
transitionprobs	18	2	0.0022763
transitionprobs	18	3	0.000725282
transitionprobs	18	4	7.27763e-05
transitionprobs	18	5	0.00216335
transitionprobs	18	6	9.6304e-05
transitionprobs	18	7	0
transitionprobs	18	8	0
transitionprobs	18	9	0.000668657
transitionprobs	18	10	0
transitionprobs	18	11	0
transitionprobs	18	12	0.12533
transitionprobs	18	13	0.0335721
transitionprobs	18	14	0.00970143
transitionprobs	18	15	0.0002007
transitionprobs	18	16	0.00680953
transitionprobs	18	17	0.102436
transitionprobs	18	18	0.601312
transitionprobs	18	19	0.047983
transitionprobs	18	20	0.0627134
transitionprobs	19	1	0.0381514
transitionprobs	19	2	0.036744
transitionprobs	19	3	0.00866939
transitionprobs	19	4	0.006932
transitionprobs	19	5	0.0243909
transitionprobs	19	6	0.00140711
transitionprobs	19	7	0
transitionprobs	19	8	0.000218144
transitionprobs	19	9	0.0212071
transitionprobs	19	10	0.00261332
transitionprobs	19	11	0.0196317
transitionprobs	19	12	0.031043
transitionprobs	19	13	0.00147429
transitionprobs	19	14	0
transitionprobs	19	15	0.000297932
transitionprobs	19	16	5.43219e-05
transitionprobs	19	17	0.00289988
transitionprobs	19	18	0.00319662
transitionprobs	19	19	0.784408
transitionprobs	19	20	0.0166614
transitionprobs	20	1	0.00145636
transitionprobs	20	2	0.00609316
transitionprobs	20	3	0.0502923
transitionprobs	20	4	0.00808276
transitionprobs	20	5	0.0384588
transitionprobs	20	6	0.000364683
transitionprobs	20	7	0
transitionprobs	20	8	0
transitionprobs	20	9	0.00922461
transitionprobs	20	10	0.00883904
transitionprobs	20	11	0
transitionprobs	20	12	0.0119863
transitionprobs	20	13	0.000409817
transitionprobs	20	14	0
transitionprobs	20	15	0.000161518
transitionprobs	20	16	0.00995967
transitionprobs	20	17	0.0694307
transitionprobs	20	18	0.0452952
transitionprobs	20	19	0.173717
transitionprobs	20	20	0.566228
emissionprobs	1	0	MBD1	0	0.999441
emissionprobs	1	0	MBD1	1	0.000558757
emissionprobs	1	1	MBD2	0	0.999142
emissionprobs	1	1	MBD2	1	0.00085827
emissionprobs	1	2	MBD4	0	0.999087
emissionprobs	1	2	MBD4	1	0.000912648
emissionprobs	1	3	MBD5	0	0.998039
emissionprobs	1	3	MBD5	1	0.00196124
emissionprobs	1	4	MBD6	0	0.99992
emissionprobs	1	4	MBD6	1	7.98117e-05
emissionprobs	1	5	SUVH1	0	0.999292
emissionprobs	1	5	SUVH1	1	0.000707728
emissionprobs	1	6	SUVH3	0	0.999175
emissionprobs	1	6	SUVH3	1	0.000824997
emissionprobs	1	7	RNA	0	0.970191
emissionprobs	1	7	RNA	1	0.0298092
emissionprobs	1	8	H2AKub	0	0.871521
emissionprobs	1	8	H2AKub	1	0.128479
emissionprobs	1	9	H3	0	0.999164
emissionprobs	1	9	H3	1	0.000835958
emissionprobs	1	10	H3K27ac	0	0.994652
emissionprobs	1	10	H3K27ac	1	0.00534832
emissionprobs	1	11	H3K27me3	0	0.175632
emissionprobs	1	11	H3K27me3	1	0.824368
emissionprobs	1	12	H3K36me3	0	1
emissionprobs	1	12	H3K36me3	1	5.26765e-34
emissionprobs	1	13	H3K4me1	0	0.971084
emissionprobs	1	13	H3K4me1	1	0.0289158
emissionprobs	1	14	H3K4me2	0	0.961791
emissionprobs	1	14	H3K4me2	1	0.0382093
emissionprobs	1	15	H3K4me3	0	0.999942
emissionprobs	1	15	H3K4me3	1	5.75344e-05
emissionprobs	1	16	H3K9me2	0	1
emissionprobs	1	16	H3K9me2	1	5.38048e-268
emissionprobs	1	17	control	0	0.999929
emissionprobs	1	17	control	1	7.1004e-05
emissionprobs	1	18	mCG	0	0.947146
emissionprobs	1	18	mCG	1	0.0528538
emissionprobs	1	19	mCHG	0	0.993522
emissionprobs	1	19	mCHG	1	0.00647759
emissionprobs	1	20	mCHH	0	0.965987
emissionprobs	1	20	mCHH	1	0.0340129
emissionprobs	2	0	MBD1	0	0.997989
emissionprobs	2	0	MBD1	1	0.00201078
emissionprobs	2	1	MBD2	0	0.997601
emissionprobs	2	1	MBD2	1	0.00239856
emissionprobs	2	2	MBD4	0	0.997718
emissionprobs	2	2	MBD4	1	0.00228249
emissionprobs	2	3	MBD5	0	0.998936
emissionprobs	2	3	MBD5	1	0.00106398
emissionprobs	2	4	MBD6	0	0.999964
emissionprobs	2	4	MBD6	1	3.63548e-05
emissionprobs	2	5	SUVH1	0	0.999601
emissionprobs	2	5	SUVH1	1	0.000398647
emissionprobs	2	6	SUVH3	0	0.999652
emissionprobs	2	6	SUVH3	1	0.000347829
emissionprobs	2	7	RNA	0	0.955998
emissionprobs	2	7	RNA	1	0.0440022
emissionprobs	2	8	H2AKub	0	0.617301
emissionprobs	2	8	H2AKub	1	0.382699
emissionprobs	2	9	H3	0	0.997205
emissionprobs	2	9	H3	1	0.0027954
emissionprobs	2	10	H3K27ac	0	0.922827
emissionprobs	2	10	H3K27ac	1	0.0771734
emissionprobs	2	11	H3K27me3	0	0.720479
emissionprobs	2	11	H3K27me3	1	0.279521
emissionprobs	2	12	H3K36me3	0	0.993634
emissionprobs	2	12	H3K36me3	1	0.0063665
emissionprobs	2	13	H3K4me1	0	0.829796
emissionprobs	2	13	H3K4me1	1	0.170204
emissionprobs	2	14	H3K4me2	0	0.0582681
emissionprobs	2	14	H3K4me2	1	0.941732
emissionprobs	2	15	H3K4me3	0	0.934392
emissionprobs	2	15	H3K4me3	1	0.065608
emissionprobs	2	16	H3K9me2	0	1
emissionprobs	2	16	H3K9me2	1	3.27661e-281
emissionprobs	2	17	control	0	0.999764
emissionprobs	2	17	control	1	0.000235936
emissionprobs	2	18	mCG	0	0.94904
emissionprobs	2	18	mCG	1	0.0509605
emissionprobs	2	19	mCHG	0	0.984483
emissionprobs	2	19	mCHG	1	0.0155173
emissionprobs	2	20	mCHH	0	0.942984
emissionprobs	2	20	mCHH	1	0.0570164
emissionprobs	3	0	MBD1	0	0.827344
emissionprobs	3	0	MBD1	1	0.172656
emissionprobs	3	1	MBD2	0	0.923091
emissionprobs	3	1	MBD2	1	0.0769093
emissionprobs	3	2	MBD4	0	0.952382
emissionprobs	3	2	MBD4	1	0.0476179
emissionprobs	3	3	MBD5	0	0.986854
emissionprobs	3	3	MBD5	1	0.0131458
emissionprobs	3	4	MBD6	0	0.995221
emissionprobs	3	4	MBD6	1	0.00477923
emissionprobs	3	5	SUVH1	0	0.984567
emissionprobs	3	5	SUVH1	1	0.0154331
emissionprobs	3	6	SUVH3	0	0.990529
emissionprobs	3	6	SUVH3	1	0.00947142
emissionprobs	3	7	RNA	0	0.570459
emissionprobs	3	7	RNA	1	0.429541
emissionprobs	3	8	H2AKub	0	0.231733
emissionprobs	3	8	H2AKub	1	0.768267
emissionprobs	3	9	H3	0	0.993204
emissionprobs	3	9	H3	1	0.00679568
emissionprobs	3	10	H3K27ac	0	0.36752
emissionprobs	3	10	H3K27ac	1	0.63248
emissionprobs	3	11	H3K27me3	0	0.86071
emissionprobs	3	11	H3K27me3	1	0.13929
emissionprobs	3	12	H3K36me3	0	0.821251
emissionprobs	3	12	H3K36me3	1	0.178749
emissionprobs	3	13	H3K4me1	0	0.978936
emissionprobs	3	13	H3K4me1	1	0.0210642
emissionprobs	3	14	H3K4me2	0	0.172215
emissionprobs	3	14	H3K4me2	1	0.827785
emissionprobs	3	15	H3K4me3	0	0.142961
emissionprobs	3	15	H3K4me3	1	0.857039
emissionprobs	3	16	H3K9me2	0	0.999928
emissionprobs	3	16	H3K9me2	1	7.16783e-05
emissionprobs	3	17	control	0	0.999812
emissionprobs	3	17	control	1	0.000188497
emissionprobs	3	18	mCG	0	0.947808
emissionprobs	3	18	mCG	1	0.0521917
emissionprobs	3	19	mCHG	0	0.983917
emissionprobs	3	19	mCHG	1	0.016083
emissionprobs	3	20	mCHH	0	0.934523
emissionprobs	3	20	mCHH	1	0.0654769
emissionprobs	4	0	MBD1	0	0.995256
emissionprobs	4	0	MBD1	1	0.00474434
emissionprobs	4	1	MBD2	0	0.99956
emissionprobs	4	1	MBD2	1	0.00043991
emissionprobs	4	2	MBD4	0	0.999585
emissionprobs	4	2	MBD4	1	0.000414509
emissionprobs	4	3	MBD5	0	0.999176
emissionprobs	4	3	MBD5	1	0.000824146
emissionprobs	4	4	MBD6	0	1
emissionprobs	4	4	MBD6	1	4.52733e-235
emissionprobs	4	5	SUVH1	0	1
emissionprobs	4	5	SUVH1	1	2.22307e-10
emissionprobs	4	6	SUVH3	0	1
emissionprobs	4	6	SUVH3	1	2.07877e-40
emissionprobs	4	7	RNA	0	0.671267
emissionprobs	4	7	RNA	1	0.328733
emissionprobs	4	8	H2AKub	0	0.59811
emissionprobs	4	8	H2AKub	1	0.40189
emissionprobs	4	9	H3	0	0.993821
emissionprobs	4	9	H3	1	0.00617936
emissionprobs	4	10	H3K27ac	0	0.242256
emissionprobs	4	10	H3K27ac	1	0.757744
emissionprobs	4	11	H3K27me3	0	0.999905
emissionprobs	4	11	H3K27me3	1	9.48281e-05
emissionprobs	4	12	H3K36me3	0	0.0209164
emissionprobs	4	12	H3K36me3	1	0.979084
emissionprobs	4	13	H3K4me1	0	0.978827
emissionprobs	4	13	H3K4me1	1	0.021173
emissionprobs	4	14	H3K4me2	0	1.22142e-09
emissionprobs	4	14	H3K4me2	1	1
emissionprobs	4	15	H3K4me3	0	3.13857e-18
emissionprobs	4	15	H3K4me3	1	1
emissionprobs	4	16	H3K9me2	0	1
emissionprobs	4	16	H3K9me2	1	0
emissionprobs	4	17	control	0	0.999703
emissionprobs	4	17	control	1	0.000296789
emissionprobs	4	18	mCG	0	0.975219
emissionprobs	4	18	mCG	1	0.024781
emissionprobs	4	19	mCHG	0	0.988494
emissionprobs	4	19	mCHG	1	0.0115064
emissionprobs	4	20	mCHH	0	0.951479
emissionprobs	4	20	mCHH	1	0.0485211
emissionprobs	5	0	MBD1	0	0.974146
emissionprobs	5	0	MBD1	1	0.0258542
emissionprobs	5	1	MBD2	0	0.990221
emissionprobs	5	1	MBD2	1	0.00977949
emissionprobs	5	2	MBD4	0	0.997999
emissionprobs	5	2	MBD4	1	0.00200119
emissionprobs	5	3	MBD5	0	0.998471
emissionprobs	5	3	MBD5	1	0.0015286
emissionprobs	5	4	MBD6	0	0.99982
emissionprobs	5	4	MBD6	1	0.000180285
emissionprobs	5	5	SUVH1	0	0.998872
emissionprobs	5	5	SUVH1	1	0.00112825
emissionprobs	5	6	SUVH3	0	0.997595
emissionprobs	5	6	SUVH3	1	0.00240503
emissionprobs	5	7	RNA	0	0.681853
emissionprobs	5	7	RNA	1	0.318147
emissionprobs	5	8	H2AKub	0	0.839582
emissionprobs	5	8	H2AKub	1	0.160418
emissionprobs	5	9	H3	0	0.998463
emissionprobs	5	9	H3	1	0.00153741
emissionprobs	5	10	H3K27ac	0	0.169506
emissionprobs	5	10	H3K27ac	1	0.830494
emissionprobs	5	11	H3K27me3	0	0.999945
emissionprobs	5	11	H3K27me3	1	5.48991e-05
emissionprobs	5	12	H3K36me3	0	0.338795
emissionprobs	5	12	H3K36me3	1	0.661205
emissionprobs	5	13	H3K4me1	0	0.99608
emissionprobs	5	13	H3K4me1	1	0.00391999
emissionprobs	5	14	H3K4me2	0	0.910494
emissionprobs	5	14	H3K4me2	1	0.0895061
emissionprobs	5	15	H3K4me3	0	0.0168901
emissionprobs	5	15	H3K4me3	1	0.98311
emissionprobs	5	16	H3K9me2	0	1
emissionprobs	5	16	H3K9me2	1	0
emissionprobs	5	17	control	0	0.999827
emissionprobs	5	17	control	1	0.000173468
emissionprobs	5	18	mCG	0	0.982524
emissionprobs	5	18	mCG	1	0.0174763
emissionprobs	5	19	mCHG	0	0.989761
emissionprobs	5	19	mCHG	1	0.0102386
emissionprobs	5	20	mCHH	0	0.949735
emissionprobs	5	20	mCHH	1	0.0502654
emissionprobs	6	0	MBD1	0	0.995624
emissionprobs	6	0	MBD1	1	0.00437622
emissionprobs	6	1	MBD2	0	0.997884
emissionprobs	6	1	MBD2	1	0.00211568
emissionprobs	6	2	MBD4	0	0.999212
emissionprobs	6	2	MBD4	1	0.000787748
emissionprobs	6	3	MBD5	0	0.988758
emissionprobs	6	3	MBD5	1	0.0112423
emissionprobs	6	4	MBD6	0	0.999387
emissionprobs	6	4	MBD6	1	0.000612765
emissionprobs	6	5	SUVH1	0	1
emissionprobs	6	5	SUVH1	1	3.66837e-152
emissionprobs	6	6	SUVH3	0	0.999944
emissionprobs	6	6	SUVH3	1	5.60846e-05
emissionprobs	6	7	RNA	0	0.79965
emissionprobs	6	7	RNA	1	0.20035
emissionprobs	6	8	H2AKub	0	0.912254
emissionprobs	6	8	H2AKub	1	0.0877462
emissionprobs	6	9	H3	0	0.997712
emissionprobs	6	9	H3	1	0.0022883
emissionprobs	6	10	H3K27ac	0	0.899674
emissionprobs	6	10	H3K27ac	1	0.100326
emissionprobs	6	11	H3K27me3	0	0.999738
emissionprobs	6	11	H3K27me3	1	0.00026228
emissionprobs	6	12	H3K36me3	0	0.0549092
emissionprobs	6	12	H3K36me3	1	0.945091
emissionprobs	6	13	H3K4me1	0	0.484615
emissionprobs	6	13	H3K4me1	1	0.515385
emissionprobs	6	14	H3K4me2	0	0.238041
emissionprobs	6	14	H3K4me2	1	0.761959
emissionprobs	6	15	H3K4me3	0	0.771116
emissionprobs	6	15	H3K4me3	1	0.228884
emissionprobs	6	16	H3K9me2	0	1
emissionprobs	6	16	H3K9me2	1	0
emissionprobs	6	17	control	0	0.999901
emissionprobs	6	17	control	1	9.93002e-05
emissionprobs	6	18	mCG	0	0.837509
emissionprobs	6	18	mCG	1	0.162491
emissionprobs	6	19	mCHG	0	0.992293
emissionprobs	6	19	mCHG	1	0.00770653
emissionprobs	6	20	mCHH	0	0.961433
emissionprobs	6	20	mCHH	1	0.0385666
emissionprobs	7	0	MBD1	0	0.997172
emissionprobs	7	0	MBD1	1	0.00282839
emissionprobs	7	1	MBD2	0	0.990575
emissionprobs	7	1	MBD2	1	0.00942506
emissionprobs	7	2	MBD4	0	0.999118
emissionprobs	7	2	MBD4	1	0.00088161
emissionprobs	7	3	MBD5	0	0.964796
emissionprobs	7	3	MBD5	1	0.0352042
emissionprobs	7	4	MBD6	0	0.996517
emissionprobs	7	4	MBD6	1	0.00348326
emissionprobs	7	5	SUVH1	0	0.999877
emissionprobs	7	5	SUVH1	1	0.000123048
emissionprobs	7	6	SUVH3	0	1
emissionprobs	7	6	SUVH3	1	6.85223e-261
emissionprobs	7	7	RNA	0	0.979132
emissionprobs	7	7	RNA	1	0.0208675
emissionprobs	7	8	H2AKub	0	0.99455
emissionprobs	7	8	H2AKub	1	0.0054495
emissionprobs	7	9	H3	0	0.998538
emissionprobs	7	9	H3	1	0.00146232
emissionprobs	7	10	H3K27ac	0	0.999647
emissionprobs	7	10	H3K27ac	1	0.000352508
emissionprobs	7	11	H3K27me3	0	0.999732
emissionprobs	7	11	H3K27me3	1	0.000267644
emissionprobs	7	12	H3K36me3	0	0.0453597
emissionprobs	7	12	H3K36me3	1	0.95464
emissionprobs	7	13	H3K4me1	0	0.0243432
emissionprobs	7	13	H3K4me1	1	0.975657
emissionprobs	7	14	H3K4me2	0	0.999996
emissionprobs	7	14	H3K4me2	1	3.61449e-06
emissionprobs	7	15	H3K4me3	0	1
emissionprobs	7	15	H3K4me3	1	4.71968e-43
emissionprobs	7	16	H3K9me2	0	1
emissionprobs	7	16	H3K9me2	1	3.66349e-254
emissionprobs	7	17	control	0	0.999972
emissionprobs	7	17	control	1	2.79025e-05
emissionprobs	7	18	mCG	0	0.321378
emissionprobs	7	18	mCG	1	0.678622
emissionprobs	7	19	mCHG	0	0.988917
emissionprobs	7	19	mCHG	1	0.0110833
emissionprobs	7	20	mCHH	0	0.96828
emissionprobs	7	20	mCHH	1	0.0317199
emissionprobs	8	0	MBD1	0	0.982065
emissionprobs	8	0	MBD1	1	0.0179347
emissionprobs	8	1	MBD2	0	0.983174
emissionprobs	8	1	MBD2	1	0.0168262
emissionprobs	8	2	MBD4	0	0.99486
emissionprobs	8	2	MBD4	1	0.00514006
emissionprobs	8	3	MBD5	0	0.953788
emissionprobs	8	3	MBD5	1	0.0462117
emissionprobs	8	4	MBD6	0	0.996209
emissionprobs	8	4	MBD6	1	0.0037915
emissionprobs	8	5	SUVH1	0	0.999721
emissionprobs	8	5	SUVH1	1	0.000278748
emissionprobs	8	6	SUVH3	0	1
emissionprobs	8	6	SUVH3	1	5.96098e-176
emissionprobs	8	7	RNA	0	0.128219
emissionprobs	8	7	RNA	1	0.871781
emissionprobs	8	8	H2AKub	0	0.949422
emissionprobs	8	8	H2AKub	1	0.0505782
emissionprobs	8	9	H3	0	0.995922
emissionprobs	8	9	H3	1	0.00407828
emissionprobs	8	10	H3K27ac	0	0.966777
emissionprobs	8	10	H3K27ac	1	0.0332225
emissionprobs	8	11	H3K27me3	0	0.999763
emissionprobs	8	11	H3K27me3	1	0.00023661
emissionprobs	8	12	H3K36me3	0	0.0417147
emissionprobs	8	12	H3K36me3	1	0.958285
emissionprobs	8	13	H3K4me1	0	0.0388865
emissionprobs	8	13	H3K4me1	1	0.961113
emissionprobs	8	14	H3K4me2	0	0.975583
emissionprobs	8	14	H3K4me2	1	0.024417
emissionprobs	8	15	H3K4me3	0	0.984043
emissionprobs	8	15	H3K4me3	1	0.0159572
emissionprobs	8	16	H3K9me2	0	1
emissionprobs	8	16	H3K9me2	1	0
emissionprobs	8	17	control	0	0.999367
emissionprobs	8	17	control	1	0.000633052
emissionprobs	8	18	mCG	0	0.439832
emissionprobs	8	18	mCG	1	0.560168
emissionprobs	8	19	mCHG	0	0.988539
emissionprobs	8	19	mCHG	1	0.0114606
emissionprobs	8	20	mCHH	0	0.959415
emissionprobs	8	20	mCHH	1	0.0405852
emissionprobs	9	0	MBD1	0	0.977175
emissionprobs	9	0	MBD1	1	0.0228254
emissionprobs	9	1	MBD2	0	0.982972
emissionprobs	9	1	MBD2	1	0.0170277
emissionprobs	9	2	MBD4	0	0.99706
emissionprobs	9	2	MBD4	1	0.0029404
emissionprobs	9	3	MBD5	0	0.984428
emissionprobs	9	3	MBD5	1	0.0155721
emissionprobs	9	4	MBD6	0	0.999929
emissionprobs	9	4	MBD6	1	7.1391e-05
emissionprobs	9	5	SUVH1	0	0.999884
emissionprobs	9	5	SUVH1	1	0.000116151
emissionprobs	9	6	SUVH3	0	0.999972
emissionprobs	9	6	SUVH3	1	2.77877e-05
emissionprobs	9	7	RNA	0	0.073563
emissionprobs	9	7	RNA	1	0.926437
emissionprobs	9	8	H2AKub	0	0.957852
emissionprobs	9	8	H2AKub	1	0.0421482
emissionprobs	9	9	H3	0	0.99935
emissionprobs	9	9	H3	1	0.000649956
emissionprobs	9	10	H3K27ac	0	0.971917
emissionprobs	9	10	H3K27ac	1	0.0280833
emissionprobs	9	11	H3K27me3	0	0.99659
emissionprobs	9	11	H3K27me3	1	0.00341001
emissionprobs	9	12	H3K36me3	0	0.998714
emissionprobs	9	12	H3K36me3	1	0.00128642
emissionprobs	9	13	H3K4me1	0	0.557762
emissionprobs	9	13	H3K4me1	1	0.442238
emissionprobs	9	14	H3K4me2	0	0.984476
emissionprobs	9	14	H3K4me2	1	0.0155241
emissionprobs	9	15	H3K4me3	0	0.999454
emissionprobs	9	15	H3K4me3	1	0.000546077
emissionprobs	9	16	H3K9me2	0	1
emissionprobs	9	16	H3K9me2	1	0
emissionprobs	9	17	control	0	0.999944
emissionprobs	9	17	control	1	5.56815e-05
emissionprobs	9	18	mCG	0	0.625178
emissionprobs	9	18	mCG	1	0.374822
emissionprobs	9	19	mCHG	0	0.988349
emissionprobs	9	19	mCHG	1	0.011651
emissionprobs	9	20	mCHH	0	0.955726
emissionprobs	9	20	mCHH	1	0.0442741
emissionprobs	10	0	MBD1	0	0.907304
emissionprobs	10	0	MBD1	1	0.0926965
emissionprobs	10	1	MBD2	0	0.485039
emissionprobs	10	1	MBD2	1	0.514961
emissionprobs	10	2	MBD4	0	0.951264
emissionprobs	10	2	MBD4	1	0.0487356
emissionprobs	10	3	MBD5	0	0.220336
emissionprobs	10	3	MBD5	1	0.779664
emissionprobs	10	4	MBD6	0	0.683004
emissionprobs	10	4	MBD6	1	0.316996
emissionprobs	10	5	SUVH1	0	0.998247
emissionprobs	10	5	SUVH1	1	0.00175328
emissionprobs	10	6	SUVH3	0	0.996706
emissionprobs	10	6	SUVH3	1	0.00329373
emissionprobs	10	7	RNA	0	0.417928
emissionprobs	10	7	RNA	1	0.582072
emissionprobs	10	8	H2AKub	0	0.97229
emissionprobs	10	8	H2AKub	1	0.0277098
emissionprobs	10	9	H3	0	0.997249
emissionprobs	10	9	H3	1	0.00275099
emissionprobs	10	10	H3K27ac	0	0.966155
emissionprobs	10	10	H3K27ac	1	0.0338454
emissionprobs	10	11	H3K27me3	0	0.998939
emissionprobs	10	11	H3K27me3	1	0.00106115
emissionprobs	10	12	H3K36me3	0	0.888797
emissionprobs	10	12	H3K36me3	1	0.111203
emissionprobs	10	13	H3K4me1	0	0.267092
emissionprobs	10	13	H3K4me1	1	0.732908
emissionprobs	10	14	H3K4me2	0	0.983893
emissionprobs	10	14	H3K4me2	1	0.0161071
emissionprobs	10	15	H3K4me3	0	0.993294
emissionprobs	10	15	H3K4me3	1	0.00670623
emissionprobs	10	16	H3K9me2	0	0.999907
emissionprobs	10	16	H3K9me2	1	9.31287e-05
emissionprobs	10	17	control	0	0.99987
emissionprobs	10	17	control	1	0.000129933
emissionprobs	10	18	mCG	0	0.0363614
emissionprobs	10	18	mCG	1	0.963639
emissionprobs	10	19	mCHG	0	0.969576
emissionprobs	10	19	mCHG	1	0.0304237
emissionprobs	10	20	mCHH	0	0.9406
emissionprobs	10	20	mCHH	1	0.0593999
emissionprobs	11	0	MBD1	0	0.998644
emissionprobs	11	0	MBD1	1	0.0013557
emissionprobs	11	1	MBD2	0	0.990302
emissionprobs	11	1	MBD2	1	0.00969769
emissionprobs	11	2	MBD4	0	0.999597
emissionprobs	11	2	MBD4	1	0.000403285
emissionprobs	11	3	MBD5	0	0.967009
emissionprobs	11	3	MBD5	1	0.0329905
emissionprobs	11	4	MBD6	0	0.999198
emissionprobs	11	4	MBD6	1	0.000802472
emissionprobs	11	5	SUVH1	0	0.999967
emissionprobs	11	5	SUVH1	1	3.33646e-05
emissionprobs	11	6	SUVH3	0	0.999991
emissionprobs	11	6	SUVH3	1	9.11263e-06
emissionprobs	11	7	RNA	0	0.986504
emissionprobs	11	7	RNA	1	0.0134962
emissionprobs	11	8	H2AKub	0	0.995186
emissionprobs	11	8	H2AKub	1	0.0048137
emissionprobs	11	9	H3	0	0.999857
emissionprobs	11	9	H3	1	0.000142858
emissionprobs	11	10	H3K27ac	0	0.996973
emissionprobs	11	10	H3K27ac	1	0.00302724
emissionprobs	11	11	H3K27me3	0	0.999469
emissionprobs	11	11	H3K27me3	1	0.000530708
emissionprobs	11	12	H3K36me3	0	0.992494
emissionprobs	11	12	H3K36me3	1	0.00750591
emissionprobs	11	13	H3K4me1	0	0.283131
emissionprobs	11	13	H3K4me1	1	0.716869
emissionprobs	11	14	H3K4me2	0	0.98607
emissionprobs	11	14	H3K4me2	1	0.0139305
emissionprobs	11	15	H3K4me3	0	0.999957
emissionprobs	11	15	H3K4me3	1	4.32533e-05
emissionprobs	11	16	H3K9me2	0	0.999977
emissionprobs	11	16	H3K9me2	1	2.344e-05
emissionprobs	11	17	control	0	0.999939
emissionprobs	11	17	control	1	6.10236e-05
emissionprobs	11	18	mCG	0	0.430493
emissionprobs	11	18	mCG	1	0.569507
emissionprobs	11	19	mCHG	0	0.989361
emissionprobs	11	19	mCHG	1	0.0106392
emissionprobs	11	20	mCHH	0	0.958923
emissionprobs	11	20	mCHH	1	0.0410772
emissionprobs	12	0	MBD1	0	0.999859
emissionprobs	12	0	MBD1	1	0.00014129
emissionprobs	12	1	MBD2	0	0.997514
emissionprobs	12	1	MBD2	1	0.00248557
emissionprobs	12	2	MBD4	0	0.997827
emissionprobs	12	2	MBD4	1	0.00217336
emissionprobs	12	3	MBD5	0	0.920545
emissionprobs	12	3	MBD5	1	0.0794553
emissionprobs	12	4	MBD6	0	0.978886
emissionprobs	12	4	MBD6	1	0.0211135
emissionprobs	12	5	SUVH1	0	0.999696
emissionprobs	12	5	SUVH1	1	0.000304252
emissionprobs	12	6	SUVH3	0	0.92687
emissionprobs	12	6	SUVH3	1	0.0731305
emissionprobs	12	7	RNA	0	0.999713
emissionprobs	12	7	RNA	1	0.000286632
emissionprobs	12	8	H2AKub	0	0.999907
emissionprobs	12	8	H2AKub	1	9.34322e-05
emissionprobs	12	9	H3	0	0.999816
emissionprobs	12	9	H3	1	0.000183584
emissionprobs	12	10	H3K27ac	0	0.999816
emissionprobs	12	10	H3K27ac	1	0.000184287
emissionprobs	12	11	H3K27me3	0	0.969513
emissionprobs	12	11	H3K27me3	1	0.0304866
emissionprobs	12	12	H3K36me3	0	1
emissionprobs	12	12	H3K36me3	1	3.27331e-104
emissionprobs	12	13	H3K4me1	0	0.999796
emissionprobs	12	13	H3K4me1	1	0.000203844
emissionprobs	12	14	H3K4me2	0	0.999371
emissionprobs	12	14	H3K4me2	1	0.000629319
emissionprobs	12	15	H3K4me3	0	1
emissionprobs	12	15	H3K4me3	1	1.46775e-70
emissionprobs	12	16	H3K9me2	0	1
emissionprobs	12	16	H3K9me2	1	1.19987e-138
emissionprobs	12	17	control	0	0.999883
emissionprobs	12	17	control	1	0.000116886
emissionprobs	12	18	mCG	0	0.164526
emissionprobs	12	18	mCG	1	0.835474
emissionprobs	12	19	mCHG	0	0.709493
emissionprobs	12	19	mCHG	1	0.290507
emissionprobs	12	20	mCHH	0	0.808012
emissionprobs	12	20	mCHH	1	0.191988
emissionprobs	13	0	MBD1	0	0.99962
emissionprobs	13	0	MBD1	1	0.000380329
emissionprobs	13	1	MBD2	0	0.999512
emissionprobs	13	1	MBD2	1	0.000487997
emissionprobs	13	2	MBD4	0	0.996796
emissionprobs	13	2	MBD4	1	0.00320398
emissionprobs	13	3	MBD5	0	0.962877
emissionprobs	13	3	MBD5	1	0.0371235
emissionprobs	13	4	MBD6	0	0.962818
emissionprobs	13	4	MBD6	1	0.0371821
emissionprobs	13	5	SUVH1	0	0.999573
emissionprobs	13	5	SUVH1	1	0.000426749
emissionprobs	13	6	SUVH3	0	0.98289
emissionprobs	13	6	SUVH3	1	0.0171102
emissionprobs	13	7	RNA	0	0.996734
emissionprobs	13	7	RNA	1	0.00326553
emissionprobs	13	8	H2AKub	0	1
emissionprobs	13	8	H2AKub	1	4.61732e-251
emissionprobs	13	9	H3	0	1
emissionprobs	13	9	H3	1	1.15978e-168
emissionprobs	13	10	H3K27ac	0	1
emissionprobs	13	10	H3K27ac	1	2.79446e-267
emissionprobs	13	11	H3K27me3	0	0.992231
emissionprobs	13	11	H3K27me3	1	0.00776879
emissionprobs	13	12	H3K36me3	0	1
emissionprobs	13	12	H3K36me3	1	3.72481e-278
emissionprobs	13	13	H3K4me1	0	1
emissionprobs	13	13	H3K4me1	1	1.22785e-58
emissionprobs	13	14	H3K4me2	0	0.999921
emissionprobs	13	14	H3K4me2	1	7.8981e-05
emissionprobs	13	15	H3K4me3	0	0.999963
emissionprobs	13	15	H3K4me3	1	3.72186e-05
emissionprobs	13	16	H3K9me2	0	0.915266
emissionprobs	13	16	H3K9me2	1	0.0847338
emissionprobs	13	17	control	0	1
emissionprobs	13	17	control	1	2.28418e-156
emissionprobs	13	18	mCG	0	0.0603463
emissionprobs	13	18	mCG	1	0.939654
emissionprobs	13	19	mCHG	0	0.13376
emissionprobs	13	19	mCHG	1	0.86624
emissionprobs	13	20	mCHH	0	0.229935
emissionprobs	13	20	mCHH	1	0.770065
emissionprobs	14	0	MBD1	0	0.996932
emissionprobs	14	0	MBD1	1	0.00306774
emissionprobs	14	1	MBD2	0	0.994472
emissionprobs	14	1	MBD2	1	0.00552777
emissionprobs	14	2	MBD4	0	0.982925
emissionprobs	14	2	MBD4	1	0.0170753
emissionprobs	14	3	MBD5	0	0.846406
emissionprobs	14	3	MBD5	1	0.153594
emissionprobs	14	4	MBD6	0	0.803406
emissionprobs	14	4	MBD6	1	0.196594
emissionprobs	14	5	SUVH1	0	0.987912
emissionprobs	14	5	SUVH1	1	0.0120883
emissionprobs	14	6	SUVH3	0	0.965377
emissionprobs	14	6	SUVH3	1	0.0346229
emissionprobs	14	7	RNA	0	1
emissionprobs	14	7	RNA	1	5.89595e-37
emissionprobs	14	8	H2AKub	0	1
emissionprobs	14	8	H2AKub	1	0
emissionprobs	14	9	H3	0	0.994958
emissionprobs	14	9	H3	1	0.00504185
emissionprobs	14	10	H3K27ac	0	1
emissionprobs	14	10	H3K27ac	1	0
emissionprobs	14	11	H3K27me3	0	1
emissionprobs	14	11	H3K27me3	1	1.58693e-10
emissionprobs	14	12	H3K36me3	0	1
emissionprobs	14	12	H3K36me3	1	0
emissionprobs	14	13	H3K4me1	0	1
emissionprobs	14	13	H3K4me1	1	0
emissionprobs	14	14	H3K4me2	0	0.999975
emissionprobs	14	14	H3K4me2	1	2.47362e-05
emissionprobs	14	15	H3K4me3	0	1
emissionprobs	14	15	H3K4me3	1	8.8313e-292
emissionprobs	14	16	H3K9me2	0	0.0498312
emissionprobs	14	16	H3K9me2	1	0.950169
emissionprobs	14	17	control	0	0.998871
emissionprobs	14	17	control	1	0.00112903
emissionprobs	14	18	mCG	0	0.0349468
emissionprobs	14	18	mCG	1	0.965053
emissionprobs	14	19	mCHG	0	0.0170438
emissionprobs	14	19	mCHG	1	0.982956
emissionprobs	14	20	mCHH	0	0.022913
emissionprobs	14	20	mCHH	1	0.977087
emissionprobs	15	0	MBD1	0	0.964643
emissionprobs	15	0	MBD1	1	0.0353574
emissionprobs	15	1	MBD2	0	0.967369
emissionprobs	15	1	MBD2	1	0.0326305
emissionprobs	15	2	MBD4	0	0.819449
emissionprobs	15	2	MBD4	1	0.180551
emissionprobs	15	3	MBD5	0	0.907252
emissionprobs	15	3	MBD5	1	0.0927482
emissionprobs	15	4	MBD6	0	0.761126
emissionprobs	15	4	MBD6	1	0.238874
emissionprobs	15	5	SUVH1	0	0.907041
emissionprobs	15	5	SUVH1	1	0.0929587
emissionprobs	15	6	SUVH3	0	0.912394
emissionprobs	15	6	SUVH3	1	0.0876057
emissionprobs	15	7	RNA	0	0.998933
emissionprobs	15	7	RNA	1	0.0010667
emissionprobs	15	8	H2AKub	0	0.999769
emissionprobs	15	8	H2AKub	1	0.000231191
emissionprobs	15	9	H3	0	0.939978
emissionprobs	15	9	H3	1	0.0600217
emissionprobs	15	10	H3K27ac	0	0.996544
emissionprobs	15	10	H3K27ac	1	0.0034565
emissionprobs	15	11	H3K27me3	0	0.994751
emissionprobs	15	11	H3K27me3	1	0.00524883
emissionprobs	15	12	H3K36me3	0	1
emissionprobs	15	12	H3K36me3	1	0
emissionprobs	15	13	H3K4me1	0	1
emissionprobs	15	13	H3K4me1	1	1.59176e-219
emissionprobs	15	14	H3K4me2	0	1
emissionprobs	15	14	H3K4me2	1	1.47962e-302
emissionprobs	15	15	H3K4me3	0	1
emissionprobs	15	15	H3K4me3	1	0
emissionprobs	15	16	H3K9me2	0	0.294339
emissionprobs	15	16	H3K9me2	1	0.705661
emissionprobs	15	17	control	0	0.809031
emissionprobs	15	17	control	1	0.190969
emissionprobs	15	18	mCG	0	0.675023
emissionprobs	15	18	mCG	1	0.324977
emissionprobs	15	19	mCHG	0	0.776656
emissionprobs	15	19	mCHG	1	0.223344
emissionprobs	15	20	mCHH	0	0.721647
emissionprobs	15	20	mCHH	1	0.278353
emissionprobs	16	0	MBD1	0	0.306085
emissionprobs	16	0	MBD1	1	0.693915
emissionprobs	16	1	MBD2	0	0.241859
emissionprobs	16	1	MBD2	1	0.758141
emissionprobs	16	2	MBD4	0	0.0704788
emissionprobs	16	2	MBD4	1	0.929521
emissionprobs	16	3	MBD5	0	0.407848
emissionprobs	16	3	MBD5	1	0.592152
emissionprobs	16	4	MBD6	0	0.0661916
emissionprobs	16	4	MBD6	1	0.933808
emissionprobs	16	5	SUVH1	0	0.0753508
emissionprobs	16	5	SUVH1	1	0.924649
emissionprobs	16	6	SUVH3	0	0.177258
emissionprobs	16	6	SUVH3	1	0.822742
emissionprobs	16	7	RNA	0	0.947464
emissionprobs	16	7	RNA	1	0.0525356
emissionprobs	16	8	H2AKub	0	0.884649
emissionprobs	16	8	H2AKub	1	0.115351
emissionprobs	16	9	H3	0	0.688086
emissionprobs	16	9	H3	1	0.311914
emissionprobs	16	10	H3K27ac	0	0.865498
emissionprobs	16	10	H3K27ac	1	0.134502
emissionprobs	16	11	H3K27me3	0	0.833846
emissionprobs	16	11	H3K27me3	1	0.166154
emissionprobs	16	12	H3K36me3	0	0.916932
emissionprobs	16	12	H3K36me3	1	0.083068
emissionprobs	16	13	H3K4me1	0	0.892358
emissionprobs	16	13	H3K4me1	1	0.107642
emissionprobs	16	14	H3K4me2	0	0.925545
emissionprobs	16	14	H3K4me2	1	0.074455
emissionprobs	16	15	H3K4me3	0	0.9194
emissionprobs	16	15	H3K4me3	1	0.0806004
emissionprobs	16	16	H3K9me2	0	0.238906
emissionprobs	16	16	H3K9me2	1	0.761094
emissionprobs	16	17	control	0	0.747686
emissionprobs	16	17	control	1	0.252314
emissionprobs	16	18	mCG	0	0.335214
emissionprobs	16	18	mCG	1	0.664786
emissionprobs	16	19	mCHG	0	0.505302
emissionprobs	16	19	mCHG	1	0.494698
emissionprobs	16	20	mCHH	0	0.461848
emissionprobs	16	20	mCHH	1	0.538152
emissionprobs	17	0	MBD1	0	0.960964
emissionprobs	17	0	MBD1	1	0.0390364
emissionprobs	17	1	MBD2	0	0.808361
emissionprobs	17	1	MBD2	1	0.191639
emissionprobs	17	2	MBD4	0	0.825304
emissionprobs	17	2	MBD4	1	0.174696
emissionprobs	17	3	MBD5	0	0.0814075
emissionprobs	17	3	MBD5	1	0.918592
emissionprobs	17	4	MBD6	0	0.0440869
emissionprobs	17	4	MBD6	1	0.955913
emissionprobs	17	5	SUVH1	0	0.535651
emissionprobs	17	5	SUVH1	1	0.464349
emissionprobs	17	6	SUVH3	0	0.219393
emissionprobs	17	6	SUVH3	1	0.780607
emissionprobs	17	7	RNA	0	0.997594
emissionprobs	17	7	RNA	1	0.00240569
emissionprobs	17	8	H2AKub	0	0.998859
emissionprobs	17	8	H2AKub	1	0.00114131
emissionprobs	17	9	H3	0	0.996751
emissionprobs	17	9	H3	1	0.00324925
emissionprobs	17	10	H3K27ac	0	0.995674
emissionprobs	17	10	H3K27ac	1	0.00432646
emissionprobs	17	11	H3K27me3	0	0.944755
emissionprobs	17	11	H3K27me3	1	0.0552446
emissionprobs	17	12	H3K36me3	0	1
emissionprobs	17	12	H3K36me3	1	2.03002e-79
emissionprobs	17	13	H3K4me1	0	0.999806
emissionprobs	17	13	H3K4me1	1	0.00019423
emissionprobs	17	14	H3K4me2	0	0.995608
emissionprobs	17	14	H3K4me2	1	0.00439233
emissionprobs	17	15	H3K4me3	0	0.999206
emissionprobs	17	15	H3K4me3	1	0.000793854
emissionprobs	17	16	H3K9me2	0	0.801097
emissionprobs	17	16	H3K9me2	1	0.198903
emissionprobs	17	17	control	0	0.999922
emissionprobs	17	17	control	1	7.75984e-05
emissionprobs	17	18	mCG	0	0.0411426
emissionprobs	17	18	mCG	1	0.958857
emissionprobs	17	19	mCHG	0	0.183739
emissionprobs	17	19	mCHG	1	0.816261
emissionprobs	17	20	mCHH	0	0.280969
emissionprobs	17	20	mCHH	1	0.719031
emissionprobs	18	0	MBD1	0	0.995212
emissionprobs	18	0	MBD1	1	0.00478847
emissionprobs	18	1	MBD2	0	0.992948
emissionprobs	18	1	MBD2	1	0.00705157
emissionprobs	18	2	MBD4	0	0.984216
emissionprobs	18	2	MBD4	1	0.0157844
emissionprobs	18	3	MBD5	0	0.884119
emissionprobs	18	3	MBD5	1	0.115881
emissionprobs	18	4	MBD6	0	0.832087
emissionprobs	18	4	MBD6	1	0.167913
emissionprobs	18	5	SUVH1	0	0.693593
emissionprobs	18	5	SUVH1	1	0.306407
emissionprobs	18	6	SUVH3	0	0.150802
emissionprobs	18	6	SUVH3	1	0.849198
emissionprobs	18	7	RNA	0	0.999734
emissionprobs	18	7	RNA	1	0.00026636
emissionprobs	18	8	H2AKub	0	1
emissionprobs	18	8	H2AKub	1	3.57456e-19
emissionprobs	18	9	H3	0	0.999337
emissionprobs	18	9	H3	1	0.000663445
emissionprobs	18	10	H3K27ac	0	0.999745
emissionprobs	18	10	H3K27ac	1	0.000255329
emissionprobs	18	11	H3K27me3	0	0.981356
emissionprobs	18	11	H3K27me3	1	0.0186438
emissionprobs	18	12	H3K36me3	0	0.998682
emissionprobs	18	12	H3K36me3	1	0.0013182
emissionprobs	18	13	H3K4me1	0	0.997826
emissionprobs	18	13	H3K4me1	1	0.00217368
emissionprobs	18	14	H3K4me2	0	0.999359
emissionprobs	18	14	H3K4me2	1	0.000641405
emissionprobs	18	15	H3K4me3	0	0.99978
emissionprobs	18	15	H3K4me3	1	0.000219673
emissionprobs	18	16	H3K9me2	0	0.92132
emissionprobs	18	16	H3K9me2	1	0.0786797
emissionprobs	18	17	control	0	0.999455
emissionprobs	18	17	control	1	0.000544762
emissionprobs	18	18	mCG	0	0.103205
emissionprobs	18	18	mCG	1	0.896795
emissionprobs	18	19	mCHG	0	0.183185
emissionprobs	18	19	mCHG	1	0.816815
emissionprobs	18	20	mCHH	0	0.225699
emissionprobs	18	20	mCHH	1	0.774301
emissionprobs	19	0	MBD1	0	0.998887
emissionprobs	19	0	MBD1	1	0.00111323
emissionprobs	19	1	MBD2	0	0.996728
emissionprobs	19	1	MBD2	1	0.00327215
emissionprobs	19	2	MBD4	0	0.998948
emissionprobs	19	2	MBD4	1	0.00105192
emissionprobs	19	3	MBD5	0	0.999999
emissionprobs	19	3	MBD5	1	5.24338e-07
emissionprobs	19	4	MBD6	0	1
emissionprobs	19	4	MBD6	1	3.77865e-24
emissionprobs	19	5	SUVH1	0	1
emissionprobs	19	5	SUVH1	1	9.99752e-10
emissionprobs	19	6	SUVH3	0	0.992517
emissionprobs	19	6	SUVH3	1	0.00748311
emissionprobs	19	7	RNA	0	0.996524
emissionprobs	19	7	RNA	1	0.00347628
emissionprobs	19	8	H2AKub	0	0.983758
emissionprobs	19	8	H2AKub	1	0.016242
emissionprobs	19	9	H3	0	0.999995
emissionprobs	19	9	H3	1	5.04106e-06
emissionprobs	19	10	H3K27ac	0	0.993003
emissionprobs	19	10	H3K27ac	1	0.00699731
emissionprobs	19	11	H3K27me3	0	0.998232
emissionprobs	19	11	H3K27me3	1	0.00176822
emissionprobs	19	12	H3K36me3	0	0.99998
emissionprobs	19	12	H3K36me3	1	1.95074e-05
emissionprobs	19	13	H3K4me1	0	0.996586
emissionprobs	19	13	H3K4me1	1	0.00341369
emissionprobs	19	14	H3K4me2	0	0.998752
emissionprobs	19	14	H3K4me2	1	0.00124846
emissionprobs	19	15	H3K4me3	0	1
emissionprobs	19	15	H3K4me3	1	8.89783e-14
emissionprobs	19	16	H3K9me2	0	0.999991
emissionprobs	19	16	H3K9me2	1	9.02871e-06
emissionprobs	19	17	control	0	0.999914
emissionprobs	19	17	control	1	8.63193e-05
emissionprobs	19	18	mCG	0	0.988008
emissionprobs	19	18	mCG	1	0.0119925
emissionprobs	19	19	mCHG	0	0.997857
emissionprobs	19	19	mCHG	1	0.00214257
emissionprobs	19	20	mCHH	0	0.978521
emissionprobs	19	20	mCHH	1	0.0214787
emissionprobs	20	0	MBD1	0	0.869621
emissionprobs	20	0	MBD1	1	0.130379
emissionprobs	20	1	MBD2	0	0.866239
emissionprobs	20	1	MBD2	1	0.133761
emissionprobs	20	2	MBD4	0	0.964965
emissionprobs	20	2	MBD4	1	0.0350355
emissionprobs	20	3	MBD5	0	0.896584
emissionprobs	20	3	MBD5	1	0.103416
emissionprobs	20	4	MBD6	0	0.970587
emissionprobs	20	4	MBD6	1	0.0294127
emissionprobs	20	5	SUVH1	0	0.812645
emissionprobs	20	5	SUVH1	1	0.187355
emissionprobs	20	6	SUVH3	0	0.449802
emissionprobs	20	6	SUVH3	1	0.550198
emissionprobs	20	7	RNA	0	0.976286
emissionprobs	20	7	RNA	1	0.023714
emissionprobs	20	8	H2AKub	0	0.976652
emissionprobs	20	8	H2AKub	1	0.0233478
emissionprobs	20	9	H3	0	1
emissionprobs	20	9	H3	1	3.29812e-118
emissionprobs	20	10	H3K27ac	0	0.941397
emissionprobs	20	10	H3K27ac	1	0.0586035
emissionprobs	20	11	H3K27me3	0	0.99225
emissionprobs	20	11	H3K27me3	1	0.00775017
emissionprobs	20	12	H3K36me3	0	0.999435
emissionprobs	20	12	H3K36me3	1	0.000564986
emissionprobs	20	13	H3K4me1	0	0.998197
emissionprobs	20	13	H3K4me1	1	0.00180345
emissionprobs	20	14	H3K4me2	0	0.98719
emissionprobs	20	14	H3K4me2	1	0.0128095
emissionprobs	20	15	H3K4me3	0	0.982893
emissionprobs	20	15	H3K4me3	1	0.0171073
emissionprobs	20	16	H3K9me2	0	0.999631
emissionprobs	20	16	H3K9me2	1	0.000368978
emissionprobs	20	17	control	0	1
emissionprobs	20	17	control	1	2.73485e-89
emissionprobs	20	18	mCG	0	0.965557
emissionprobs	20	18	mCG	1	0.0344428
emissionprobs	20	19	mCHG	0	0.995815
emissionprobs	20	19	mCHG	1	0.00418485
emissionprobs	20	20	mCHH	0	0.955118
emissionprobs	20	20	mCHH	1	0.0448816

## Sheet: Segments
Supplemental Table S10. Results of the ChromHMM analysis, detailing the emission and enrichment values, the ChromHMM model parameters, and the genome segments.
1	0	200	E16
1	200	400	E17
1	400	1000	E18
1	1000	3600	E19
1	3600	4200	E4
1	4200	4400	E19
1	4400	4600	E2
1	4600	5600	E11
1	5600	7000	E19
1	7000	7400	E11
1	7400	8000	E7
1	8000	8200	E6
1	8200	8400	E4
1	8400	8800	E5
1	8800	10000	E19
1	10000	11600	E1
1	11600	11800	E19
1	11800	12200	E2
1	12200	13000	E3
1	13000	13800	E2
1	13800	14200	E19
1	14200	14400	E1
1	14400	16600	E19
1	16600	17000	E20
1	17000	17600	E12
1	17600	18000	E13
1	18000	18200	E18
1	18200	18600	E17
1	18600	18800	E12
1	18800	19000	E19
1	19000	20000	E1
1	20000	23200	E19
1	23200	24000	E4
1	24000	24200	E6
1	24200	28200	E7
1	28200	28400	E10
1	28400	28600	E11
1	28600	28800	E7
1	28800	30800	E10
1	30800	31000	E9
1	31000	31400	E19
1	31400	32200	E9
1	32200	32400	E8
1	32400	32600	E6
1	32600	33000	E4
1	33000	33200	E5
1	33200	34000	E19
1	34000	36000	E11
1	36000	36800	E6
1	36800	37800	E4
1	37800	38000	E2
1	38000	39000	E19
1	39000	41000	E1
1	41000	42200	E19
1	42200	42400	E20
1	42400	42600	E12
1	42600	43000	E19
1	43000	44600	E1
1	44600	44800	E18
1	44800	45400	E19
1	45400	45600	E9
1	45600	46000	E6
1	46000	46600	E4
1	46600	46800	E5
1	46800	47600	E19
1	47600	48200	E9
1	48200	48400	E8
1	48400	49000	E4
1	49000	49200	E5
1	49200	50200	E19
1	50200	50400	E9
1	50400	50600	E8
1	50600	51000	E4
1	51000	51200	E5
1	51200	52000	E19
1	52000	52200	E2
1	52200	52800	E3
1	52800	53000	E2
1	53000	53400	E19
1	53400	53800	E11
1	53800	54400	E2
1	54400	55400	E19
1	55400	55600	E20
1	55600	56800	E17
1	56800	57400	E20
1	57400	59000	E3
1	59000	62200	E19
1	62200	62400	E2
1	62400	62600	E19
1	62600	62800	E2
1	62800	63600	E19
1	63600	63800	E3
1	63800	65000	E20
1	65000	66000	E9
1	66000	66400	E8
1	66400	67600	E5
1	67600	68400	E19
1	68400	68800	E20
1	68800	70000	E19
1	70000	70400	E2
1	70400	70600	E19
1	70600	71000	E12
1	71000	71200	E19
1	71200	72200	E2
1	72200	72400	E19
1	72400	72600	E5
1	72600	73000	E4
1	73000	73400	E6
1	73400	74200	E9
1	74200	74800	E5
1	74800	75400	E19
1	75400	75600	E20
1	75600	76600	E3
1	76600	76800	E20
1	76800	77600	E17
1	77600	77800	E20
1	77800	78000	E19
1	78000	78200	E2
1	78200	78800	E19
1	78800	79200	E1
1	79200	79800	E19
1	79800	80800	E1
1	80800	83200	E19
1	83200	83800	E2
1	83800	84200	E1
1	84200	84800	E2
1	84800	86600	E19
1	86600	87400	E2
1	87400	87800	E19
1	87800	88200	E2
1	88200	88800	E19
1	88800	89000	E5
1	89000	89600	E4
1	89600	89800	E6
1	89800	90000	E7
1	90000	90400	E11
1	90400	91400	E19
1	91400	92200	E4
1	92200	92400	E6
1	92400	93600	E7
1	93600	95400	E11
1	95400	95800	E19
1	95800	97200	E2
1	97200	97400	E19
1	97400	98000	E5
1	98000	98200	E4
1	98200	98400	E6
1	98400	99000	E8
1	99000	99200	E9
1	99200	100000	E19
1	100000	100200	E5
1	100200	100400	E4
1	100400	100600	E5
1	100600	101000	E4
1	101000	101400	E8
1	101400	101800	E9
1	101800	102800	E19
1	102800	104600	E1
1	104600	105400	E2
1	105400	106200	E1
1	106200	109000	E19
1	109000	109600	E5
1	109600	110200	E4
1	110200	110400	E6
1	110400	110600	E7
1	110600	111200	E10
1	111200	113000	E19
1	113000	113400	E1
1	113400	113800	E2
1	113800	114200	E19
1	114200	114400	E5
1	114400	114800	E4
1	114800	115200	E6
1	115200	115400	E7
1	115400	115600	E11
1	115600	117000	E19
1	117000	118600	E3
1	118600	119200	E19
1	119200	119600	E1
1	119600	120200	E19
1	120200	120600	E2
1	120600	121200	E19
1	121200	121600	E9
1	121600	123800	E10
1	123800	125200	E9
1	125200	125600	E8
1	125600	126000	E9
1	126000	127400	E8
1	127400	127800	E7
1	127800	128000	E6
1	128000	128200	E4
1	128200	128400	E5
1	128400	129600	E19
1	129600	129800	E5
1	129800	130000	E4
1	130000	130600	E5
1	130600	133000	E19
1	133000	135200	E11
1	135200	136000	E2
1	136000	136200	E19
1	136200	136400	E5
1	136400	136600	E4
1	136600	136800	E6
1	136800	137000	E7
1	137000	137200	E11
1	137200	138000	E9
1	138000	138400	E19
1	138400	139600	E2
1	139600	142000	E19
1	142000	142200	E5
1	142200	142800	E4
1	142800	143000	E6
1	143000	143400	E19
1	143400	144600	E2
1	144600	145200	E11
1	145200	147200	E19
1	147200	147600	E2
1	147600	148400	E19
1	148400	148600	E1
1	148600	149400	E2
1	149400	149800	E3
1	149800	151200	E19
1	151200	152200	E2
1	152200	152800	E19
1	152800	154000	E1
1	154000	154600	E19
1	154600	154800	E2
1	154800	156000	E3
1	156000	156400	E19
1	156400	156600	E20
1	156600	156800	E19
1	156800	157000	E20
1	157000	157200	E5
1	157200	158600	E4
1	158600	159400	E19
1	159400	159600	E20
1	159600	160000	E19
1	160000	160200	E9
1	160200	161800	E10
1	161800	162000	E6
1	162000	162200	E4
1	162200	162800	E5
1	162800	163400	E19
1	163400	163600	E5
1	163600	163800	E4
1	163800	164000	E6
1	164000	164400	E11
1	164400	164600	E7
1	164600	166200	E11
1	166200	167000	E19
1	167000	168000	E2
1	168000	168800	E19
1	168800	169000	E2
1	169000	170000	E19
1	170000	170800	E11
1	170800	171400	E19
1	171400	172200	E20
1	172200	173000	E3
1	173000	176000	E19
1	176000	176800	E1
1	176800	177400	E19
1	177400	178000	E2
1	178000	180400	E19
1	180400	182200	E5
1	182200	182600	E20
1	182600	183200	E19
1	183200	183600	E20
1	183600	185200	E19
1	185200	185400	E5
1	185400	186200	E4
1	186200	186400	E6
1	186400	186600	E8
1	186600	187200	E19
1	187200	187400	E5
1	187400	188000	E4
1	188000	188200	E6
1	188200	188600	E7
1	188600	189400	E8
1	189400	189800	E9
1	189800	190400	E19
1	190400	190600	E2
1	190600	191200	E4
1	191200	191600	E6
1	191600	193200	E19
1	193200	193400	E12
1	193400	193600	E17
1	193600	194000	E12
1	194000	195800	E19
1	195800	197000	E4
1	197000	197200	E6
1	197200	197400	E10
1	197400	197600	E8
1	197600	198600	E9
1	198600	199000	E20
1	199000	199400	E19
1	199400	199600	E20
1	199600	199800	E19
1	199800	200800	E5
1	200800	201200	E8
1	201200	201600	E10
1	201600	202000	E20
1	202000	202200	E19
1	202200	202600	E2
1	202600	203000	E19
1	203000	204000	E2
1	204000	205000	E19
1	205000	205800	E3
1	205800	206000	E2
1	206000	209000	E19
1	209000	210000	E1
1	210000	210600	E2
1	210600	211000	E19
1	211000	211200	E1
1	211200	211400	E2
1	211400	213400	E19
1	213400	213800	E12
1	213800	214200	E19
1	214200	214600	E2
1	214600	216800	E19
1	216800	217000	E2
1	217000	219200	E19
1	219200	220000	E2
1	220000	220200	E19
1	220200	220400	E2
1	220400	221000	E3
1	221000	221800	E19
1	221800	223200	E9
1	223200	223400	E19
1	223400	224200	E3
1	224200	224400	E2
1	224400	225800	E19
1	225800	226000	E5
1	226000	227200	E4
1	227200	227400	E5
1	227400	229000	E19
1	229000	229800	E3
1	229800	230000	E2
1	230000	230200	E19
1	230200	230800	E9
1	230800	231200	E19
1	231200	231600	E11
1	231600	232800	E19
1	232800	233200	E20
1	233200	233400	E9
1	233400	235400	E10
1	235400	237000	E7
1	237000	237200	E5
1	237200	237400	E4
1	237400	237800	E5
1	237800	238000	E19
1	238000	238200	E20
1	238200	239400	E17
1	239400	240000	E19
1	240000	240600	E2
1	240600	240800	E19
1	240800	245000	E11
1	245000	246000	E2
1	246000	246200	E19
1	246200	246600	E2
1	246600	247000	E19
1	247000	247600	E11
1	247600	249000	E19
1	249000	249200	E2
1	249200	249800	E4
1	249800	250200	E6
1	250200	250400	E7
1	250400	250600	E11
1	250600	251200	E7
1	251200	252000	E11
1	252000	253000	E19
1	253000	254000	E11
1	254000	254400	E2
1	254400	254800	E19
1	254800	255400	E2
1	255400	255800	E19
1	255800	256000	E18
1	256000	256800	E12
1	256800	257000	E19
1	257000	257600	E2
1	257600	258200	E18
1	258200	258600	E17
1	258600	258800	E18
1	258800	259200	E3
1	259200	259600	E19
1	259600	260000	E2
1	260000	261600	E11
1	261600	262800	E19
1	262800	263200	E5
1	263200	263400	E4
1	263400	263800	E6
1	263800	264400	E7
1	264400	265200	E8
1	265200	265800	E10
1	265800	266000	E9
1	266000	266400	E19
1	266400	266600	E5
1	266600	266800	E4
1	266800	267000	E6
1	267000	267400	E11
1	267400	268400	E19
1	268400	270400	E3
1	270400	270800	E20
1	270800	271000	E19
1	271000	271400	E4
1	271400	271600	E6
1	271600	272000	E9
1	272000	273000	E11
1	273000	273800	E7
1	273800	274200	E6
1	274200	274600	E4
1	274600	274800	E2
1	274800	275600	E19
1	275600	276200	E9
1	276200	277600	E11
1	277600	278000	E6
1	278000	278400	E4
1	278400	278600	E5
1	278600	279400	E4
1	279400	279600	E6
1	279600	281600	E7
1	281600	281800	E11
1	281800	282000	E10
1	282000	282200	E11
1	282200	283000	E19
1	283000	283600	E9
1	283600	283800	E19
1	283800	284000	E9
1	284000	284400	E19
1	284400	284600	E5
1	284600	285200	E4
1	285200	285800	E6
1	285800	289000	E8
1	289000	290400	E9
1	290400	290800	E10
1	290800	291000	E9
1	291000	291600	E19
1	291600	291800	E20
1	291800	292600	E17
1	292600	293400	E19
1	293400	293600	E5
1	293600	294200	E4
1	294200	294400	E6
1	294400	294600	E8
1	294600	295000	E9
1	295000	295200	E19
1	295200	295600	E3
1	295600	296200	E19
1	296200	296600	E9
1	296600	297400	E8
1	297400	297800	E4
1	297800	298200	E5
1	298200	298600	E19
1	298600	298800	E5
1	298800	299800	E4
1	299800	300600	E2
1	300600	301200	E19
1	301200	301800	E2
1	301800	302000	E19
1	302000	302400	E2
1	302400	303600	E19
1	303600	304000	E3
1	304000	304200	E19
1	304200	304600	E9
1	304600	305000	E11
1	305000	305600	E7
1	305600	305800	E6
1	305800	306200	E4
1	306200	306400	E5
1	306400	306600	E19
1	306600	306800	E2
1	306800	307600	E11
1	307600	308200	E7
1	308200	308600	E6
1	308600	309000	E4
1	309000	309200	E2
1	309200	310400	E19
1	310400	310600	E1
1	310600	311000	E2
1	311000	311400	E19
1	311400	312000	E2
1	312000	312400	E3
1	312400	312800	E2
1	312800	313400	E19
1	313400	314400	E9
1	314400	315000	E8
1	315000	315200	E6
1	315200	315400	E4
1	315400	316000	E5
1	316000	316200	E19
1	316200	316600	E4
1	316600	317000	E6
1	317000	317600	E7
1	317600	319000	E11
1	319000	320200	E19
1	320200	320600	E11
1	320600	321600	E7
1	321600	322200	E6
1	322200	322600	E4
1	322600	322800	E5
1	322800	323000	E19
1	323000	323200	E5
1	323200	323600	E4
1	323600	323800	E6
1	323800	324200	E7
1	324200	324600	E11
1	324600	324800	E9
1	324800	325400	E19
1	325400	325800	E5
1	325800	326000	E4
1	326000	326200	E6
1	326200	327800	E7
1	327800	328800	E11
1	328800	329000	E7
1	329000	329200	E11
1	329200	330200	E10
1	330200	330800	E20
1	330800	331200	E9
1	331200	332200	E10
1	332200	333200	E9
1	333200	333400	E8
1	333400	336200	E7
1	336200	336600	E6
1	336600	337600	E4
1	337600	337800	E5
1	337800	338200	E19
1	338200	338400	E5
1	338400	338800	E4
1	338800	339200	E8
1	339200	339400	E9
1	339400	339800	E10
1	339800	340000	E9
1	340000	340600	E19
1	340600	342000	E2
1	342000	343200	E19
1	343200	343600	E6
1	343600	344000	E4
1	344000	344400	E5
1	344400	345800	E19
1	345800	346200	E5
1	346200	347000	E4
1	347000	347200	E2
1	347200	347800	E19
1	347800	348000	E5
1	348000	348400	E4
1	348400	348600	E6
1	348600	350400	E7
1	350400	350600	E10
1	350600	352000	E11
1	352000	352800	E19
1	352800	353200	E9
1	353200	353400	E11
1	353400	353600	E6
1	353600	354400	E4
1	354400	354800	E5
1	354800	355200	E19
1	355200	356200	E2
1	356200	358000	E19
1	358000	358800	E2
1	358800	359000	E1
1	359000	359400	E19
1	359400	361600	E11
1	361600	361800	E7
1	361800	362400	E6
1	362400	363000	E4
1	363000	363200	E5
1	363200	365000	E19
1	365000	365600	E1
1	365600	366800	E2
1	366800	367000	E19
1	367000	367600	E1
1	367600	370000	E19
1	370000	372400	E1
1	372400	372600	E12
1	372600	373600	E19
1	373600	374000	E5
1	374000	374200	E4
1	374200	374600	E6
1	374600	383800	E7
1	383800	384000	E11
1	384000	384800	E7
1	384800	386800	E9
1	386800	387400	E19
1	387400	387600	E9
1	387600	388000	E11
1	388000	388200	E7
1	388200	388800	E8
1	388800	389000	E6
1	389000	389600	E4
1	389600	389800	E19
1	389800	390200	E5
1	390200	390400	E4
1	390400	390600	E6
1	390600	391800	E7
1	391800	392200	E11
1	392200	392800	E9
1	392800	393800	E3
1	393800	394000	E2
1	394000	394200	E11
1	394200	395400	E10
1	395400	395600	E19
1	395600	396000	E5
1	396000	396400	E4
1	396400	396800	E6
1	396800	397200	E8
1	397200	398000	E7
1	398000	398800	E8
1	398800	399800	E9
1	399800	400200	E19
1	400200	400600	E9
1	400600	401200	E8
1	401200	401400	E4
1	401400	401800	E5
1	401800	403200	E19
1	403200	403600	E9
1	403600	403800	E8
1	403800	404200	E4
1	404200	404400	E5
1	404400	404600	E19
1	404600	404800	E5
1	404800	405200	E4
1	405200	405400	E6
1	405400	407600	E7
1	407600	408200	E11
1	408200	408400	E9
1	408400	408800	E19
1	408800	409000	E5
1	409000	409600	E4
1	409600	410000	E6
1	410000	410600	E9
1	410600	410800	E19
1	410800	411000	E5
1	411000	411200	E4
1	411200	411400	E6
1	411400	411600	E9
1	411600	411800	E19
1	411800	412000	E5
1	412000	412600	E4
1	412600	412800	E6
1	412800	413200	E8
1	413200	413400	E9
1	413400	414200	E19
1	414200	414600	E3
1	414600	415000	E19
1	415000	415200	E1
1	415200	415600	E2
1	415600	420600	E1
1	420600	421600	E2
1	421600	422400	E9
1	422400	422800	E19
1	422800	424400	E12
1	424400	424800	E19
1	424800	425400	E2
1	425400	428000	E19
1	428000	428200	E12
1	428200	429600	E19
1	429600	430800	E2
1	430800	431000	E19
1	431000	431200	E20
1	431200	431600	E16
1	431600	432200	E17
1	432200	433000	E18
1	433000	433800	E17
1	433800	434000	E18
1	434000	434400	E20
1	434400	435600	E19
1	435600	437000	E2
1	437000	438400	E19
1	438400	438600	E2
1	438600	438800	E11
1	438800	439000	E19
1	439000	439600	E2
1	439600	441200	E19
1	441200	441400	E11
1	441400	442000	E10
1	442000	442400	E6
1	442400	442800	E4
1	442800	443200	E19
1	443200	443600	E9
1	443600	444000	E19
1	444000	444200	E9
1	444200	444600	E11
1	444600	445200	E7
1	445200	445400	E6
1	445400	445800	E4
1	445800	446200	E5
1	446200	448600	E19
1	448600	449000	E9
1	449000	449200	E10
1	449200	449600	E8
1	449600	449800	E6
1	449800	450200	E4
1	450200	450400	E5
1	450400	450800	E19
1	450800	451600	E11
1	451600	452000	E7
1	452000	452200	E6
1	452200	452600	E4
1	452600	452800	E5
1	452800	453200	E19
1	453200	453600	E5
1	453600	454000	E4
1	454000	454200	E6
1	454200	454800	E8
1	454800	455400	E9
1	455400	455600	E19
1	455600	456200	E5
1	456200	456400	E4
1	456400	457200	E8
1	457200	457400	E10
1	457400	458000	E9
1	458000	460200	E19
1	460200	460800	E1
1	460800	462200	E19
1	462200	462400	E9
1	462400	462800	E8
1	462800	463200	E4
1	463200	463600	E5
1	463600	464000	E19
1	464000	464400	E3
1	464400	464600	E2
1	464600	466600	E1
1	466600	467200	E2
1	467200	467800	E3
1	467800	468800	E19
1	468800	469800	E20
1	469800	470600	E4
1	470600	471400	E3
1	471400	472000	E19
1	472000	472600	E9
1	472600	473000	E3
1	473000	473200	E2
1	473200	474400	E19
1	474400	475200	E4
1	475200	475400	E6
1	475400	475600	E11
1	475600	475800	E19
1	475800	476400	E2
1	476400	477000	E19
1	477000	477200	E5
1	477200	477400	E4
1	477400	478000	E2
1	478000	478200	E11
1	478200	478400	E19
1	478400	478800	E2
1	478800	479400	E19
1	479400	480800	E1
1	480800	481400	E2
1	481400	482400	E1
1	482400	483200	E2
1	483200	485600	E19
1	485600	487000	E20
1	487000	487400	E3
1	487400	490000	E20
1	490000	490600	E2
1	490600	491000	E19
1	491000	491600	E5
1	491600	492000	E8
1	492000	492400	E9
1	492400	492600	E19
1	492600	492800	E9
1	492800	493600	E19
1	493600	494200	E4
1	494200	494400	E6
1	494400	494800	E7
1	494800	495800	E11
1	495800	497400	E19
1	497400	497600	E2
1	497600	498000	E19
1	498000	498400	E2
1	498400	499200	E19
1	499200	499600	E12
1	499600	500000	E13
1	500000	500800	E18
1	500800	501000	E13
1	501000	501400	E12
1	501400	502400	E19
1	502400	503600	E1
1	503600	504800	E19
1	504800	505200	E1
1	505200	506400	E19
1	506400	506600	E1
1	506600	507000	E2
1	507000	509800	E19
1	509800	510000	E1
1	510000	512600	E19
1	512600	513200	E17
1	513200	514000	E19
1	514000	514200	E9
1	514200	514400	E6
1	514400	514800	E4
1	514800	515000	E5
1	515000	515200	E4
1	515200	515400	E5
1	515400	516000	E19
1	516000	517000	E2
1	517000	518200	E19
1	518200	519000	E5
1	519000	519400	E8
1	519400	519600	E9
1	519600	520000	E10
1	520000	520400	E9
1	520400	520600	E19
1	520600	521800	E2
1	521800	523600	E19
1	523600	524600	E2
1	524600	524800	E19
1	524800	525600	E11
1	525600	526400	E10
1	526400	528400	E12
1	528400	529600	E19
1	529600	530800	E2
1	530800	531000	E19
1	531000	532600	E12
1	532600	533000	E19
1	533000	533600	E12
1	533600	536600	E19
1	536600	537200	E2
1	537200	537800	E19
1	537800	538200	E5
1	538200	538800	E4
1	538800	539600	E8
1	539600	540000	E9
1	540000	540200	E19
1	540200	540400	E20
1	540400	540600	E17
1	540600	541000	E18
1	541000	541200	E20
1	541200	541400	E19
1	541400	542000	E2
1	542000	543000	E19
1	543000	543800	E2
1	543800	545600	E19
1	545600	549400	E1
1	549400	549600	E19
1	549600	549800	E17
1	549800	550600	E12
1	550600	550800	E17
1	550800	551000	E12
1	551000	551200	E1
1	551200	551600	E2
1	551600	552000	E19
1	552000	552400	E2
1	552400	555000	E19
1	555000	556000	E5
1	556000	556200	E20
1	556200	557200	E19
1	557200	557400	E2
1	557400	558000	E3
1	558000	558800	E2
1	558800	559600	E19
1	559600	560200	E20
1	560200	561000	E19
1	561000	561400	E2
1	561400	564200	E19
1	564200	564600	E3
1	564600	565400	E19
1	565400	565800	E2
1	565800	566200	E19
1	566200	567600	E2
1	567600	568600	E19
1	568600	570200	E3
1	570200	570400	E2
1	570400	571400	E19
1	571400	572400	E20
1	572400	572800	E16
1	572800	573400	E10
1	573400	573800	E3
1	573800	574200	E4
1	574200	575000	E5
1	575000	575800	E19
1	575800	576200	E2
1	576200	576400	E19
1	576400	577000	E2
1	577000	577200	E6
1	577200	579400	E11
1	579400	579600	E19
1	579600	580400	E2
1	580400	580600	E19
1	580600	581000	E5
1	581000	581200	E4
1	581200	581400	E6
1	581400	581800	E8
1	581800	582000	E9
1	582000	582400	E19
1	582400	583800	E1
1	583800	584200	E19
1	584200	584800	E4
1	584800	585000	E6
1	585000	587000	E11
1	587000	587400	E19
1	587400	588000	E13
1	588000	588200	E12
1	588200	589200	E2
1	589200	589600	E19
1	589600	590200	E2
1	590200	591800	E19
1	591800	593000	E3
1	593000	593200	E2
1	593200	594800	E19
1	594800	596200	E9
1	596200	597600	E11
1	597600	598800	E2
1	598800	600000	E19
1	600000	600400	E11
1	600400	601200	E7
1	601200	601600	E6
1	601600	602000	E4
1	602000	602200	E5
1	602200	602600	E19
1	602600	602800	E5
1	602800	603000	E4
1	603000	603200	E6
1	603200	603800	E7
1	603800	604000	E11
1	604000	604200	E9
1	604200	605200	E19
1	605200	606200	E1
1	606200	606600	E2
1	606600	608000	E19
1	608000	608400	E9
1	608400	608800	E8
1	608800	609400	E5
1	609400	610800	E19
1	610800	612400	E1
1	612400	612600	E19
1	612600	612800	E12
1	612800	613400	E19
1	613400	613800	E2
1	613800	615000	E19
1	615000	616200	E2
1	616200	618200	E19
1	618200	618400	E1
1	618400	619400	E2
1	619400	619600	E19
1	619600	620200	E1
1	620200	620600	E19
1	620600	621200	E2
1	621200	621600	E19
1	621600	621800	E5
1	621800	622400	E4
1	622400	622600	E2
1	622600	623800	E19
1	623800	624600	E2
1	624600	625200	E19
1	625200	625800	E2
1	625800	626800	E19
1	626800	627000	E5
1	627000	627400	E4
1	627400	627600	E6
1	627600	628200	E8
1	628200	628400	E10
1	628400	628800	E8
1	628800	629800	E9
1	629800	630600	E19
1	630600	630800	E3
1	630800	631200	E2
1	631200	631400	E6
1	631400	631600	E8
1	631600	633200	E9
1	633200	633400	E19
1	633400	634000	E20
1	634000	634600	E18
1	634600	635200	E20
1	635200	635400	E3
1	635400	636400	E4
1	636400	636600	E6
1	636600	637000	E9
1	637000	637400	E19
1	637400	637600	E9
1	637600	637800	E19
1	637800	638000	E6
1	638000	638600	E4
1	638600	639200	E19
1	639200	641200	E12
1	641200	641600	E19
1	641600	641800	E4
1	641800	642000	E5
1	642000	643000	E19
1	643000	643400	E9
1	643400	643800	E8
1	643800	644400	E4
1	644400	644600	E5
1	644600	645400	E19
1	645400	647200	E9
1	647200	648200	E8
1	648200	650800	E7
1	650800	651000	E6
1	651000	651400	E4
1	651400	652000	E5
1	652000	653800	E19
1	653800	654400	E3
1	654400	655600	E19
1	655600	655800	E9
1	655800	656400	E10
1	656400	657400	E8
1	657400	657600	E4
1	657600	658200	E5
1	658200	658800	E19
1	658800	659800	E2
1	659800	660800	E19
1	660800	661000	E2
1	661000	661200	E20
1	661200	662200	E3
1	662200	663600	E19
1	663600	663800	E2
1	663800	665200	E19
1	665200	665800	E1
1	665800	667200	E19
1	667200	668000	E9
1	668000	668200	E11
1	668200	669200	E7
1	669200	669600	E4
1	669600	669800	E5
1	669800	670200	E19
1	670200	670600	E12
1	670600	671000	E17
1	671000	671400	E19
1	671400	672800	E2
1	672800	673400	E19
1	673400	673800	E4
1	673800	674200	E2
1	674200	674400	E19
1	674400	675800	E11
1	675800	677400	E19
1	677400	677800	E2
1	677800	678000	E19
1	678000	678200	E2
1	678200	678400	E19
1	678400	678600	E11
1	678600	679200	E19
1	679200	679800	E11
1	679800	681600	E19
1	681600	681800	E9
1	681800	683200	E11
1	683200	683400	E7
1	683400	683800	E11
1	683800	686400	E7
1	686400	686800	E6
1	686800	687200	E4
1	687200	687400	E5
1	687400	688200	E19
1	688200	688600	E11
1	688600	689000	E10
1	689000	689600	E11
1	689600	691200	E7
1	691200	691400	E6
1	691400	691600	E7
1	691600	691800	E6
1	691800	692400	E4
1	692400	692600	E5
1	692600	693800	E19
1	693800	694600	E2
1	694600	695400	E11
1	695400	695600	E19
1	695600	696200	E2
1	696200	696400	E19
1	696400	696800	E17
1	696800	697600	E12
1	697600	700800	E1
1	700800	701400	E19
1	701400	701600	E5
1	701600	702200	E4
1	702200	702400	E6
1	702400	702600	E7
1	702600	703400	E11
1	703400	703600	E9
1	703600	704000	E19
1	704000	704600	E9
1	704600	704800	E11
1	704800	705400	E7
1	705400	705600	E6
1	705600	706400	E4
1	706400	706600	E5
1	706600	707600	E19
1	707600	708200	E2
1	708200	708800	E19
1	708800	709600	E2
1	709600	710800	E19
1	710800	711000	E11
1	711000	711800	E2
1	711800	712800	E19
1	712800	713000	E9
1	713000	713800	E10
1	713800	715800	E11
1	715800	726200	E7
1	726200	726400	E6
1	726400	726800	E4
1	726800	727400	E5
1	727400	727800	E20
1	727800	729400	E19
1	729400	729600	E1
1	729600	729800	E19
1	729800	730600	E2
1	730600	731800	E19
1	731800	732600	E9
1	732600	733000	E11
1	733000	734000	E9
1	734000	736200	E11
1	736200	737200	E7
1	737200	737400	E6
1	737400	737600	E4
1	737600	738000	E5
1	738000	739600	E19
1	739600	739800	E5
1	739800	741000	E4
1	741000	741200	E6
1	741200	741400	E7
1	741400	741800	E11
1	741800	744000	E9
1	744000	744600	E19
1	744600	745200	E10
1	745200	745600	E11
1	745600	745800	E10
1	745800	746000	E6
1	746000	746400	E4
1	746400	746600	E5
1	746600	747200	E19
1	747200	747400	E2
1	747400	748200	E19
1	748200	749000	E2
1	749000	749200	E19
1	749200	749400	E5
1	749400	749800	E4
1	749800	750000	E6
1	750000	750800	E7
1	750800	751600	E11
1	751600	752200	E19
1	752200	752400	E2
1	752400	754200	E3
1	754200	754400	E20
1	754400	754800	E5
1	754800	755000	E8
1	755000	755200	E6
1	755200	756000	E4
1	756000	756600	E5
1	756600	756800	E4
1	756800	757000	E6
1	757000	757400	E7
1	757400	757800	E6
1	757800	758200	E19
1	758200	758600	E20
1	758600	758800	E17
1	758800	759000	E12
1	759000	759200	E18
1	759200	759400	E12
1	759400	759600	E18
1	759600	759800	E12
1	759800	760400	E17
1	760400	760600	E12
1	760600	761200	E19
1	761200	761400	E5
1	761400	762200	E4
1	762200	762600	E6
1	762600	764200	E7
1	764200	765800	E8
1	765800	766400	E9
1	766400	769800	E19
1	769800	770400	E2
1	770400	772000	E19
1	772000	773000	E1
1	773000	773400	E19
1	773400	774000	E4
1	774000	774200	E6
1	774200	774600	E7
1	774600	775200	E11
1	775200	775400	E19
1	775400	775600	E5
1	775600	776200	E4
1	776200	776400	E6
1	776400	778000	E7
1	778000	779400	E11
1	779400	780200	E19
1	780200	780600	E20
1	780600	781000	E3
1	781000	782000	E17
1	782000	782200	E18
1	782200	782400	E12
1	782400	782800	E19
1	782800	783000	E5
1	783000	783400	E4
1	783400	783800	E6
1	783800	784200	E9
1	784200	784800	E19
1	784800	785600	E12
1	785600	787000	E19
1	787000	787200	E2
1	787200	788200	E3
1	788200	788600	E9
1	788600	790000	E19
1	790000	790200	E3
1	790200	791000	E4
1	791000	791200	E3
1	791200	791600	E20
1	791600	792600	E17
1	792600	793200	E20
1	793200	793400	E19
1	793400	794000	E9
1	794000	794600	E8
1	794600	795000	E4
1	795000	795400	E5
1	795400	796000	E19
1	796000	796400	E11
1	796400	797600	E7
1	797600	797800	E6
1	797800	798400	E4
1	798400	798600	E5
1	798600	799000	E19
1	799000	799200	E5
1	799200	799600	E4
1	799600	800000	E6
1	800000	800600	E7
1	800600	802200	E11
1	802200	803000	E19
1	803000	803600	E5
1	803600	805200	E7
1	805200	805600	E11
1	805600	806800	E9
1	806800	807400	E19
1	807400	807800	E5
1	807800	808200	E4
1	808200	808400	E6
1	808400	809000	E8
1	809000	809200	E9
1	809200	809600	E11
1	809600	810800	E9
1	810800	811200	E19
1	811200	812200	E11
1	812200	812600	E6
1	812600	813200	E4
1	813200	813400	E19
1	813400	813600	E5
1	813600	814000	E4
1	814000	815000	E8
1	815000	816600	E9
1	816600	818000	E19
1	818000	818400	E9
1	818400	818600	E8
1	818600	818800	E6
1	818800	819200	E4
1	819200	819400	E5
1	819400	819600	E19
1	819600	820600	E2
1	820600	821200	E1
1	821200	822000	E19
1	822000	822600	E12
1	822600	822800	E19
1	822800	823000	E9
1	823000	823200	E8
1	823200	823400	E6
1	823400	823800	E4
1	823800	824400	E5
1	824400	824600	E19
1	824600	825200	E4
1	825200	825400	E6
1	825400	826000	E7
1	826000	826200	E11
1	826200	826400	E2
1	826400	826600	E19
1	826600	826800	E5
1	826800	827000	E4
1	827000	827200	E6
1	827200	829000	E7
1	829000	829800	E11
1	829800	830200	E9
1	830200	830600	E19
1	830600	830800	E5
1	830800	831000	E4
1	831000	831200	E5
1	831200	831600	E4
1	831600	831800	E6
1	831800	833000	E7
1	833000	834400	E11
1	834400	834800	E10
1	834800	835200	E9
1	835200	835800	E19
1	835800	836200	E5
1	836200	836400	E4
1	836400	836600	E6
1	836600	838600	E7
1	838600	839200	E8
1	839200	839400	E6
1	839400	839800	E11
1	839800	840800	E9
1	840800	841200	E19
1	841200	841600	E12
1	841600	842800	E19
1	842800	843000	E9
1	843000	843200	E8
1	843200	844200	E4
1	844200	846000	E19
1	846000	846800	E2
1	846800	847400	E4
1	847400	847600	E5
1	847600	847800	E19
1	847800	848200	E5
1	848200	848600	E4
1	848600	848800	E6
1	848800	849200	E9
1	849200	852400	E19
1	852400	852800	E3
1	852800	853600	E4
1	853600	853800	E5
1	853800	856000	E19
1	856000	856200	E1
1	856200	857200	E19
1	857200	859200	E1
1	859200	859800	E2
1	859800	861200	E19
1	861200	861400	E11
1	861400	862000	E10
1	862000	862800	E11
1	862800	863000	E7
1	863000	863200	E6
1	863200	864200	E2
1	864200	865000	E19
1	865000	865400	E20
1	865400	866200	E19
1	866200	866600	E11
1	866600	867200	E6
1	867200	867600	E4
1	867600	867800	E5
1	867800	869000	E19
1	869000	869400	E9
1	869400	870000	E8
1	870000	870200	E6
1	870200	870800	E4
1	870800	871200	E5
1	871200	871800	E19
1	871800	872200	E2
1	872200	872800	E1
1	872800	873600	E19
1	873600	874600	E11
1	874600	875000	E19
1	875000	875200	E6
1	875200	875800	E4
1	875800	876200	E19
1	876200	876600	E11
1	876600	876800	E7
1	876800	877200	E6
1	877200	877600	E4
1	877600	878000	E19
1	878000	878400	E9
1	878400	878800	E11
1	878800	879200	E7
1	879200	879400	E6
1	879400	879600	E4
1	879600	880200	E5
1	880200	880600	E19
1	880600	881000	E11
1	881000	881800	E10
1	881800	882400	E11
1	882400	882600	E7
1	882600	882800	E6
1	882800	883400	E4
1	883400	883800	E19
1	883800	884200	E4
1	884200	884400	E3
1	884400	884600	E2
1	884600	884800	E11
1	884800	885400	E10
1	885400	888000	E11
1	888000	888400	E19
1	888400	888600	E20
1	888600	889600	E17
1	889600	889800	E20
1	889800	890000	E3
1	890000	890200	E20
1	890200	890600	E19
1	890600	891400	E10
1	891400	891600	E7
1	891600	891800	E6
1	891800	892400	E4
1	892400	893000	E19
1	893000	893600	E2
1	893600	893800	E11
1	893800	894400	E19
1	894400	895200	E9
1	895200	895600	E11
1	895600	896000	E7
1	896000	896400	E6
1	896400	896800	E19
1	896800	897400	E4
1	897400	898800	E19
1	898800	899000	E5
1	899000	899600	E4
1	899600	899800	E5
1	899800	901000	E19
1	901000	901600	E5
1	901600	902000	E4
1	902000	902400	E5
1	902400	902800	E9
1	902800	904400	E19
1	904400	904600	E2
1	904600	905400	E19
1	905400	905800	E11
1	905800	906200	E19
1	906200	906400	E2
1	906400	907600	E19
1	907600	908800	E4
1	908800	909000	E6
1	909000	909400	E9
1	909400	910200	E19
1	910200	910800	E2
1	910800	911200	E3
1	911200	911600	E2
1	911600	913400	E19
1	913400	913800	E2
1	913800	914200	E19
1	914200	914800	E2
1	914800	915600	E19
1	915600	916000	E11
1	916000	916800	E19
1	916800	917200	E9
1	917200	917400	E5
1	917400	917600	E4
1	917600	918000	E5
1	918000	918200	E19
1	918200	918600	E5
1	918600	918800	E4
1	918800	919000	E6
1	919000	919600	E7
1	919600	920200	E11
1	920200	920400	E9
1	920400	921000	E19
1	921000	921200	E2
1	921200	922400	E19
1	922400	923400	E1
1	923400	924000	E2
1	924000	929800	E1
1	929800	931000	E19
1	931000	931200	E5
1	931200	931400	E4
1	931400	931600	E5
1	931600	932000	E20
1	932000	933600	E19
1	933600	934000	E5
1	934000	934400	E4
1	934400	935000	E8
1	935000	935200	E9
1	935200	935800	E10
1	935800	937000	E9
1	937000	937200	E20
1	937200	937600	E5
1	937600	937800	E19
1	937800	938000	E5
1	938000	938600	E4
1	938600	938800	E6
1	938800	939400	E7
1	939400	940600	E11
1	940600	941600	E19
1	941600	942400	E11
1	942400	942600	E7
1	942600	942800	E6
1	942800	943200	E4
1	943200	943400	E5
1	943400	944000	E19
1	944000	944200	E12
1	944200	944400	E18
1	944400	944600	E19
1	944600	945000	E4
1	945000	945400	E2
1	945400	947200	E11
1	947200	947800	E19
1	947800	949000	E11
1	949000	949400	E19
1	949400	949600	E2
1	949600	949800	E19
1	949800	950000	E11
1	950000	950400	E2
1	950400	951200	E11
1	951200	951400	E19
1	951400	951800	E2
1	951800	952200	E19
1	952200	954600	E1
1	954600	955800	E2
1	955800	956800	E1
1	956800	957200	E19
1	957200	958000	E3
1	958000	958400	E19
1	958400	958600	E12
1	958600	959000	E17
1	959000	959200	E12
1	959200	959400	E19
1	959400	960200	E1
1	960200	960600	E2
1	960600	962200	E19
1	962200	962400	E2
1	962400	963000	E10
1	963000	965400	E11
1	965400	966000	E7
1	966000	966200	E6
1	966200	966800	E4
1	966800	967000	E19
1	967000	967400	E1
1	967400	967600	E19
1	967600	968400	E2
1	968400	970600	E1
1	970600	971200	E19
1	971200	973000	E1
1	973000	973800	E19
1	973800	974400	E1
1	974400	974800	E12
1	974800	976000	E19
1	976000	976200	E2
1	976200	976600	E3
1	976600	977200	E19
1	977200	977600	E3
1	977600	977800	E2
1	977800	979400	E19
1	979400	979800	E9
1	979800	980200	E10
1	980200	981200	E8
1	981200	981800	E4
1	981800	982000	E5
1	982000	982600	E19
1	982600	983400	E3
1	983400	984200	E20
1	984200	985800	E19
1	985800	988000	E1
1	988000	988600	E19
1	988600	990800	E1
1	990800	991200	E19
1	991200	991400	E5
1	991400	992000	E4
1	992000	992200	E6
1	992200	992600	E8
1	992600	993000	E9
1	993000	993400	E19
1	993400	993800	E4
1	993800	994200	E6
1	994200	995600	E11
1	995600	996000	E19
1	996000	996400	E5
1	996400	996600	E4
1	996600	996800	E6
1	996800	998600	E7
1	998600	999600	E10
1	999600	1000400	E9
1	1000400	1001200	E19
1	1001200	1002000	E2
1	1002000	1005000	E19
1	1005000	1005200	E5
1	1005200	1005600	E4
1	1005600	1005800	E6
1	1005800	1006400	E7
1	1006400	1006800	E11
1	1006800	1007000	E9
1	1007000	1008200	E10
1	1008200	1008600	E19
1	1008600	1009200	E4
1	1009200	1009600	E19
1	1009600	1010800	E11
1	1010800	1011400	E19
1	1011400	1011800	E9
1	1011800	1012600	E8
1	1012600	1012800	E6
1	1012800	1013200	E4
1	1013200	1013400	E5
1	1013400	1013800	E19
1	1013800	1014400	E4
1	1014400	1014800	E6
1	1014800	1015800	E7
1	1015800	1016000	E11
1	1016000	1016600	E7
1	1016600	1017400	E11
1	1017400	1017600	E9
1	1017600	1018200	E19
1	1018200	1018600	E5
1	1018600	1019000	E4
1	1019000	1019200	E6
1	1019200	1020400	E19
1	1020400	1020600	E11
1	1020600	1021000	E19
1	1021000	1021200	E11
1	1021200	1022200	E2
1	1022200	1022400	E19
1	1022400	1023600	E1
1	1023600	1025200	E19
1	1025200	1026800	E11
1	1026800	1027400	E2
1	1027400	1028000	E3
1	1028000	1028400	E5
1	1028400	1028600	E20
1	1028600	1029000	E3
1	1029000	1029200	E20
1	1029200	1031800	E19
1	1031800	1033800	E11
1	1033800	1034000	E7
1	1034000	1034600	E11
1	1034600	1035200	E7
1	1035200	1035600	E6
1	1035600	1036200	E4
1	1036200	1036400	E19
1	1036400	1037800	E2
1	1037800	1038000	E19
1	1038000	1038200	E2
1	1038200	1039000	E11
1	1039000	1040400	E19
1	1040400	1041000	E3
1	1041000	1041400	E2
1	1041400	1041600	E19
1	1041600	1042400	E11
1	1042400	1043400	E9
1	1043400	1043800	E3
1	1043800	1046000	E19
1	1046000	1048600	E11
1	1048600	1049800	E2
1	1049800	1050400	E19
1	1050400	1050600	E2
1	1050600	1051000	E4
1	1051000	1051200	E5
1	1051200	1051400	E19
1	1051400	1051600	E5
1	1051600	1051800	E4
1	1051800	1052000	E6
1	1052000	1053400	E7
1	1053400	1054600	E8
1	1054600	1055800	E9
1	1055800	1056000	E10
1	1056000	1056400	E9
1	1056400	1056600	E10
1	1056600	1057000	E19
1	1057000	1057800	E2
1	1057800	1058600	E11
1	1058600	1058800	E19
1	1058800	1059600	E2
1	1059600	1060200	E4
1	1060200	1060600	E6
1	1060600	1061600	E19
1	1061600	1062400	E11
1	1062400	1062600	E19
1	1062600	1064000	E2
1	1064000	1064600	E19
1	1064600	1065600	E9
1	1065600	1066200	E10
1	1066200	1067000	E11
1	1067000	1069600	E7
1	1069600	1070000	E6
1	1070000	1070600	E4
1	1070600	1071000	E2
1	1071000	1071800	E19
1	1071800	1072800	E1
1	1072800	1073400	E19
1	1073400	1074000	E4
1	1074000	1074400	E6
1	1074400	1075000	E11
1	1075000	1075600	E19
1	1075600	1075800	E20
1	1075800	1076200	E10
1	1076200	1077000	E9
1	1077000	1078600	E8
1	1078600	1079800	E7
1	1079800	1080000	E6
1	1080000	1080200	E4
1	1080200	1080600	E5
1	1080600	1081200	E19
1	1081200	1084400	E2
1	1084400	1086200	E19
1	1086200	1086600	E4
1	1086600	1087200	E6
1	1087200	1088400	E7
1	1088400	1088600	E11
1	1088600	1089200	E7
1	1089200	1089400	E11
1	1089400	1090800	E7
1	1090800	1091200	E11
1	1091200	1091600	E7
1	1091600	1091800	E11
1	1091800	1092200	E7
1	1092200	1093000	E11
1	1093000	1093200	E7
1	1093200	1093800	E11
1	1093800	1094000	E7
1	1094000	1095400	E11
1	1095400	1095600	E19
1	1095600	1095800	E2
1	1095800	1096200	E3
1	1096200	1097000	E19
1	1097000	1097200	E5
1	1097200	1097600	E4
1	1097600	1097800	E6
1	1097800	1098800	E8
1	1098800	1099800	E9
1	1099800	1102400	E19
1	1102400	1103000	E1
1	1103000	1104400	E19
1	1104400	1106000	E2
1	1106000	1106600	E19
1	1106600	1107400	E9
1	1107400	1108000	E8
1	1108000	1108600	E4
1	1108600	1109400	E19
1	1109400	1109600	E5
1	1109600	1110000	E4
1	1110000	1110400	E6
1	1110400	1112200	E7
1	1112200	1113800	E11
1	1113800	1114400	E19
1	1114400	1114800	E5
1	1114800	1115200	E4
1	1115200	1115400	E6
1	1115400	1117600	E7
1	1117600	1118400	E11
1	1118400	1119000	E10
1	1119000	1119400	E9
1	1119400	1119800	E19
1	1119800	1120600	E1
1	1120600	1121600	E19
1	1121600	1121800	E1
1	1121800	1122200	E2
1	1122200	1123000	E19
1	1123000	1124200	E1
1	1124200	1125400	E19
1	1125400	1125800	E5
1	1125800	1126000	E4
1	1126000	1126200	E6
1	1126200	1127000	E7
1	1127000	1127400	E11
1	1127400	1128400	E19
1	1128400	1129400	E3
1	1129400	1132600	E19
1	1132600	1132800	E1
1	1132800	1136000	E19
1	1136000	1136200	E1
1	1136200	1137200	E2
1	1137200	1138400	E1
1	1138400	1140600	E19
1	1140600	1140800	E5
1	1140800	1141200	E4
1	1141200	1141400	E5
1	1141400	1141600	E19
1	1141600	1141800	E9
1	1141800	1142200	E8
1	1142200	1142800	E4
1	1142800	1143000	E5
1	1143000	1143600	E19
1	1143600	1145200	E9
1	1145200	1145400	E19
1	1145400	1145600	E9
1	1145600	1146000	E19
1	1146000	1146400	E5
1	1146400	1147600	E19
1	1147600	1147800	E2
1	1147800	1148000	E3
1	1148000	1148200	E4
1	1148200	1148400	E5
1	1148400	1148800	E19
1	1148800	1149200	E9
1	1149200	1150800	E10
1	1150800	1151000	E11
1	1151000	1151400	E10
1	1151400	1151600	E11
1	1151600	1153800	E7
1	1153800	1154000	E4
1	1154000	1154600	E5
1	1154600	1155400	E19
1	1155400	1156400	E11
1	1156400	1156800	E6
1	1156800	1157800	E4
1	1157800	1159200	E19
1	1159200	1160000	E1
1	1160000	1160200	E19
1	1160200	1160600	E12
1	1160600	1161000	E20
1	1161000	1161400	E18
1	1161400	1161600	E19
1	1161600	1162000	E2
1	1162000	1163200	E19
1	1163200	1163800	E9
1	1163800	1164200	E8
1	1164200	1164400	E4
1	1164400	1164800	E5
1	1164800	1165200	E19
1	1165200	1165400	E3
1	1165400	1166200	E4
1	1166200	1166400	E6
1	1166400	1166600	E2
1	1166600	1166800	E19
1	1166800	1167000	E5
1	1167000	1167600	E19
1	1167600	1168000	E2
1	1168000	1168800	E3
1	1168800	1175000	E19
1	1175000	1176400	E1
1	1176400	1176600	E19
1	1176600	1177400	E2
1	1177400	1178400	E11
1	1178400	1179600	E19
1	1179600	1181200	E11
1	1181200	1182800	E7
1	1182800	1183200	E6
1	1183200	1183600	E4
1	1183600	1184000	E19
1	1184000	1184400	E2
1	1184400	1184600	E12
1	1184600	1185000	E17
1	1185000	1185400	E12
1	1185400	1185600	E19
1	1185600	1185800	E9
1	1185800	1187200	E10
1	1187200	1187600	E8
1	1187600	1187800	E4
1	1187800	1188400	E5
1	1188400	1189200	E19
1	1189200	1190000	E9
1	1190000	1190400	E8
1	1190400	1191400	E5
1	1191400	1191600	E19
1	1191600	1192200	E4
1	1192200	1192400	E6
1	1192400	1193200	E8
1	1193200	1193800	E9
1	1193800	1194200	E20
1	1194200	1194400	E17
1	1194400	1195200	E18
1	1195200	1195400	E20
1	1195400	1198200	E19
1	1198200	1198400	E5
1	1198400	1199000	E4
1	1199000	1199200	E6
1	1199200	1199400	E8
1	1199400	1200600	E10
1	1200600	1201400	E9
1	1201400	1202200	E19
1	1202200	1203000	E5
1	1203000	1203200	E4
1	1203200	1204400	E8
1	1204400	1204600	E9
1	1204600	1205200	E10
1	1205200	1205800	E9
1	1205800	1207200	E19
1	1207200	1208000	E2
1	1208000	1210400	E1
1	1210400	1211000	E2
1	1211000	1211200	E19
1	1211200	1212000	E2
1	1212000	1213000	E11
1	1213000	1214000	E19
1	1214000	1214400	E11
1	1214400	1214800	E2
1	1214800	1216000	E19
1	1216000	1216400	E5
1	1216400	1216800	E4
1	1216800	1217000	E6
1	1217000	1217200	E8
1	1217200	1217400	E9
1	1217400	1218200	E19
1	1218200	1219400	E11
1	1219400	1221600	E19
1	1221600	1222200	E1
1	1222200	1223000	E2
1	1223000	1223200	E1
1	1223200	1224000	E19
1	1224000	1224200	E1
1	1224200	1224400	E2
1	1224400	1226600	E19
1	1226600	1226800	E5
1	1226800	1227200	E4
1	1227200	1227400	E6
1	1227400	1227800	E7
1	1227800	1229200	E8
1	1229200	1229800	E9
1	1229800	1230000	E10
1	1230000	1230200	E11
1	1230200	1230400	E19
1	1230400	1230800	E9
1	1230800	1231600	E19
1	1231600	1231800	E2
1	1231800	1232200	E3
1	1232200	1232400	E2
1	1232400	1232600	E19
1	1232600	1233200	E2
1	1233200	1234400	E19
1	1234400	1234600	E9
1	1234600	1235000	E8
1	1235000	1235200	E6
1	1235200	1236000	E4
1	1236000	1236800	E19
1	1236800	1238400	E2
1	1238400	1239000	E3
1	1239000	1240400	E19
1	1240400	1241200	E4
1	1241200	1241600	E8
1	1241600	1241800	E9
1	1241800	1242600	E19
1	1242600	1243000	E5
1	1243000	1243200	E4
1	1243200	1244800	E19
1	1244800	1246000	E1
1	1246000	1246400	E19
1	1246400	1246600	E2
1	1246600	1247000	E19
1	1247000	1248800	E2
1	1248800	1249600	E19
1	1249600	1250000	E12
1	1250000	1250800	E17
1	1250800	1251000	E12
1	1251000	1251200	E19
1	1251200	1251800	E2
1	1251800	1252200	E19
1	1252200	1252800	E2
1	1252800	1253200	E19
1	1253200	1254200	E11
1	1254200	1254800	E19
1	1254800	1255400	E11
1	1255400	1255600	E19
1	1255600	1256000	E2
1	1256000	1256200	E19
1	1256200	1257000	E2
1	1257000	1257400	E19
1	1257400	1257600	E2
1	1257600	1258000	E19
1	1258000	1258400	E2
1	1258400	1258800	E19
1	1258800	1259000	E9
1	1259000	1259800	E11
1	1259800	1260600	E7
1	1260600	1261000	E6
1	1261000	1261400	E4
1	1261400	1261800	E19
1	1261800	1262800	E2
1	1262800	1264600	E11
1	1264600	1266000	E19
1	1266000	1268200	E11
1	1268200	1269600	E19
1	1269600	1270400	E11
1	1270400	1270800	E19
1	1270800	1272400	E1
1	1272400	1274600	E19
1	1274600	1275200	E1
1	1275200	1275800	E19
1	1275800	1276800	E12
1	1276800	1277000	E19
1	1277000	1277200	E1
1	1277200	1279400	E19
1	1279400	1280800	E2
1	1280800	1281200	E19
1	1281200	1281400	E12
1	1281400	1282800	E19
1	1282800	1284400	E9
1	1284400	1284600	E8
1	1284600	1285600	E7
1	1285600	1286000	E6
1	1286000	1286400	E4
1	1286400	1286600	E5
1	1286600	1286800	E19
1	1286800	1287000	E12
1	1287000	1287200	E19
1	1287200	1287800	E1
1	1287800	1288800	E2
1	1288800	1289000	E19
1	1289000	1289600	E12
1	1289600	1289800	E19
1	1289800	1290400	E8
1	1290400	1290800	E4
1	1290800	1291400	E5
1	1291400	1291800	E4
1	1291800	1292600	E5
1	1292600	1293200	E9
1	1293200	1295000	E19
1	1295000	1298200	E11
1	1298200	1298400	E6
1	1298400	1298800	E4
1	1298800	1299000	E5
1	1299000	1299800	E19
1	1299800	1300800	E1
1	1300800	1301400	E2
1	1301400	1302800	E1
1	1302800	1303800	E19
1	1303800	1304800	E9
1	1304800	1305600	E2
1	1305600	1307400	E19
1	1307400	1308000	E2
1	1308000	1310400	E19
1	1310400	1310800	E1
1	1310800	1311800	E19
1	1311800	1312000	E1
1	1312000	1313600	E19
1	1313600	1314400	E5
1	1314400	1315200	E8
1	1315200	1315600	E9
1	1315600	1316400	E19
1	1316400	1317000	E2
1	1317000	1320400	E11
1	1320400	1321200	E19
1	1321200	1321800	E2
1	1321800	1322000	E19
1	1322000	1322400	E4
1	1322400	1322600	E6
1	1322600	1323200	E7
1	1323200	1324000	E11
1	1324000	1324600	E10
1	1324600	1325400	E19
1	1325400	1325600	E2
1	1325600	1325800	E19
1	1325800	1328600	E11
1	1328600	1329200	E7
1	1329200	1329800	E11
1	1329800	1330000	E7
[truncated: 159,038 more rows]
