# Supplementary material for: Characterization of DNA methylation reader proteins in Arabidopsis thaliana
Source: HighWire-hosted journal article supplement (doi:10.1101/gr.279379.124), 2024-12-01
Supplement: Supplemental_Tables_S1-S9_.xlsx [file Supplemental_Tables_S1-S9_.xlsx]

## Sheet: Supp_Table1
Supplemental Table 1. List of mC reader proteins enriched in binding to methylated probes and previous literature knowledge.
#	AGI	Name	mCG	mCHG	mCHH	Known binding	PMID
1	At1g73100	SUVH3	+	+	+	mCG, mCHG, mCHH	11691919; 12805620; 15775980; 30523112
2	At2g33290	SUVH2	+	+	+	mCG	11691919; 12805620; 15775980; 19043555
3	At5g04940	SUVH1	+	+	+	mCG, mCHG, mCHH	11691919; 12805620; 15775980; 30523112
4	At2g35160	SUVH5	+	+	+	mCG, mCHG, mCHH	11691919; 12805620; 15775980; 21245167
5	At5g25475	-	+	+	+	n.d.	NA
6	At1g66050	VIM2	+	+	.	hemi-mCG, mCG, mCHG	17242155; 17239600; 22459921
7	At1g57820	VIM1	+	+	.	hemi-mCG, mCG, mCHG	17242155; 17239600; 22459921
8	At5g39550	VIM3	+	+	.	hemi-mCG, mCG, mCHG	17242155; 17239600; 22459921
9	At2g24740	SUVH8	+	+	.	n.d.	11691919; 12805620; 15775980
10	At4g22745	MBD1	+	.	+	does not bind mC	12787239; 12954765; 14605234; 15010609
11	At3g23060	BMI1C	+	.	+	n.d.	NA
12	At1g76440	IDL3	+	.	.	n.d.	28452714
13	At1g54850	IDL2	+	.	.	n.d.	28452714
14	At5g35330	MBD2	+	.	.	does not bind mC	12787239; 12954765; 14605234; 15010609
15	At5g59380	MBD6	+	.	.	mCG	12787239; 12954765; 14605234; 15010609
16	At1g56590	ZIP4	+	.	.	n.d.	NA
17	At3g46580	MBD5	+	.	.	mCG, mCHH	12787239; 12954765; 14605234; 15010609
18	At4g13460	SUVH9	+	.	.	mCHH	11691919; 12805620; 15775980; 19043555
19	At5g27670	HTA7	+	.	.	n.d.	NA
20	At3g63030	MBD4	+	.	.	does not bind mC	12787239; 12954765; 14605234; 15010609
21	At3g09500	RPL35A	+	.	.	n.d.	NA
22	At1g28420	RLT1	+	.	.	n.d.	NA
23	At5g22880	HTB2	+	.	.	n.d.	NA
24	At5g15810	TRM1B	+	.	.	n.d.	NA
25	At3g43590	-	+	.	.	n.d.	NA
26a	At5g66730	ENY	+	-	.	n.d.	NA
26b	At5g03150	JKD	+	-	.	n.d.	NA
27	At1g31150	-	.	+	.	n.d.	NA
28	At2g22740	SUVH6	.	+	.	mCG, mCHG, mCHH	11691919; 12805620; 15775980; 17239600; 30523112
29	At2g01710	DNAJ2	.	+	.	n.d.	30523112
30	At4g09040	CP33C	.	+	.	n.d.	NA
31	At1g73360	HDG11	.	+	.	DNA	19132376
32	At3g45980	HTB9	.	+	.	n.d.	NA
33	At5g13960	SUVH4/KYP	.	+	.	mCG, mCHG, mCHH	11691919; 12805620; 15775980; 17239600; 30523112
34	At1g25260	RDP1	.	+	.	n.d.	NA
35	At1g17920	HDG12	.	+	.	n.d.	NA
36	At5g11480	ENGB-2	.	.	+	n.d.	NA
n.d. no data
The peptides identified enriched in mCG and in non-mCHG could match to either or both proteins 26a and 26b.
11691919	Baumbusch, L. O. et al. The Arabidopsis thaliana genome contains at least 29 active genes encoding SET domain proteins that can be assigned to four evolutionarily conserved classes. Nucleic Acids Res. 29, 4319–4333 (2001).
12805620	Springer, N. M. et al. Comparative analysis of SET domain proteins in maize and Arabidopsis reveals multiple duplications preceding the divergence of monocots and dicots. Plant Physiol. 132, 907–925 (2003).
15775980	Naumann, K. et al. Pivotal role of AtSUVH2 in heterochromatic histone methylation and gene silencing in Arabidopsis. EMBO J. 24, 1418–1429 (2005).
19043555	Johnson, L. M., Law, J. A., Khattar, A., Henderson, I. R. & Jacobsen, S. E. SRA-domain proteins required for DRM2-mediated de novo DNA methylation. PLoS Genet. 4, (2008).
21245167	Rajakumara, E. et al. A dual flip-out mechanism for 5mC recognition by the Arabidopsis SUVH5 SRA domain and its impact on DNA methylation and H3K9 dimethylation in vivo. Genes Dev. 25, 137–152 (2011).
17242155	Woo, H. R., Pontes, O., Pikaard, C. S. & Richards, E. J. VIM1, a methylcytosine-binding protein required for centromeric heterochromatinization. Genes Dev. 21, 267–277 (2007).
17239600	Johnson, L. M. et al. The SRA Methyl-Cytosine-Binding Domain Links DNA and Histone Methylation. Curr. Biol. 17, 379–384 (2007).
22459921	Yao, Q., Song, C.-X., He, C., Kumaran, D. & Dunn, J. J. Heterologous expression and purification of Arabidopsis thaliana VIM1 protein: In vitro evidence for its inability to recognize hydroxymethylcytosine, a rare base in Arabidopsis DNA. Protein Expr. Purif. 83, 104–111 (2012).
12787239	Zemach, A. & Grafi, G. Characterization of Arabidopsis thaliana methyl-CpG-binding domain (MBD) proteins. Plant J. 34, 565–572 (2003).
12954765	Berg, A. et al. Ten members of the Arabidopsis gene family encoding methyl-CpG-binding domain proteins are transcriptionally active and at least one, AtMBD11, is crucial for normal development. Nucleic Acids Res. 31, 5291–5304 (2003).
14605234	Ito, M., Koike, A., Koizumi, N. & Sano, H. Methylated DNA-binding proteins from Arabidopsis. Plant Physiol. 133, 1747–54 (2003).
15010609	Scebba, F. et al. Arabidopsis MBD proteins show different binding specificities and nuclear localization. Plant Mol. Biol. 53, 715–731 (2003).
28452714	Li, D. et al. The MBD7 complex promotes expression of methylated transgenes without significantly altering their methylation status. Elife 6, e19893 (2017).
19132376	Nakamura, M. et al. Characterization of the Class IV Homeodomain-Leucine Zipper Gene Family in Arabidopsis. Plant Physiol. 141, 1363–1375 (2006).
30523112	Harris C. J. et al. A DNA methylation reader complex that enhances gene transcription. Science. 362, 1182–1186 (2018)

## Sheet: Supp_Table2
Supplemental Table 2. List of proteins statistically enriched in at least one set of probes (Anova) and their enrichment value in each replicate of the DNA pull-down (Figure 1b).
List of protein IDs were given when peptides could not be matched more precisely.
Names	CG1	CG2	CG3	CGmethyl1	CGmethyl2	CGmethyl3	CHG1	CHG2	CHG3	CHGmethyl1	CHGmethyl2	CHGmethyl3	CHH1	CHH2	CHH3	CHHmethyl1	CHHmethyl2	CHHmethyl3
A1A6K6;F4I435	9.71465	9.70292	9.47551	10.0196	9.97731	9.89339	0.233696	0.0213489	0.0877686	-0.0213489	-0.048624	-0.0739822	-0.262468	-0.367737	-0.343788	-0.406021	-0.113174	-0.330162
F4J4T1;A1L4X7	0.705315	0.295851	-0.295851	-1.06407	-0.917654	1.90407	-0.4711	-0.672268	-0.610487	-0.713125	-0.738607	-0.763912	4.41776	4.49429	3.77312	4.09909	4.03383	4.29218
At4g09050	1.17077	1.46972	-0.0788307	-1.06192	-1.1933	-0.602547	-0.512958	-0.985743	-0.864899	3.68096	3.18526	3.32228	-1.39468	-1.50831	0.0788307	0.39167	0.290722	0.0806808
C0SUU6	1.43475	2.44201	1.93939	-0.727037	-0.626041	-0.436342	1.8429	2.23239	1.9648	-0.330984	-0.236765	-0.256689	0.236763	0.335518	0.559936	-0.935451	-1.03376	-0.390078
C0SVH8	-0.219574	0.169159	0.202805	-1.24587	-0.78504	-1.51652	5.61314	5.71964	5.44001	-1.2208	-0.881798	-0.169161	0.251789	-1.64267	-0.242601	0.310513	0.184832	0.226049
F4HP69	0.765272	0.359756	0.0387936	-0.687426	-0.261215	-0.0387936	-1.44079	-1.20121	-1.02586	-0.814236	-0.889702	-0.761883	0.967207	1.11048	1.23141	0.907639	0.863136	0.980391
F4I7J9;F4I7K0;Q94HW1	0.96714	0.36923	0.0584259	-0.283615	-0.0584259	-0.112938	-1.32557	-0.962727	-1.25354	-0.797939	-0.706448	-0.844088	0.859377	1.11735	1.27422	0.896677	1.08783	0.85692
F4IXX3;F4IXX2	0.407642	0.214634	0.0142269	-0.197744	-0.014225	-0.134602	-1.23502	-0.983788	-0.958403	-0.931561	-0.646908	-0.794739	0.970116	1.18385	1.50826	0.941698	0.941172	0.845505
TGA6	0.05756	0.325195	0.171295	-0.16707	0.0785923	0.0967121	-0.686605	-0.37001	-0.382063	-1.4738	-1.60317	-1.61106	0.44013	0.60459	0.917831	-0.0714569	0.319277	-0.05756
GRF1	2.52131	2.72656	2.81155	-0.316307	-0.499634	-0.427935	0.0133858	-0.0933971	-0.165598	-2.47788	-1.67794	-1.04482	0.402134	-0.0133858	0.0284367	0.471264	0.245003	0.55855
Q680D9;F4JWT6	-2.18871	-2.34567	-3.18449	1.4036	0.459063	1.27778	-3.36724	-4.60744	-1.61148	3.10179	3.01186	3.2779	-1.18421	-0.459063	-1.06286	4.79352	4.33093	4.40913
F4K4H9;F4K4G6	1.69736	2.07698	0.314291	-1.96405	-0.7766	-1.02662	6.33882	6.79911	6.53655	0.0428257	-0.0428257	0.826038	-1.3375	0.211435	-1.38092	-1.19506	-0.140078	-0.586683
F4KFB3	-0.665502	-1.44562	-1.79183	0.958303	0.804987	0.665502	-2.40262	-3.38741	-2.56908	-2.66874	-2.58523	-1.30816	1.08866	1.52006	1.22238	1.64533	1.80106	2.04982
MSI4	0.818527	0.271601	-0.624519	-0.130388	-0.319126	0.130388	-1.80446	-1.24675	-1.1611	-1.1848	-1.02061	-0.878662	1.16279	1.0992	1.02087	1.77799	1.86	1.62855
SUVH2	-1.90853	-2.08646	-2.68245	4.3559	3.56801	4.25634	-1.16353	-2.80904	-3.12078	4.66659	4.62688	4.46445	-2.56738	-2.22931	-3.55376	1.16353	1.21025	1.99996
WRKY23	0.681988	0.503355	0.745256	-1.1612	-0.137587	-0.466011	-0.139587	0.814001	-0.315428	-0.00400352	-0.187141	0.962179	4.71524	4.69041	4.78604	0.00400352	-1.52541	-1.06244
A_IG005I10.6	1.15166	1.50922	1.93677	-0.488254	-0.525877	-0.671192	2.04634	2.41309	2.07236	-0.44939	-0.337187	0.140499	-0.0348148	0.06534	0.0348167	-1.21648	-1.39004	-1.22515
SUVH5	-0.835932	-1.73257	-0.475635	3.65724	4.04766	3.48162	-3.03293	-2.4844	-3.353	3.63193	3.63565	3.77516	-2.39467	-2.84992	-2.23003	0.627602	0.617846	0.475635
RPB205	1.06988	0.707398	0.598574	0.469635	0.632082	0.668146	-1.90646	-2.21422	-2.08241	-1.41114	-1.19258	-1.21886	-0.260387	-0.0412064	-0.11356	0.285952	0.30797	0.0412064
RPB135	0.943218	0.409178	0.504108	0.256016	0.592352	0.599073	-1.69095	-1.79444	-1.72037	-1.23948	-1.17672	-1.12344	-0.116318	-0.07024	-0.0637855	0.208422	0.0637875	0.22377
ARP	4.38327	3.34472	4.59159	-4.88891	-2.15989	-2.2698	1.60842	1.34243	0.966799	-0.966797	-1.35423	-1.32925	1.9967	2.28713	2.76133	-1.67266	-2.84321	-1.83788
RPL32A	-2.83474	-2.96253	-2.02701	0.157042	-0.171652	-0.12158	0.161072	0.377636	-0.00130844	0.381227	0.455854	0.532684	0.215101	-0.134375	-0.328485	0.00130653	-0.67474	0.0134125
RPL26A	-2.96041	-2.23634	-1.98262	0.14921	0.274408	0.13205	-0.251854	0.063858	-0.063858	0.235359	0.476269	0.376709	-0.223217	-0.448019	-0.38003	0.186016	-0.275547	0.111549
PARP2	0.665255	-0.0413055	0.0413055	-0.780151	-0.525204	0.0741634	1.79716	1.89504	1.74534	1.5193	1.48293	1.32588	-0.467346	-0.300964	-0.364769	-0.376171	-0.796892	-0.668413
MAG	1.58528	1.12313	0.80757	-0.592541	-0.639065	-0.2819	-1.23476	-1.16517	-1.13811	0.123312	-0.0500393	0.163593	-0.263207	-0.120968	0.0500393	0.711927	0.853293	0.537794
HON5	-0.186871	-0.412632	-0.337673	0.122787	-0.0375004	0.1943	-1.42731	-1.37237	-2.08838	-0.149469	-0.705885	0.0375004	4.70786	4.91571	4.38018	4.6144	4.54687	5.08731
MBD1	1.73064	-0.587423	-2.30203	6.25389	6.57835	6.32255	-1.68546	-3.61307	-0.930965	-0.193146	0.399752	0.193144	-1.69957	-1.76634	-3.59068	2.45837	1.85719	2.34163
Q84K79	0.888413	-0.21797	-0.110409	7.17704	7.0115	7.52205	1.06733	1.174	0.659327	-0.107676	-3.08149	-1.89252	0.107676	-0.886389	-0.589203	-0.776375	0.20747	-0.490036
GATA24;GATA28	0.631866	0.32896	0.589466	-1.3858	-0.64366	-2.39567	2.20977	2.09329	1.92518	1.49436	1.78254	2.16683	-0.637241	-0.81781	-0.701252	-0.32896	-1.27938	-0.872074
SUVH4	-0.764385	-0.81925	-1.04596	1.00404	1.26716	1.30465	-1.18328	-0.797867	-1.00339	2.5661	2.50518	2.58549	-0.751019	-0.496424	-0.285639	0.285637	0.446388	0.406855
Q8L641	0.104673	0.973629	1.75593	-0.677862	-0.947462	-0.667923	-0.6213	-1.48877	-0.585081	-0.388264	-0.104673	-0.517614	2.4925	2.38998	2.41397	2.3061	2.2582	2.34218
MBD2	0.258749	0.606716	-0.780115	6.99955	7.1863	6.94852	-0.496391	-0.753767	0.16655	0.305332	0.951178	1.13732	-0.16655	-0.444414	-0.98012	-2.39421	-0.47422	-1.29818
GATA1	-1.32213	-1.06907	0.0925026	-0.0925026	0.180658	0.119228	1.34215	1.57014	1.59685	1.72834	1.62257	1.26545	-4.97743	-3.86075	-6.91658	-5.35661	-5.68151	-6.65078
ORTH2	1.86671	1.19403	-1.01502	5.94731	6.43365	6.28504	-1.53221	-1.90034	0.264187	6.01076	6.00248	6.0609	-0.264187	-0.361633	-0.454388	-0.844364	-0.723143	-0.597504
SUVH6	0.669008	0.0272884	-0.088068	-0.0286922	0.101317	0.0823975	-2.88717	-2.79496	-3.58515	1.66733	1.35377	1.46147	-1.49249	-1.33889	-1.21032	-0.0272884	0.206284	0.09272
MTG13.7	4.46178	3.92169	4.52592	-0.797182	0.451998	0.00186729	1.45291	1.71744	1.52953	-0.0326538	-0.0855541	0.214464	-0.783159	-0.814461	-0.131271	-0.778244	-0.881449	-0.00186539
Q94AD1;Q3ECU3	-2.42538	-2.41707	-0.697439	0.104673	0.221844	0.218908	-0.760344	-0.498917	-0.624529	-0.558998	-0.332434	-0.104673	1.94068	1.80438	1.58413	2.02602	1.66624	2.23235
Q9ASZ1	-0.576826	-0.830328	-1.91713	-0.32474	-2.4379	-0.549686	4.34621	4.46134	4.35899	4.14237	4.73091	4.07822	-0.478256	0.536345	-0.050581	0.239815	0.0505791	-0.565828
NAC081	-0.538315	-0.756185	-0.363632	-0.781235	-0.368341	-0.403959	-0.474632	-0.280987	-0.410402	1.02855	1.07313	0.994686	0.930212	1.27708	1.23978	0.420452	0.280989	0.537598
SUVH8	-1.94697	-3.24198	-3.51316	1.74152	1.79037	1.70165	-2.92104	-3.41347	-5.37217	1.02872	1.63332	1.43029	-0.118072	-0.997644	-0.263926	0.665733	0.176386	0.118072
SUVH3	-3.95697	-4.49254	-5.53192	4.4656	5.11365	4.62197	-4.41856	-6.14912	-6.66563	6.55315	4.97685	4.87362	-2.84504	-2.98441	-4.13325	2.84917	4.2942	2.84504
F8A12.7	1.52707	1.16127	1.04699	-0.360888	-0.42275	-0.0892658	-0.000747681	0.284237	0.000747681	-0.471069	-0.74991	-0.74341	1.14297	1.48765	1.62147	-0.107784	0.130381	-0.132961
F7O12.5	0.149227	1.3623	0.74268	-1.10249	-2.01697	-0.149225	-0.773464	-0.456945	-1.04561	-0.31996	-1.45282	-2.04285	2.56031	2.19259	2.50587	3.27142	2.87952	3.50081
ORTH4;ORTH5	-0.203928	0.279221	0.374536	8.1454	7.54785	7.43161	-2.98105	-2.93077	-2.42244	7.71566	7.68677	7.57141	-3.66562	0.0243969	-0.0243988	-1.58822	-2.53838	-1.0016
T9J14.7	-0.712851	0.0621147	0.767199	0.0169716	-0.0554104	-0.0169716	-1.64659	-0.895632	-0.915716	-1.12782	-1.0043	-0.594664	1.54992	1.81934	1.8303	1.67561	1.56279	1.74052
SUVH1	-2.95564	-2.90223	-3.1763	2.38095	2.43969	2.9862	-4.6532	-4.89042	-3.54458	6.29762	6.01102	6.19626	-2.38095	-2.56178	-2.93763	3.33152	3.58021	3.47603
Q9FFC0	-2.47937	-3.13479	-3.3422	0.176981	0.325476	-0.0641232	-0.909521	-0.300352	-0.741062	-0.192568	0.0222797	0.122873	0.429705	0.264193	0.724571	0.332901	0.242834	-0.0222797
PTAC15	-1.20229	-1.15874	-1.61042	0.0545177	0.207285	0.152803	-1.90249	-1.41393	-1.88688	-0.238976	-0.0545177	-0.0666695	0.882019	0.9354	1.29283	0.539181	0.570015	0.423714
ANAC087	-0.306341	-0.726231	-0.566086	-0.963171	-1.1774	-0.958517	1.27959	1.28164	1.27706	-0.508129	0.067461	-0.067461	0.682096	0.890513	1.07203	0.145569	0.225456	-0.224943
ORTH1	0.869459	-0.205934	1.83501	5.99367	6.32298	6.26974	-0.0258522	-0.206882	-0.171957	5.95029	5.8814	6.04142	-1.32535	-1.46073	0.0258522	-0.770779	-1.58939	-0.251024
Q9FNE4	-0.152208	0.0291901	-0.479841	0.299675	-0.0291882	0.328495	-1.83263	-1.45982	-1.18736	-1.16358	-1.1451	-0.634827	0.846232	1.15971	0.874729	1.67231	1.72854	1.58304
Q9FNN6	0.254934	0.611881	0.0425148	-0.478811	-0.533771	-0.289238	4.48386	4.13775	4.51885	1.91987	1.54549	1.72291	-0.635498	-1.94984	-0.0425167	-0.704609	-0.933123	-0.254019
RECQL1	0.0223599	0.352234	1.12292	-0.440111	-0.0223599	-0.164911	2.39119	3.03927	2.76802	2.48947	2.12662	2.42547	-2.08039	-0.652153	-2.36191	-2.21647	-1.76659	-1.86627
HDG11	-2.54051	-2.28535	-1.24823	-2.9007	-4.01356	-3.3912	-3.26267	-3.452	-1.71448	1.37665	1.24823	1.49154	3.45109	3.88262	3.38172	3.10776	3.04894	3.77997
WRKY75	-0.0916119	-0.0617886	0.299835	-0.736267	0.83959	-0.777479	1.28897	1.52297	0.548445	-0.459593	-0.034399	0.034399	4.11823	3.99692	3.79675	-0.0536365	-0.64245	-1.2115
F22J12_30	-3.18334	-3.46033	-2.90884	0.00813484	-0.849657	-0.128511	-0.0701408	0.179129	-0.0181541	-0.00813675	0.0999355	0.0931797	0.230255	0.2232	-0.11198	0.417751	0.411077	0.741001
NF-YC11	-0.811417	-1.07917	-1.54285	-1.90216	-1.73985	-1.48461	1.15926	1.26046	0.95212	0.393503	0.0704784	0.00393105	-0.204962	0.166195	0.451427	-0.00393105	-0.0582695	0.124708
Q9LJ94	-1.64136	-0.522213	-0.846115	1.26434	1.21501	1.12516	-1.71808	-1.15374	-1.53181	0.522213	0.686409	0.861776	-0.796629	-0.840565	-0.786404	0.991331	0.83082	1.18671
HDG12	-1.33456	-1.85099	-1.11576	-2.95822	-2.81151	-2.35646	-1.40362	-2.79537	-2.00091	1.11576	1.16914	1.48329	3.09459	3.46036	2.83805	3.17246	2.86354	3.83389
NF-YC10	-2.5303	-1.24449	-2.68852	0.547722	0.487755	0.634741	-0.232828	0.466669	0.0748367	1.64924	1.89391	1.81272	-0.314156	-0.187771	-0.404051	-0.0748367	-0.25098	0.105328
Q9LS86	0.608879	0.904953	-0.107023	3.23074	3.41137	4.80451	-0.612228	0.107025	-0.180058	-1.39763	-1.25167	-0.599825	-0.65403	-0.991749	-0.807968	1.84948	1.82338	1.9723
Q9LSA5	0.0307274	-0.22571	0.191879	0.828388	1.14383	0.940643	0.0374069	-0.0102272	-0.0434151	0.0147552	0.0102291	0.183231	-1.63717	-1.10943	-1.05725	-0.866301	-0.667898	-0.883009
HON4	-0.0812473	0.141413	-0.35977	-0.0648689	0.161892	0.064867	-0.680742	-0.719378	-0.599474	-0.676876	-0.31617	-0.328527	3.09684	3.52846	3.0893	3.07908	2.99854	3.36289
MBD6	0.417643	1.15122	-0.227982	6.71298	7.01659	6.95326	-0.269653	-0.353533	0.117153	0.142717	-0.184248	-0.594927	-0.0980282	0.0892467	-1.0188	0.74181	-0.0892467	-0.919581
Q9LVH1	-2.31601	-2.04591	-1.64174	0.27916	-0.340494	0.245716	-1.04861	-0.482061	-0.361919	-0.550053	-0.116869	0.116869	0.508478	0.604286	0.370688	1.38032	1.08471	1.48301
F18O22_70	0.61907	-0.00387764	0.00387764	-1.1703	-1.32838	-0.581589	2.92196	3.30671	3.33372	2.51311	2.51827	2.45418	-0.639055	-0.780647	0.114683	-0.744738	-1.36745	-0.892948
F14F18_180	1.25437	-0.068285	-0.0405083	-0.715805	-0.175226	-0.238203	3.54797	3.90369	3.34374	4.02543	4.18839	4.13917	-0.578546	-0.222603	-0.361389	0.123369	-0.0290909	0.0290909
HDG1	-2.53938	-3.92389	-2.50007	-2.42031	-3.37555	-4.39407	-1.9892	-1.93901	-0.463373	1.0422	0.463371	1.35095	2.86029	3.34392	1.91248	2.91612	2.97182	2.95012
F16B3.3	-1.65009	-1.41401	-1.83942	0.610607	0.211624	0.551628	-2.72135	-1.18419	-0.681648	-0.850901	-1.21092	-0.211622	3.17987	3.96733	2.70116	3.53736	3.55125	3.65019
F14G6.4	1.55603	0.651405	-0.318146	7.87216	7.83303	7.95822	-1.08577	-0.57299	-0.00440979	-0.202953	-1.38888	-0.155323	0.49892	0.418984	-1.3017	0.879177	-0.415237	0.00440788
F28K20.8	0.581938	0.242994	0.816666	-1.15711	-0.508999	-1.26439	0.127295	-0.540848	-0.0647354	6.14218	6.24773	5.99312	0.0399704	-0.0399685	-0.698675	-0.715692	0.0530987	-0.741032
Q9SB42	-0.0332909	0.033289	1.00705	-0.448236	-0.605984	-0.761965	2.06255	2.44236	2.1972	-0.35182	-0.139034	0.0926323	0.112757	0.243317	0.134083	-0.862795	-0.949707	-0.930349
T3A5.80	-2.28597	-3.06383	-2.64759	0.0125771	-0.012579	-0.164474	2.23339	2.42853	2.16408	0.0515022	0.217997	0.168419	-0.61648	-0.438637	-0.711748	0.104309	0.170487	-0.126173
MBD9	8.85479	8.52711	8.45888	0.135721	-0.657442	-0.966898	1.22392	-1.10535	-0.135721	-0.157745	0.296358	0.406532	0.783209	-0.540592	-0.902346	-0.98383	0.143221	-0.275225
WRKY1	1.00635	0.299328	0.0884113	-0.156561	-0.257753	-1.81278	-0.0276508	-0.901043	-1.02077	0.0276508	0.31802	-0.511951	6.59318	6.7962	6.84943	-1.05692	0.932842	-0.451385
BLH1	-2.44097	-1.84283	-0.412161	0.692543	1.03534	1.02431	-2.066	-3.02852	-2.71752	-2.74604	-2.95399	-3.35476	0.469036	0.415657	0.412161	0.673241	0.587519	0.768738
MBD5	1.24155	0.493607	-0.620255	5.95858	6.26579	6.07104	0.0625687	-0.781887	-0.11837	-0.239616	-0.0625687	-0.973337	-0.367716	0.709095	-0.237772	-0.408167	0.319357	0.591543
REF6	1.40832	1.36031	0.863966	0.641878	-0.587067	1.16636	4.46404	5.1067	4.71029	-0.0443535	-0.0252495	-0.0950012	0.020792	-1.26866	-1.15826	-1.91782	-0.020792	-1.16057
WRKY7	0.924284	0.311598	0.978869	-0.97632	0.00777245	-0.917099	-0.333666	0.359354	-0.590759	-0.597998	-0.00777245	-0.650412	4.07896	4.32824	4.42605	-1.1679	0.971312	-0.402605
T13M11.9	1.39472	1.55023	1.41594	-0.679241	-0.665558	-0.72394	1.48887	1.76172	1.50726	-0.292896	-0.252665	-0.165832	0.165834	0.287847	0.335211	-0.810537	-0.72921	-0.781567
SUVH9	-3.15251	-1.22794	-0.349423	3.11169	3.1569	3.20888	0.539635	0.616127	0.349421	3.10685	2.59833	2.77578	-4.83431	-4.01306	-3.74255	-1.10808	-2.07854	-1.51685
WRKY3	-0.0497494	-0.202713	0.436239	0.771875	0.142851	0.519037	-0.782066	0.0497475	-0.643921	-0.495575	0.112949	-0.50839	5.33904	5.05797	5.55542	-0.901869	-0.0760078	-0.906586
Q9ZU99	-1.00295	-1.95985	-1.67899	0.697836	0.843044	0.680075	-4.03714	-3.01847	-3.44971	1.20752	0.927666	1.05349	-0.630158	-0.801222	-0.53297	0.628248	0.53297	0.625069

## Sheet: Supp_Table3
Supplemental Table 3. List and characteristics of complemented mutant lines generated in this study.
Mutant lines for MBD4 and MBD5 labeled '-cr' were generated with CRISPR/Cas9 (see Material and methods).
Bait	Background	T2 Line ID	Expression level (T1 pop vs WT)	number of insert (T2 pop)		Experiments
				estimation	resistance ratio	ChIP	TAP-Set1	TAP-Set2
-	Col-0	-	1	0	0	rep1	rep1	rep1
SUVH1	SALK_003675 (N859507)	#1.8	1.35	1	75% (63/84)	rep2	-	-
		#7.2	5.15	3+	95% (94/99)	rep1	rep2	rep1; rep2
		#10.1	1.48	1	75% (60/80)	-	rep1	-
SUVH3	SAIL_401_D01 (N878938)	#6.7	6.6	3+	98% (92/94)	rep1	-	rep1
		#16.8	0.5	1	77% (143/186)	rep2	-	rep2
MBD1	SALK_025352 (N525352)	#6.2	1.15	1	76% (70/92)	rep2	rep1	rep1
		#6.6	1.15	1	76% (70/92)	-	-	rep2
		#6.10	1.15	1	76% (70/92)	rep1	-	-
MBD2	GABI_650A05 (N462309)	#5.4	3.74	1	72% (135/188)	rep1	rep1	rep1
		#6.5	0.75	1	75% (117/155)	rep2	-	rep2
MBD4	mbd4-cr	#15.9	1.6	1	76% (90/119)	-	-	rep1
		#16.9	1.9	1	73% (98/135)	rep1	-	rep2
		#16.9.x	1.9	1	73% (98/135)	rep2	-	-
MBD5	mbd5-cr	#3.10	4.5	1	75% (89/118)	rep1	-	rep1
		#15.3	14	3+	98% (110/112)	rep2	-	rep2
MBD6	SALK_043927 (N543927)	#4.8	12.39	3+	96% (112/117)	rep1	rep1	rep1
		#14.1	3.04	1	75% (146/194)	rep2	-	-
		#14.10	3.04	1	75% (146/194)	-	-	rep2

## Sheet: Supp_Table4
Supplemental Table 4. Description of the T-DNA mutant lines used and CRISPR mutant lines generated for this study.
mutant ID	Type of mutation	mutant details	Genotyping primers
mbd1-T	T-DNA	SALK_025352	WT: PJ466+PJ505; KO: PJ449+PJ505
mbd2-T	T-DNA	GABI_650A05	WT: PJ469+PJ508; KO: PJ455+PJ508
mbd6-T	T-DNA	SALK_043927	WT: PJ595+PJ596; KO: PJ449+PJ596
suvh1-T	T-DNA	SALK_003675	WT: PJ458+PJ497; KO: PJ449+PJ497
suvh3-T	T-DNA	SAIL_401_D01	WT: PJ456+PJ495; KO: PJ451+PJ495
mbd4-cr	Crispr KO	gRNA: GAAAGATGTTGCTCCTGGG; INDEL: T insertion; PROTEIN: G22W (D26*)	PJ723 + PJ722
mbd5-cr	Crispr KO	gRNA: CGGAAACGTGCGACGCCAG; INDEL: A insertion; PROTEIN: P28H (D31*)	PJ679 + PJ680
suvh1;3-cr	Crispr KO	gRNA: AAAACGATGAGAACCCAGG; INDEL: C insertion; PROTEIN: F49V (S56*)	PJ458 + PJ497
	Crispr KO	gRNA: TAATTTACAGTGGACAAGG; INDEL: A insertion / 13 bp deletion; PROTEIN: G278R (D289*) / G278T (E293*)	PJ676 + PJ456
mbd1;2-cr	Crispr KO	gRNA: GTGTGAGAAGTGCATGAAG; INDEL: G deletion; PROTEIN: K64S (L102*)	PJ677 + PJ466
	Crispr KO	gRNA: ACACAGTGTCCCTCTATCG; INDEL: A deletion; PROTEIN: I56S (L169*)	PJ612 + PJ678
mbd1;4-cr	Crispr KO	gRNA: AAAAGCCGGTACTCCAGGG; INDEL: A deletion; PROTEIN: R50G (I52*)	PJ677 + PJ466
	Crispr KO	gRNA: GAAAGATGTTGCTCCTGGG; INDEL: T insertion; PROTEIN: G22W (D26*)	PJ723 + PJ722
mbd5;6-cr	Crispr KO	gRNA: CGGAAACGTGCGACGCCAG; INDEL: A insertion; PROTEIN: P28H (D31*)	PJ679 + PJ680
	Crispr KO	gRNA: AACGACGACCGATTCAGGG; INDEL: A insertion; PROTEIN: G41R (N57*)	PJ681 + PJ596
mbd1;2;4	Crispr KO	mbd1;2-cr x mbd4-cr	see above
mbd2;5;6	Crispr KO	mbd1;2-cr x mbd5;6-cr	see above
mbd1;2;5;6	Crispr KO	mbd1;2-cr x mbd5;6-cr	see above

## Sheet: Supp_Table5
Supplemental Figure 5. List of proteins identified in each (T)AP-MS experiments.
The number of peptides identified in the experimental Set1 is listed on the left side of the "||" and kept empty if the experiment was not performed.
The number of peptides identified in each replicate of experimental Set2 are seperate by "|" on the right side of the "II".
The top 22 proteins (green cells) were identified in both experimental sets.
AGI	Symbol	Description	MBD1	MBD2	MBD4	MBD5	MBD6	SUVH1	SUVH3
AT4G22745	MBD1	methyl-CPG-binding domain 1 (MBD1)	109 || 14 | 13 | 14	NA	NA	|| 2 | 3 | 1	NA	NA	NA
AT5G35330	MBD2	methyl-CPG-binding domain protein 02 (MBD2)	NA	137 || 13 | 12 | 12	NA	NA	NA	NA	NA
AT3G63030	MBD4	methyl-CPG-binding domain 4 (MBD4)	NA	NA	|| 10 | 9 | 9	NA	NA	NA	NA
AT3G46580	MBD5	methyl-CPG-binding domain protein 5 (MBD5)	NA	NA	NA	|| 14 | 12 | 13	2 || 6 | 6 | 7	NA	NA
AT5G59380	MBD6	methyl-CPG-binding domain 6 (MBD6)	NA	NA	|| 1 | 1 | 1	|| 9 | 10 | 10	182 || 17 | 17 | 17	NA	NA
AT5G04940	SUVH1	SU(VAR)3-9 homolog 1 (SUVH1)	NA	NA	NA	|| 2 | 2 | 4	10 || 3 | 4 | 3	59 || 18 | 19 | 18	|| 5 | 7 | 8
AT1G73100	SUVH3	SU(VAR)3-9 homolog 3 (SUVH3)	NA	NA	NA	NA	NA	15 || 9 | 5 | 8	|| 30 | 31 | 33
AT1G21610	UBN1	wound-responsive family protein (UBN1)	76 || 3 | 5 | 3	NA	NA	NA	NA	NA	NA
AT1G54850	ACD21.4	α-crystallin domain protein; formally HSP20-like chaperones superfamily protein (IDL2)	NA	NA	NA	|| 7 | 7 | 7	101 || 7 | 7 | 7	NA	NA
AT3G19510	HAT3.1	Homeodomain-like protein with RING/FYVE/PHD-type zinc finger domain (HAT3.1)	92 || 9 | 8 | 9	NA	|| 6 | 7 | 6	NA	NA	NA	NA
AT5G23150	HUA2	Tudor/PWWP/MBT domain-containing protein (HUA2)	35 || 3 | 4 | 4	NA	|| 3 | 3 | 4	NA	NA	NA	NA
AT1G71260	WHIRLY2	WHIRLY 2	24 || 0 | 0 | 0	21 || 0 | 0 | 0	NA	NA	18 || 2 | 1 | 1	0 || 2 | 1 | 1	NA
AT5G49360	BXL1	beta-xylosidase 1	25 || 0 | 0 | 0	25 || 0 | 0 | 0	NA	NA	21 || 0 | 0 | 0	8 || 1 | 1 | 1	|| 1 | 1 | 2
AT2G01710	X5	Chaperone DnaJ-domain superfamily protein (X5)	NA	NA	NA	NA	8 || 0 | 0 | 0	23 || 0 | 0 | 0	NA
AT2G30620	H1.2	winged-helix D0-binding transcription factor family protein (H1.2)	21 || 0 | 0 | 0	14 || 2 | 2 | 1	NA	NA	12 || 0 | 0 | 0	1 || 0 | 0 | 0	NA
AT1G69010	BIM2	BES1-interacting Myc-like protein 2	11 || 1 | 1 | 1	9 || 1 | 1 | 1	|| 1 | 1 | 1	NA	11 || 0 | 0 | 0	10 || 0 | 0 | 0	NA
AT1G09340	CRB	chloroplast R0 binding	12 || 2 | 1 | 1	11 || 0 | 0 | 0	|| 1 | 1 | 2	NA	10 || 1 | 1 | 1	4 || 0 | 0 | 0	NA
AT5G23060	CAS	calcium sensing receptor	7 || 0 | 0 | 0	10 || 2 | 3 | 3	NA	|| 3 | 2 | 4	8 || 0 | 0 | 0	0 || 2 | 2 | 2	|| 3 | 3 | 2
AT3G46780	PTAC16	plastid transcriptionally active 16	3 || 1 | 1 | 2	3 || 2 | 2 | 3	|| 3 | 1 | 4	|| 3 | 3 | 3	0 || 2 | 3 | 1	6 || 1 | 2 | 2	|| 1 | 2 | 3
AT4G38970	FBA2	fructose-bisphosphate aldolase 2	NA	NA	NA	NA	NA	4 || 1 | 1 | 1	NA
AT3G12400	ELC	Ubiquitin-conjugating enzyme/RWD-like protein	NA	4 || 1 | 1 | 1	|| 1 | 2 | 1	|| 1 | 1 | 1	2 || 1 | 1 | 1	NA	NA
AT5G20730	ARF7	Transcriptional factor B3 family protein / auxin-responsive factor AUX/IAA-related	2 || 1 | 1 | 1	NA	NA	|| 1 | 1 | 1	NA	NA	NA
AT1G76440	ACD15.5	α-crystallin domain; formally HSP20-like chaperones superfamily protein (IDL3)	NA	NA	NA	NA	68 || 0 | 0 | 0	NA	NA
AT3G58570	RH52	P-loop containing nucleoside triphosphate hydrolases superfamily protein	52 || 0 | 0 | 0	NA	NA	NA	47 || 0 | 0 | 0	NA	NA
AT3G02090	MPPBETA	Insulinase (Peptidase family M16) protein	49 || 0 | 0 | 0	51 || 0 | 0 | 0	NA	NA	59 || 0 | 0 | 0	2 || 0 | 0 | 0	NA
AT3G07660	DUF1296	Kinase-related protein of unknown function (DUF1296)	51 || 0 | 0 | 0	38 || 0 | 0 | 0	NA	NA	35 || 0 | 0 | 0	36 || 0 | 0 | 0	NA
AT2G18960	AHA1	H(+)-ATPase 1	47 || 0 | 0 | 0	31 || 0 | 0 | 0	NA	NA	30 || 0 | 0 | 0	NA	NA
AT2G01190		Octicosapeptide/Phox/Bem1p family protein	47 || 0 | 0 | 0	39 || 0 | 0 | 0	NA	NA	34 || 0 | 0 | 0	23 || 0 | 0 | 0	NA
AT5G25060		R0 recognition motif (RRM)-containing protein	50 || 0 | 0 | 0	46 || 0 | 0 | 0	NA	NA	39 || 0 | 0 | 0	8 || 0 | 0 | 0	NA
AT1G10390		Nucleoporin autopeptidase	57 || 0 | 0 | 0	40 || 0 | 0 | 0	NA	NA	40 || 0 | 0 | 0	2 || 0 | 0 | 0	NA
AT5G37380		Chaperone DnaJ-domain superfamily protein	NA	NA	NA	NA	32 || 0 | 0 | 0	NA	NA
AT5G14170		SWIB/MDM2 domain superfamily protein	39 || 0 | 0 | 0	36 || 0 | 0 | 0	NA	NA	45 || 0 | 0 | 0	2 || 0 | 0 | 0	NA
AT1G13190		R0-binding (RRM/RBD/RNP motifs) family protein	31 || 0 | 0 | 0	28 || 0 | 0 | 0	NA	NA	28 || 0 | 0 | 0	NA	NA
AT2G47820			34 || 0 | 0 | 0	22 || 0 | 0 | 0	NA	NA	NA	NA	NA
AT3G05910		Pectinacetylesterase family protein	32 || 0 | 0 | 0	24 || 0 | 0 | 0	NA	NA	27 || 0 | 0 | 0	NA	NA
AT1G21700		SWITCH/sucrose nonfermenting 3C	29 || 0 | 0 | 0	22 || 0 | 0 | 0	NA	NA	31 || 0 | 0 | 0	NA	NA
AT3G12140		Emsy N Terminus (ENT)/ plant Tudor-like domains-containing protein	26 || 0 | 0 | 0	26 || 0 | 0 | 0	NA	NA	30 || 0 | 0 | 0	NA	NA
AT4G25550		Cleavage/polyadenylation specificity factor, 25kDa subunit	25 || 0 | 0 | 0	28 || 0 | 0 | 0	NA	NA	26 || 0 | 0 | 0	NA	NA
AT3G13060		evolutionarily conserved C-terminal region 5	36 || 0 | 0 | 0	29 || 0 | 0 | 0	NA	NA	21 || 0 | 0 | 0	17 || 0 | 0 | 0	NA
AT5G55670		R0-binding (RRM/RBD/RNP motifs) family protein	27 || 0 | 0 | 0	31 || 0 | 0 | 0	NA	NA	35 || 0 | 0 | 0	3 || 0 | 0 | 0	NA
AT3G22380		time for coffee	27 || 0 | 0 | 0	21 || 0 | 0 | 0	NA	NA	24 || 0 | 0 | 0	NA	NA
AT4G31200		SWAP (Suppressor-of-White-APricot)/surp R0-binding domain-containing protein	29 || 0 | 0 | 0	23 || 0 | 0 | 0	NA	NA	28 || 0 | 0 | 0	11 || 0 | 0 | 0	NA
AT3G44530		homolog of histone chaperone HIRA	22 || 0 | 0 | 0	NA	NA	NA	NA	NA	NA
AT3G53520		UDP-glucuronic acid decarboxylase 1	31 || 0 | 0 | 0	19 || 0 | 0 | 0	NA	NA	15 || 0 | 0 | 0	NA	NA
AT5G25460		Protein of unknown function, DUF642	23 || 0 | 0 | 0	22 || 0 | 0 | 0	NA	NA	20 || 0 | 0 | 0	NA	NA
AT2G47650		UDP-xylose synthase 4	27 || 0 | 0 | 0	16 || 0 | 0 | 0	NA	NA	NA	NA	NA
AT1G70710		glycosyl hydrolase 9B1	20 || 0 | 0 | 0	18 || 0 | 0 | 0	NA	NA	25 || 0 | 0 | 0	NA	NA
AT3G52500		Eukaryotic aspartyl protease family protein	18 || 0 | 0 | 0	23 || 0 | 0 | 0	NA	NA	21 || 0 | 0 | 0	NA	NA
AT3G55410		2-oxoglutarate dehydrogenase, E1 component	15 || 0 | 0 | 0	23 || 0 | 0 | 0	NA	NA	23 || 0 | 0 | 0	NA	NA
AT5G20280		sucrose phosphate synthase 1F	25 || 0 | 0 | 0	20 || 0 | 0 | 0	NA	NA	17 || 0 | 0 | 0	14 || 0 | 0 | 0	NA
AT2G38750		annexin 4	29 || 0 | 0 | 0	20 || 0 | 0 | 0	NA	NA	24 || 0 | 0 | 0	2 || 0 | 0 | 0	NA
AT3G62830		0D(P)-binding Rossmann-fold superfamily protein	26 || 0 | 0 | 0	17 || 0 | 0 | 0	NA	NA	12 || 0 | 0 | 0	NA	NA
AT4G37930		serine transhydroxymethyltransferase 1	19 || 0 | 0 | 0	21 || 0 | 0 | 0	NA	NA	15 || 0 | 0 | 0	NA	NA
AT5G35970		P-loop containing nucleoside triphosphate hydrolases superfamily protein	12 || 0 | 0 | 0	15 || 0 | 0 | 0	NA	NA	28 || 0 | 0 | 0	NA	NA
AT1G49780		plant U-box 26	16 || 0 | 0 | 0	18 || 0 | 0 | 0	NA	NA	20 || 0 | 0 | 0	NA	NA
AT3G48560		chlorsulfuron/imidazolinone resistant 1	25 || 0 | 0 | 0	17 || 0 | 0 | 0	NA	NA	12 || 0 | 0 | 0	NA	NA
AT1G02840		R0-binding (RRM/RBD/RNP motifs) family protein	18 || 0 | 0 | 0	NA	NA	NA	NA	NA	NA
AT1G20870		HSP20-like chaperones superfamily protein	NA	NA	NA	NA	18 || 0 | 0 | 0	NA	NA
AT4G20700		Protein of unknown function (DUF1204)	NA	18 || 0 | 0 | 0	NA	NA	NA	NA	NA
AT3G19820		cell elongation protein / DWARF1 / DIMINUTO (DIM)	21 || 0 | 0 | 0	18 || 0 | 0 | 0	NA	NA	14 || 0 | 0 | 0	NA	NA
AT3G03950		evolutionarily conserved C-terminal region 1	15 || 0 | 0 | 0	20 || 0 | 0 | 0	NA	NA	17 || 0 | 0 | 0	NA	NA
AT2G04842		threonyl-tR0 synthetase, putative / threonine--tR0 ligase, putative	16 || 0 | 0 | 0	16 || 0 | 0 | 0	NA	NA	19 || 0 | 0 | 0	NA	NA
AT5G62670		H(+)-ATPase 11	21 || 0 | 0 | 0	14 || 0 | 0 | 0	NA	NA	16 || 0 | 0 | 0	NA	NA
AT2G31810		ACT domain-containing small subunit of acetolactate synthase protein	22 || 0 | 0 | 0	14 || 0 | 0 | 0	NA	NA	13 || 0 | 0 | 0	NA	NA
AT2G33340		MOS4-associated complex 3B	15 || 0 | 0 | 0	18 || 0 | 0 | 0	NA	NA	15 || 0 | 0 | 0	NA	NA
AT1G49600		R0-binding protein 47A	18 || 0 | 0 | 0	17 || 0 | 0 | 0	NA	NA	10 || 0 | 0 | 0	18 || 0 | 0 | 0	NA
AT3G16857		response regulator 1	21 || 0 | 0 | 0	14 || 0 | 0 | 0	NA	NA	11 || 0 | 0 | 0	NA	NA
AT5G17510			13 || 0 | 0 | 0	13 || 0 | 0 | 0	NA	NA	20 || 0 | 0 | 0	NA	NA
AT5G25220		KNOTTED1-like homeobox gene 3	16 || 0 | 0 | 0	11 || 0 | 0 | 0	NA	NA	18 || 0 | 0 | 0	NA	NA
AT2G27980		Acyl-CoA N-acyltransferase with RING/FYVE/PHD-type zinc finger domain	15 || 0 | 0 | 0	NA	NA	NA	NA	NA	NA
AT3G13750		beta galactosidase 1	25 || 0 | 0 | 0	18 || 0 | 0 | 0	NA	NA	13 || 0 | 0 | 0	3 || 0 | 0 | 0	NA
AT1G05240		Peroxidase superfamily protein	18 || 0 | 0 | 0	15 || 0 | 0 | 0	NA	NA	11 || 0 | 0 | 0	NA	NA
AT3G18035		winged-helix D0-binding transcription factor family protein	17 || 0 | 0 | 0	12 || 0 | 0 | 0	NA	NA	15 || 0 | 0 | 0	NA	NA
AT3G01540		DEAD box R0 helicase 1	18 || 0 | 0 | 0	14 || 0 | 0 | 0	NA	NA	21 || 0 | 0 | 0	5 || 0 | 0 | 0	NA
AT3G50370			25 || 0 | 0 | 0	9 || 0 | 0 | 0	NA	NA	16 || 0 | 0 | 0	8 || 0 | 0 | 0	NA
AT5G11060		KNOTTED1-like homeobox gene 4	13 || 0 | 0 | 0	12 || 0 | 0 | 0	NA	NA	18 || 0 | 0 | 0	NA	NA
AT5G20200		nucleoporin-related	14 || 0 | 0 | 0	7 || 0 | 0 | 0	NA	NA	22 || 0 | 0 | 0	NA	NA
AT1G58100		TCP family transcription factor	14 || 0 | 0 | 0	14 || 0 | 0 | 0	NA	NA	14 || 0 | 0 | 0	NA	NA
AT3G03100		0DH:ubiquinone oxidoreductase, 17.2kDa subunit	13 || 0 | 0 | 0	15 || 0 | 0 | 0	NA	NA	13 || 0 | 0 | 0	NA	NA
AT5G57580		Calmodulin-binding protein	17 || 0 | 0 | 0	10 || 0 | 0 | 0	NA	NA	14 || 0 | 0 | 0	NA	NA
AT2G38040		acetyl Co-enzyme a carboxylase carboxyltransferase alpha subunit	16 || 0 | 0 | 0	6 || 0 | 0 | 0	NA	NA	17 || 0 | 0 | 0	NA	NA
AT1G62970		Chaperone DnaJ-domain superfamily protein	NA	NA	NA	NA	NA	13 || 0 | 0 | 0	NA
AT1G09770		cell division cycle 5	10 || 0 | 0 | 0	12 || 0 | 0 | 0	NA	NA	15 || 0 | 0 | 0	NA	NA
AT1G43850		SEUSS transcriptional co-regulator	16 || 0 | 0 | 0	7 || 0 | 0 | 0	NA	NA	14 || 0 | 0 | 0	NA	NA
AT2G41620		Nucleoporin interacting component (Nup93/Nic96-like) family protein	26 || 0 | 0 | 0	10 || 0 | 0 | 0	NA	NA	10 || 0 | 0 | 0	3 || 0 | 0 | 0	NA
AT1G45201		triacylglycerol lipase-like 1	22 || 0 | 0 | 0	7 || 0 | 0 | 0	NA	NA	7 || 0 | 0 | 0	NA	NA
AT5G47690		binding	9 || 0 | 0 | 0	15 || 0 | 0 | 0	NA	NA	NA	NA	NA
AT3G10650			12 || 0 | 0 | 0	11 || 0 | 0 | 0	NA	NA	12 || 0 | 0 | 0	NA	NA
AT5G11420		Protein of unknown function, DUF642	12 || 0 | 0 | 0	5 || 0 | 0 | 0	NA	NA	18 || 0 | 0 | 0	NA	NA
AT5G64330		Phototropic-responsive NPH3 family protein	19 || 0 | 0 | 0	5 || 0 | 0 | 0	NA	NA	11 || 0 | 0 | 0	NA	NA
AT3G07810		R0-binding (RRM/RBD/RNP motifs) family protein	14 || 0 | 0 | 0	12 || 0 | 0 | 0	NA	NA	8 || 0 | 0 | 0	12 || 0 | 0 | 0	NA
AT1G04510		MOS4-associated complex 3A	13 || 0 | 0 | 0	10 || 0 | 0 | 0	NA	NA	11 || 0 | 0 | 0	NA	NA
AT2G31370		Basic-leucine zipper (bZIP) transcription factor family protein	12 || 0 | 0 | 0	13 || 0 | 0 | 0	NA	NA	9 || 0 | 0 | 0	NA	NA
AT3G08510		phospholipase C 2	15 || 0 | 0 | 0	11 || 0 | 0 | 0	NA	NA	8 || 0 | 0 | 0	NA	NA
AT4G40030		Histone superfamily protein	14 || 0 | 0 | 0	11 || 0 | 0 | 0	NA	NA	9 || 0 | 0 | 0	NA	NA
AT5G15230		GAST1 protein homolog 4	12 || 0 | 0 | 0	11 || 0 | 0 | 0	NA	NA	11 || 0 | 0 | 0	NA	NA
AT2G42010		phospholipase D beta 1	16 || 0 | 0 | 0	14 || 0 | 0 | 0	NA	NA	11 || 0 | 0 | 0	4 || 0 | 0 | 0	NA
AT4G26650		R0-binding (RRM/RBD/RNP motifs) family protein	13 || 0 | 0 | 0	10 || 0 | 0 | 0	NA	NA	8 || 0 | 0 | 0	14 || 0 | 0 | 0	NA
AT1G76890		Duplicated homeodomain-like superfamily protein	13 || 0 | 0 | 0	7 || 0 | 0 | 0	NA	NA	13 || 0 | 0 | 0	NA	NA
AT5G17820		Peroxidase superfamily protein	8 || 0 | 0 | 0	13 || 0 | 0 | 0	NA	NA	12 || 0 | 0 | 0	NA	NA
AT2G44730		Alcohol dehydrogenase transcription factor Myb/SANT-like family protein	11 || 0 | 0 | 0	NA	NA	NA	NA	NA	NA
AT1G20630		catalase 1	NA	11 || 0 | 0 | 0	NA	NA	NA	NA	NA
AT1G30480		D111/G-patch domain-containing protein	10 || 0 | 0 | 0	13 || 0 | 0 | 0	NA	NA	9 || 0 | 0 | 0	NA	NA
AT3G07220		SMAD/FHA domain-containing protein	13 || 0 | 0 | 0	7 || 0 | 0 | 0	NA	NA	12 || 0 | 0 | 0	NA	NA
AT5G15270		R0-binding KH domain-containing protein	13 || 0 | 0 | 0	6 || 0 | 0 | 0	NA	NA	13 || 0 | 0 | 0	NA	NA
AT2G35940		BEL1-like homeodomain 1	16 || 0 | 0 | 0	10 || 0 | 0 | 0	|| 1 | 1 | 1	NA	13 || 0 | 0 | 0	NA	NA
AT2G44640			13 || 0 | 0 | 0	NA	NA	NA	8 || 0 | 0 | 0	NA	NA
AT1G01610		glycerol-3-phosphate acyltransferase 4	10 || 0 | 0 | 0	12 || 0 | 0 | 0	NA	NA	9 || 0 | 0 | 0	NA	NA
AT1G29370		Kinase-related protein of unknown function (DUF1296)	12 || 0 | 0 | 0	NA	NA	NA	8 || 0 | 0 | 0	11 || 0 | 0 | 0	NA
AT3G06480		DEAD box R0 helicase family protein	9 || 0 | 0 | 0	9 || 0 | 0 | 0	NA	NA	13 || 0 | 0 | 0	NA	NA
AT4G32040		KNOTTED1-like homeobox gene 5	10 || 0 | 0 | 0	8 || 0 | 0 | 0	NA	NA	13 || 0 | 0 | 0	NA	NA
AT5G66470		R0 binding; GTP binding	8 || 0 | 0 | 0	13 || 0 | 0 | 0	NA	NA	10 || 0 | 0 | 0	NA	NA
AT1G03860		prohibitin 2	17 || 0 | 0 | 0	5 || 0 | 0 | 0	NA	NA	8 || 0 | 0 | 0	NA	NA
AT4G28480		D0J heat shock family protein	11 || 0 | 0 | 0	11 || 0 | 0 | 0	NA	NA	8 || 0 | 0 | 0	NA	NA
AT1G06070		Basic-leucine zipper (bZIP) transcription factor family protein	13 || 0 | 0 | 0	7 || 0 | 0 | 0	NA	NA	NA	NA	NA
AT4G03250		Homeodomain-like superfamily protein	10 || 0 | 0 | 0	NA	NA	NA	NA	NA	NA
AT4G28510		prohibitin 1	10 || 0 | 0 | 0	NA	NA	NA	NA	NA	NA
AT3G44310		nitrilase 1	10 || 0 | 0 | 0	8 || 0 | 0 | 0	NA	NA	11 || 0 | 0 | 0	NA	NA
AT4G17330		G2484-1 protein	12 || 0 | 0 | 0	10 || 0 | 0 | 0	NA	NA	7 || 0 | 0 | 0	NA	NA
AT4G26010		Peroxidase superfamily protein	12 || 0 | 0 | 0	12 || 0 | 0 | 0	NA	NA	5 || 0 | 0 | 0	NA	NA
AT2G23350		poly(A) binding protein 4	7 || 0 | 0 | 0	9 || 0 | 0 | 0	NA	NA	8 || 0 | 0 | 0	14 || 0 | 0 | 0	NA
AT3G20820		Leucine-rich repeat (LRR) family protein	9 || 0 | 0 | 0	12 || 0 | 0 | 0	NA	NA	13 || 0 | 0 | 0	4 || 0 | 0 | 0	NA
AT5G43130		TBP-associated factor 4	8 || 0 | 0 | 0	NA	NA	NA	11 || 0 | 0 | 0	NA	NA
AT2G26280		CTC-interacting domain 7	8 || 0 | 0 | 0	10 || 0 | 0 | 0	NA	NA	10 || 0 | 0 | 0	NA	NA
AT4G21660		proline-rich spliceosome-associated (PSP) family protein	11 || 0 | 0 | 0	7 || 0 | 0 | 0	NA	NA	10 || 0 | 0 | 0	NA	NA
AT5G45950		GDSL-like Lipase/Acylhydrolase superfamily protein	10 || 0 | 0 | 0	11 || 0 | 0 | 0	NA	NA	7 || 0 | 0 | 0	NA	NA
AT1G60780		Clathrin adaptor complexes medium subunit family protein	8 || 0 | 0 | 0	12 || 0 | 0 | 0	NA	NA	7 || 0 | 0 | 0	NA	NA
AT5G53440			10 || 0 | 0 | 0	7 || 0 | 0 | 0	NA	NA	10 || 0 | 0 | 0	NA	NA
AT1G77310			9 || 0 | 0 | 0	NA	NA	NA	NA	NA	NA
AT5G64360		Chaperone DnaJ-domain superfamily protein	NA	NA	NA	NA	NA	9 || 0 | 0 | 0	NA
AT1G78820		D-mannose binding lectin protein with Apple-like carbohydrate-binding domain	0 || 3 | 3 | 2	0 || 3 | 2 | 3	|| 3 | 3 | 3	|| 3 | 3 | 3	0 || 4 | 4 | 3	0 || 2 | 3 | 3	NA
AT1G78830		Curculin-like (mannose-binding) lectin family protein	0 || 3 | 3 | 2	0 || 3 | 2 | 3	|| 3 | 3 | 3	|| 3 | 3 | 3	0 || 4 | 4 | 3	0 || 2 | 3 | 3	NA
AT1G72010		TCP family transcription factor	14 || 0 | 0 | 0	8 || 0 | 0 | 0	NA	NA	11 || 0 | 0 | 0	2 || 0 | 0 | 0	NA
AT2G38760		annexin 3	8 || 0 | 0 | 0	9 || 0 | 0 | 0	NA	NA	9 || 0 | 0 | 0	NA	NA
AT2G40620		Basic-leucine zipper (bZIP) transcription factor family protein	9 || 0 | 0 | 0	9 || 0 | 0 | 0	NA	NA	8 || 0 | 0 | 0	NA	NA
AT3G58120		Basic-leucine zipper (bZIP) transcription factor family protein	12 || 0 | 0 | 0	6 || 0 | 0 | 0	NA	NA	8 || 0 | 0 | 0	NA	NA
AT1G19700		BEL1-like homeodomain 10	7 || 0 | 0 | 0	NA	NA	NA	10 || 0 | 0 | 0	NA	NA
AT2G18510		R0-binding (RRM/RBD/RNP motifs) family protein	6 || 0 | 0 | 0	7 || 0 | 0 | 0	NA	NA	12 || 0 | 0 | 0	NA	NA
AT4G31430			5 || 0 | 0 | 0	11 || 0 | 0 | 0	NA	NA	9 || 0 | 0 | 0	NA	NA
AT1G03970		G-box binding factor 4	8 || 0 | 0 | 0	7 || 0 | 0 | 0	NA	NA	9 || 0 | 0 | 0	NA	NA
AT2G02070		indeterminate(ID)-domain 5	10 || 0 | 0 | 0	6 || 0 | 0 | 0	NA	NA	8 || 0 | 0 | 0	NA	NA
AT3G19130		R0-binding protein 47B	10 || 0 | 0 | 0	9 || 0 | 0 | 0	NA	NA	NA	5 || 0 | 0 | 0	NA
AT1G20760		Calcium-binding EF hand family protein	8 || 0 | 0 | 0	NA	NA	NA	8 || 0 | 0 | 0	NA	NA
AT1G20960		U5 small nuclear ribonucleoprotein helicase, putative	6 || 0 | 0 | 0	10 || 0 | 0 | 0	NA	NA	NA	NA	NA
AT2G25110		stromal cell-derived factor 2-like protein precursor	9 || 0 | 0 | 0	7 || 0 | 0 | 0	NA	NA	NA	NA	NA
AT3G23900		R0 recognition motif (RRM)-containing protein	9 || 0 | 0 | 0	7 || 0 | 0 | 0	NA	NA	NA	NA	NA
AT5G04990		SAD1/UNC-84 domain protein 1	9 || 0 | 0 | 0	NA	NA	NA	7 || 0 | 0 | 0	NA	NA
AT5G63110		histone deacetylase 6	11 || 0 | 0 | 0	5 || 0 | 0 | 0	NA	NA	NA	NA	NA
AT5G65110		acyl-CoA oxidase 2	9 || 0 | 0 | 0	7 || 0 | 0 | 0	NA	NA	NA	NA	NA
AT2G46020		transcription regulatory protein SNF2, putative	NA	10 || 0 | 0 | 0	NA	NA	6 || 0 | 0 | 0	NA	NA
AT4G29220		phosphofructokinase 1	8 || 0 | 0 | 0	NA	NA	NA	NA	NA	NA
AT4G36250		aldehyde dehydrogenase 3F1	8 || 0 | 0 | 0	NA	NA	NA	NA	NA	NA
AT1G15200		protein-protein interaction regulator family protein	NA	NA	NA	NA	8 || 0 | 0 | 0	NA	NA
AT1G20110		RING/FYVE/PHD zinc finger superfamily protein	NA	NA	NA	NA	NA	8 || 0 | 0 | 0	NA
AT5G06780		Emsy N Terminus (ENT)/ plant Tudor-like domains-containing protein	NA	NA	NA	NA	8 || 0 | 0 | 0	NA	NA
AT3G57150		homologue of 0P57	10 || 0 | 0 | 0	7 || 0 | 0 | 0	NA	NA	6 || 0 | 0 | 0	NA	NA
AT4G01290			6 || 0 | 0 | 0	8 || 0 | 0 | 0	NA	NA	9 || 0 | 0 | 0	NA	NA
AT5G47430		DWNN domain, a CCHC-type zinc finger	11 || 0 | 0 | 0	5 || 0 | 0 | 0	NA	NA	7 || 0 | 0 | 0	NA	NA
AT1G09200		Histone superfamily protein	NA	9 || 0 | 0 | 0	NA	NA	6 || 0 | 0 | 0	NA	NA
AT4G38900		Basic-leucine zipper (bZIP) transcription factor family protein	NA	8 || 0 | 0 | 0	NA	NA	7 || 0 | 0 | 0	NA	NA
AT2G18980		Peroxidase superfamily protein	7 || 0 | 0 | 0	9 || 0 | 0 | 0	NA	NA	6 || 0 | 0 | 0	NA	NA
AT3G08030		Protein of unknown function, DUF642	7 || 0 | 0 | 0	10 || 0 | 0 | 0	NA	NA	NA	5 || 0 | 0 | 0	NA
AT3G13810		indeterminate(ID)-domain 11	7 || 0 | 0 | 0	6 || 0 | 0 | 0	NA	NA	9 || 0 | 0 | 0	NA	NA
AT4G34830		Pentatricopeptide repeat (PPR) superfamily protein	5 || 0 | 0 | 0	11 || 0 | 0 | 0	NA	NA	6 || 0 | 0 | 0	NA	NA
AT4G11820		hydroxymethylglutaryl-CoA synthase / HMG-CoA synthase / 3-hydroxy-3-methylglutaryl coenzyme A synthase	7 || 0 | 0 | 0	10 || 0 | 0 | 0	NA	NA	10 || 0 | 0 | 0	1 || 0 | 0 | 0	NA
AT1G12770		P-loop containing nucleoside triphosphate hydrolases superfamily protein	8 || 0 | 0 | 0	6 || 0 | 0 | 0	NA	NA	7 || 0 | 0 | 0	NA	NA
AT2G34470		urease accessory protein G	9 || 0 | 0 | 0	5 || 0 | 0 | 0	NA	NA	NA	NA	NA
AT4G34660		SH3 domain-containing protein	7 || 0 | 0 | 0	NA	NA	NA	7 || 0 | 0 | 0	NA	NA
AT2G44530		Phosphoribosyltransferase family protein	NA	7 || 0 | 0 | 0	NA	NA	7 || 0 | 0 | 0	NA	NA
AT3G20250		pumilio 5	NA	NA	NA	NA	7 || 0 | 0 | 0	7 || 0 | 0 | 0	NA
AT4G34980		subtilisin-like serine protease 2	7 || 0 | 0 | 0	NA	NA	NA	NA	NA	NA
AT4G38130		histone deacetylase 1	7 || 0 | 0 | 0	NA	NA	NA	NA	NA	NA
AT5G01390		D0J heat shock family protein	7 || 0 | 0 | 0	NA	NA	NA	NA	NA	NA
AT5G26710		Glutamyl/glutaminyl-tR0 synthetase, class Ic	7 || 0 | 0 | 0	NA	NA	NA	NA	NA	NA
AT5G53330		Ubiquitin-associated/translation elongation factor EF1B protein	7 || 0 | 0 | 0	NA	NA	NA	NA	NA	NA
AT1G68560		alpha-xylosidase 1	NA	NA	NA	NA	7 || 0 | 0 | 0	NA	NA
AT3G14100		R0-binding (RRM/RBD/RNP motifs) family protein	NA	NA	NA	NA	NA	7 || 0 | 0 | 0	NA
AT3G22430			NA	NA	NA	NA	7 || 0 | 0 | 0	NA	NA
AT3G44320		nitrilase 3	NA	7 || 0 | 0 | 0	NA	NA	NA	NA	NA
AT2G45620		Nucleotidyltransferase family protein	8 || 0 | 0 | 0	7 || 0 | 0 | 0	NA	NA	7 || 0 | 0 | 0	5 || 0 | 0 | 0	NA
AT2G15270			7 || 0 | 0 | 0	6 || 0 | 0 | 0	NA	NA	7 || 0 | 0 | 0	NA	NA
AT5G08330		TCP family transcription factor	6 || 0 | 0 | 0	7 || 0 | 0 | 0	NA	NA	7 || 0 | 0 | 0	NA	NA
AT5G58040		homolog of yeast FIP1 [V]	6 || 0 | 0 | 0	7 || 0 | 0 | 0	NA	NA	7 || 0 | 0 | 0	NA	NA
AT1G33240		GT-2-like 1	7 || 0 | 0 | 0	NA	NA	NA	6 || 0 | 0 | 0	NA	NA
AT2G42270		U5 small nuclear ribonucleoprotein helicase	7 || 0 | 0 | 0	6 || 0 | 0 | 0	NA	NA	NA	NA	NA
AT3G61240		DEA(D/H)-box R0 helicase family protein	6 || 0 | 0 | 0	7 || 0 | 0 | 0	NA	NA	NA	NA	NA
AT3G62600		D0J heat shock family protein	8 || 0 | 0 | 0	NA	NA	NA	5 || 0 | 0 | 0	NA	NA
AT1G15820		light harvesting complex photosystem II subunit 6	5 || 0 | 0 | 0	7 || 0 | 0 | 0	NA	NA	8 || 0 | 0 | 0	4 || 0 | 0 | 0	NA
AT1G30460		cleavage and polyadenylation specificity factor 30	8 || 0 | 0 | 0	5 || 0 | 0 | 0	NA	NA	5 || 0 | 0 | 0	NA	NA
AT1G79090			6 || 0 | 0 | 0	NA	NA	NA	7 || 0 | 0 | 0	5 || 0 | 0 | 0	NA
AT3G27300		glucose-6-phosphate dehydrogenase 5	5 || 0 | 0 | 0	7 || 0 | 0 | 0	NA	NA	NA	NA	NA
AT3G52220			NA	6 || 0 | 0 | 0	NA	NA	6 || 0 | 0 | 0	NA	NA
AT1G73940			6 || 0 | 0 | 0	NA	NA	NA	NA	NA	NA
AT1G75410		BEL1-like homeodomain 3	6 || 0 | 0 | 0	NA	NA	NA	NA	NA	NA
AT2G04520		Nucleic acid-binding, OB-fold-like protein	6 || 0 | 0 | 0	NA	NA	NA	NA	NA	NA
AT2G18750		Calmodulin-binding protein	6 || 0 | 0 | 0	NA	NA	NA	NA	NA	NA
AT3G02650		Tetratricopeptide repeat (TPR)-like superfamily protein	0 || 2 | 2 | 2	NA	NA	NA	NA	NA	NA
AT4G00400		glycerol-3-phosphate acyltransferase 8	6 || 0 | 0 | 0	NA	NA	NA	NA	NA	NA
AT5G40770		prohibitin 3	6 || 0 | 0 | 0	NA	NA	NA	NA	NA	NA
AT5G53620			6 || 0 | 0 | 0	NA	NA	NA	NA	NA	NA
AT5G57460			6 || 0 | 0 | 0	NA	NA	NA	NA	NA	NA
AT1G32500		non-intrinsic ABC protein 6	NA	NA	NA	NA	NA	6 || 0 | 0 | 0	NA
AT1G53500		0D-dependent epimerase/dehydratase family protein	NA	6 || 0 | 0 | 0	NA	NA	NA	NA	NA
AT1G54080		oligouridylate-binding protein 1A	NA	NA	NA	NA	NA	6 || 0 | 0 | 0	NA
AT3G04590		AT hook motif D0-binding family protein	NA	NA	NA	NA	6 || 0 | 0 | 0	NA	NA
AT3G28460		methyltransferases	NA	6 || 0 | 0 | 0	NA	NA	NA	NA	NA
AT5G50780		Histidine kinase-, D0 gyrase B-, and HSP90-like ATPase family protein	NA	6 || 0 | 0 | 0	NA	NA	NA	NA	NA
AT4G30790			0 || 2 | 2 | 2	0 || 2 | 2 | 2	NA	|| 2 | 2 | 2	0 || 2 | 2 | 2	0 || 2 | 2 | 1	NA
AT1G77680		Ribonuclease II/R family protein	0 || 2 | 1 | 2	0 || 2 | 2 | 2	|| 2 | 2 | 2	|| 2 | 2 | 2	0 || 2 | 2 | 2	0 || 2 | 2 | 2	|| 2 | 2 | 1
AT1G04600		myosin XI A	0 || 2 | 2 | 2	0 || 2 | 2 | 2	|| 2 | 2 | 1	NA	0 || 2 | 2 | 2	NA	|| 2 | 1 | 2
AT2G33240		myosin XI D	0 || 2 | 2 | 2	0 || 2 | 2 | 2	|| 2 | 2 | 1	NA	0 || 2 | 2 | 2	NA	|| 2 | 1 | 2
AT3G10710		root hair specific 12	0 || 2 | 2 | 2	0 || 2 | 2 | 2	NA	|| 2 | 2 | 2	NA	0 || 2 | 1 | 2	|| 2 | 2 | 1
AT5G04960		Plant invertase/pectin methylesterase inhibitor superfamily	0 || 2 | 2 | 2	0 || 2 | 2 | 2	NA	|| 2 | 2 | 2	NA	0 || 2 | 1 | 2	|| 2 | 2 | 1
AT4G03110		R0-binding protein-defense related 1	6 || 0 | 0 | 0	5 || 0 | 0 | 0	NA	NA	7 || 0 | 0 | 0	4 || 0 | 0 | 0	NA
AT3G02350		galacturonosyltransferase 9	6 || 0 | 0 | 0	5 || 0 | 0 | 0	NA	NA	NA	NA	NA
AT3G13460		evolutionarily conserved C-terminal region 2	6 || 0 | 0 | 0	5 || 0 | 0 | 0	NA	NA	NA	NA	NA
AT3G17880		tetraticopeptide domain-containing thioredoxin	6 || 0 | 0 | 0	5 || 0 | 0 | 0	NA	NA	NA	NA	NA
AT4G33510		3-deoxy-d-arabino-heptulosonate 7-phosphate synthase	6 || 0 | 0 | 0	5 || 0 | 0 | 0	NA	NA	NA	NA	NA
AT5G07980		dentin sialophosphoprotein-related	6 || 0 | 0 | 0	NA	NA	NA	5 || 0 | 0 | 0	NA	NA
AT4G32820		Tetratricopeptide repeat (TPR)-like superfamily protein	NA	NA	NA	NA	NA	0 || 2 | 1 | 2	|| 2 | 2 | 2
AT4G36730		G-box binding factor 1	NA	5 || 0 | 0 | 0	NA	NA	6 || 0 | 0 | 0	NA	NA
AT5G06800		myb-like HTH transcriptional regulator family protein	NA	NA	|| 1 | 2 | 1	|| 2 | 3 | 2	NA	NA	NA
AT4G04640		ATPase, F1 complex, gamma subunit protein	6 || 0 | 0 | 0	8 || 0 | 0 | 0	NA	NA	4 || 0 | 0 | 0	3 || 0 | 0 | 0	NA
AT5G67500		voltage dependent anion channel 2	10 || 0 | 0 | 0	6 || 0 | 0 | 0	NA	NA	4 || 0 | 0 | 0	1 || 0 | 0 | 0	NA
AT5G55300		D0 topoisomerase I alpha	NA	0 || 2 | 2 | 2	|| 2 | 2 | 1	NA	NA	NA	|| 2 | 1 | 1
AT3G06410		Zinc finger C-x8-C-x5-C-x3-H type family protein	5 || 0 | 0 | 0	5 || 0 | 0 | 0	NA	NA	NA	NA	NA
AT3G21210		zinc ion binding	5 || 0 | 0 | 0	5 || 0 | 0 | 0	NA	NA	NA	NA	NA
AT3G47470		light-harvesting chlorophyll-protein complex I subunit A4	5 || 0 | 0 | 0	5 || 0 | 0 | 0	NA	NA	NA	NA	NA
AT5G64100		Peroxidase superfamily protein	5 || 0 | 0 | 0	NA	NA	NA	5 || 0 | 0 | 0	NA	NA
AT3G11964		R0 binding	NA	NA	|| 2 | 2 | 1	NA	0 || 2 | 2 | 1	NA	NA
AT5G59710		VIRE2 interacting protein 2	NA	5 || 0 | 0 | 0	NA	NA	5 || 0 | 0 | 0	NA	NA
AT2G28760		UDP-XYL synthase 6	5 || 0 | 0 | 0	NA	NA	NA	NA	NA	NA
AT3G18070		beta glucosidase 43	5 || 0 | 0 | 0	NA	NA	NA	NA	NA	NA
AT3G18500		D0se I-like superfamily protein	5 || 0 | 0 | 0	NA	NA	NA	NA	NA	NA
AT3G19120		PIF / Ping-Pong family of plant transposases	5 || 0 | 0 | 0	NA	NA	NA	NA	NA	NA
AT4G02510		translocon at the outer envelope membrane of chloroplasts 159	5 || 0 | 0 | 0	NA	NA	NA	NA	NA	NA
AT4G26630		DEK domain-containing chromatin associated protein	5 || 0 | 0 | 0	NA	NA	NA	NA	NA	NA
AT4G31880			5 || 0 | 0 | 0	NA	NA	NA	NA	NA	NA
AT5G07970		dentin sialophosphoprotein-related	5 || 0 | 0 | 0	NA	NA	NA	NA	NA	NA
AT5G45200		Disease resistance protein (TIR-NBS-LRR class) family	5 || 0 | 0 | 0	NA	NA	NA	NA	NA	NA
AT5G55040		D0-binding bromodomain-containing protein	5 || 0 | 0 | 0	NA	NA	NA	NA	NA	NA
AT5G58190		evolutionarily conserved C-terminal region 10	5 || 0 | 0 | 0	NA	NA	NA	NA	NA	NA
AT1G06760		winged-helix D0-binding transcription factor family protein	NA	0 || 2 | 2 | 1	NA	NA	NA	NA	NA
AT1G17440		Transcription initiation factor TFIID subunit A	NA	NA	NA	NA	5 || 0 | 0 | 0	NA	NA
AT1G27650		U2 snRNP auxiliary factor small subunit, putative	NA	NA	NA	NA	5 || 0 | 0 | 0	NA	NA
AT1G59900		pyruvate dehydrogenase complex E1 alpha subunit	NA	5 || 0 | 0 | 0	NA	NA	NA	NA	NA
AT2G20530		prohibitin 6	NA	NA	NA	NA	5 || 0 | 0 | 0	NA	NA
AT2G21380		Kinesin motor family protein	NA	NA	NA	|| 2 | 2 | 1	NA	NA	NA
AT2G23760		BEL1-like homeodomain 4	NA	NA	NA	NA	5 || 0 | 0 | 0	NA	NA
AT2G30950		FtsH extracellular protease family	NA	NA	NA	NA	NA	5 || 0 | 0 | 0	NA
AT2G39670		Radical SAM superfamily protein	NA	5 || 0 | 0 | 0	NA	NA	NA	NA	NA
AT3G01500		carbonic anhydrase 1	NA	NA	NA	NA	NA	5 || 0 | 0 | 0	NA
AT3G10730		SAD1/UNC-84 domain protein 2	NA	NA	NA	NA	5 || 0 | 0 | 0	NA	NA
AT3G10920		manganese superoxide dismutase 1	NA	NA	NA	NA	NA	5 || 0 | 0 | 0	NA
AT3G47450		P-loop containing nucleoside triphosphate hydrolases superfamily protein	NA	NA	NA	NA	0 || 2 | 2 | 1	NA	NA
AT3G47620		TEOSINTE BRANCHED, cycloidea and PCF (TCP) 14	NA	NA	NA	NA	5 || 0 | 0 | 0	NA	NA
AT3G51880		high mobility group B1	NA	NA	NA	NA	5 || 0 | 0 | 0	NA	NA
AT3G61820		Eukaryotic aspartyl protease family protein	NA	5 || 0 | 0 | 0	NA	NA	NA	NA	NA
AT4G28370		RING/U-box superfamily protein	NA	NA	NA	NA	5 || 0 | 0 | 0	NA	NA
AT5G02530		R0-binding (RRM/RBD/RNP motifs) family protein	NA	NA	NA	NA	5 || 0 | 0 | 0	NA	NA
AT5G09540		Chaperone DnaJ-domain superfamily protein	NA	NA	NA	NA	NA	5 || 0 | 0 | 0	NA
AT5G11530		embryonic flower 1 (EMF1)	NA	NA	|| 2 | 2 | 1	NA	NA	NA	NA
AT5G15530		biotin carboxyl carrier protein 2	NA	NA	NA	NA	5 || 0 | 0 | 0	NA	NA
AT5G18570		GTP1/OBG family protein	NA	5 || 0 | 0 | 0	NA	NA	NA	NA	NA
AT5G20635			NA	NA	NA	NA	5 || 0 | 0 | 0	NA	NA
AT5G39570			NA	NA	NA	NA	NA	5 || 0 | 0 | 0	NA
AT5G51270		U-box domain-containing protein kinase family protein	NA	NA	NA	NA	5 || 0 | 0 | 0	NA	NA
AT5G55210			NA	5 || 0 | 0 | 0	NA	NA	NA	NA	NA
AT5G58140		phototropin 2	NA	NA	NA	NA	5 || 0 | 0 | 0	NA	NA
AT5G51600		Microtubule associated protein (MAP65/ASE1) family protein	0 || 1 | 2 | 2	0 || 2 | 1 | 2	NA	|| 2 | 1 | 1	NA	NA	NA
AT4G01020		helicase domain-containing protein / IBR domain-containing protein / zinc finger protein-related	0 || 2 | 2 | 2	0 || 2 | 1 | 2	|| 2 | 1 | 1	|| 1 | 2 | 2	NA	NA	|| 1 | 1 | 1
AT5G10370		helicase domain-containing protein / IBR domain-containing protein / zinc finger protein-related	0 || 2 | 2 | 2	0 || 2 | 1 | 2	|| 2 | 1 | 1	|| 1 | 2 | 2	NA	NA	|| 1 | 1 | 1
AT1G11860		Glycine cleavage T-protein family	NA	NA	NA	NA	2 || 0 | 0 | 0	7 || 0 | 0 | 0	NA
AT5G66420			NA	6 || 0 | 0 | 0	NA	NA	6 || 0 | 0 | 0	1 || 0 | 0 | 0	NA
AT1G47830		S0RE-like superfamily protein	NA	NA	|| 2 | 1 | 1	|| 1 | 2 | 1	NA	NA	NA
AT5G47820		P-loop containing nucleoside triphosphate hydrolases superfamily protein	NA	NA	NA	|| 1 | 2 | 1	NA	NA	|| 2 | 1 | 1
AT2G10940		Bifunctional inhibitor/lipid-transfer protein/seed storage 2S albumin superfamily protein	NA	NA	NA	NA	4 || 0 | 0 | 0	NA	NA
AT2G31970		D0 repair-recombination protein (RAD50)	NA	NA	NA	|| 1 | 2 | 1	NA	NA	NA
AT4G19865		Galactose oxidase/kelch repeat superfamily protein	NA	NA	NA	|| 2 | 1 | 1	NA	NA	NA
AT4G31805		WRKY family transcription factor	NA	NA	NA	NA	NA	NA	|| 1 | 1 | 2
AT5G14740		carbonic anhydrase 2	NA	NA	NA	NA	NA	4 || 0 | 0 | 0	NA
AT5G66570		PS II oxygen-evolving complex 1	NA	NA	NA	NA	NA	4 || 0 | 0 | 0	NA
AT3G04750		Tetratricopeptide repeat (TPR)-like superfamily protein	NA	NA	|| 1 | 1 | 1	|| 1 | 1 | 2	NA	NA	|| 1 | 1 | 2
AT1G68270		AMP-dependent synthetase and ligase family protein	NA	NA	NA	|| 1 | 2 | 1	NA	NA	|| 1 | 1 | 1
AT3G14110		Tetratricopeptide repeat (TPR)-like superfamily protein	NA	NA	NA	|| 1 | 1 | 2	NA	NA	|| 1 | 1 | 1
AT4G30640		RNI-like superfamily protein	NA	NA	|| 1 | 1 | 2	|| 1 | 1 | 1	NA	NA	NA
AT1G51490		beta glucosidase 36	NA	NA	|| 2 | 1 | 1	|| 1 | 1 | 1	NA	NA	|| 1 | 1 | 1
AT1G02740		MRG family protein	NA	NA	|| 1 | 1 | 1	|| 1 | 1 | 1	NA	NA	|| 1 | 1 | 1
AT1G03380		homolog of yeast autophagy 18 (ATG18) G	NA	NA	|| 1 | 1 | 1	|| 1 | 1 | 1	NA	NA	|| 1 | 1 | 1
AT1G14280		phytochrome kinase substrate 2	NA	NA	|| 1 | 1 | 1	|| 1 | 1 | 1	NA	NA	|| 1 | 1 | 1
AT1G15360		Integrase-type D0-binding superfamily protein	NA	NA	|| 1 | 1 | 1	|| 1 | 1 | 1	NA	NA	|| 1 | 1 | 1
AT1G28310		Dof-type zinc finger D0-binding family protein	NA	NA	|| 1 | 1 | 1	|| 1 | 1 | 1	NA	NA	|| 1 | 1 | 1
AT1G32230		WWE protein-protein interaction domain protein family	NA	NA	|| 1 | 1 | 1	|| 1 | 1 | 1	NA	NA	|| 1 | 1 | 1
AT1G54250		R0 polymerase Rpb8	NA	NA	|| 1 | 1 | 1	|| 1 | 1 | 1	NA	NA	|| 1 | 1 | 1
AT1G68530		3-ketoacyl-CoA synthase 6	NA	NA	|| 1 | 1 | 1	|| 1 | 1 | 1	NA	NA	|| 1 | 1 | 1
AT1G72360		Integrase-type D0-binding superfamily protein	NA	NA	|| 1 | 1 | 1	|| 1 | 1 | 1	NA	NA	|| 1 | 1 | 1
AT1G75750		GAST1 protein homolog 1	NA	NA	|| 1 | 1 | 1	|| 1 | 1 | 1	NA	NA	|| 1 | 1 | 1
AT1G79600		Protein kinase superfamily protein	NA	NA	|| 1 | 1 | 1	|| 1 | 1 | 1	NA	NA	|| 1 | 1 | 1
AT1G80090		Cystathionine beta-synthase (CBS) family protein	NA	NA	|| 1 | 1 | 1	|| 1 | 1 | 1	NA	NA	|| 1 | 1 | 1
AT2G28520		vacuolar proton ATPase A1	NA	NA	|| 1 | 1 | 1	|| 1 | 1 | 1	NA	NA	|| 1 | 1 | 1
AT2G31910		cation/H+ exchanger 21	NA	NA	|| 1 | 1 | 1	|| 1 | 1 | 1	NA	NA	|| 1 | 1 | 1
AT2G46770		0C (No Apical Meristem) domain transcriptional regulator superfamily protein	NA	NA	|| 1 | 1 | 1	|| 1 | 1 | 1	NA	NA	|| 1 | 1 | 1
AT3G02850		STELAR K+ outward rectifier	NA	NA	|| 1 | 1 | 1	|| 1 | 1 | 1	NA	NA	|| 1 | 1 | 1
AT3G10440		Shugoshin C terminus	NA	NA	|| 1 | 1 | 1	|| 1 | 1 | 1	NA	NA	|| 1 | 1 | 1
AT3G10490		0C domain containing protein 52	NA	NA	|| 1 | 1 | 1	|| 1 | 1 | 1	NA	NA	|| 1 | 1 | 1
AT3G17180		serine carboxypeptidase-like 33	NA	NA	|| 1 | 1 | 1	|| 1 | 1 | 1	NA	NA	|| 1 | 1 | 1
AT3G18600		P-loop containing nucleoside triphosphate hydrolases superfamily protein	NA	NA	|| 1 | 1 | 1	|| 1 | 1 | 1	NA	NA	|| 1 | 1 | 1
AT3G22880		D0 repair (Rad51) family protein	NA	NA	|| 1 | 1 | 1	|| 1 | 1 | 1	NA	NA	|| 1 | 1 | 1
AT3G49250		defective in meristem silencing 3	NA	NA	|| 1 | 1 | 1	|| 1 | 1 | 1	NA	NA	|| 1 | 1 | 1
AT4G18130		phytochrome E	NA	NA	|| 1 | 1 | 1	|| 1 | 1 | 1	NA	NA	|| 1 | 1 | 1
AT5G02990		Galactose oxidase/kelch repeat superfamily protein	NA	NA	|| 1 | 1 | 1	|| 1 | 1 | 1	NA	NA	|| 1 | 1 | 1
AT5G47070		Protein kinase superfamily protein	NA	NA	|| 1 | 1 | 1	|| 1 | 1 | 1	NA	NA	|| 1 | 1 | 1
AT5G62370		Tetratricopeptide repeat (TPR)-like superfamily protein	NA	NA	|| 1 | 1 | 1	|| 1 | 1 | 1	NA	NA	|| 1 | 1 | 1
AT1G12870		F-box and associated interaction domains-containing protein	NA	NA	|| 1 | 1 | 1	NA	NA	NA	|| 1 | 1 | 1
AT1G18370		ATP binding microtubule motor family protein	NA	NA	|| 1 | 1 | 1	NA	NA	NA	|| 1 | 1 | 1
AT1G30330		auxin response factor 6	NA	NA	|| 1 | 1 | 1	|| 1 | 1 | 1	NA	NA	NA
AT1G33390		R0 helicase family protein	NA	NA	|| 1 | 1 | 1	NA	NA	NA	|| 1 | 1 | 1
AT1G34130		staurosporin and temperature sensitive 3-like b	NA	NA	|| 1 | 1 | 1	NA	NA	NA	|| 1 | 1 | 1
AT1G44120		Armadillo/beta-catenin-like repeat; C2 calcium/lipid-binding domain (CaLB) protein	NA	NA	|| 1 | 1 | 1	|| 1 | 1 | 1	NA	NA	NA
AT1G49210		RING/U-box superfamily protein	NA	NA	|| 1 | 1 | 1	|| 1 | 1 | 1	NA	NA	NA
AT1G54040		epithiospecifier protein	NA	NA	|| 1 | 1 | 1	|| 1 | 1 | 1	NA	NA	NA
AT1G57800		zinc finger (C3HC4-type RING finger) family protein	NA	NA	|| 1 | 1 | 1	|| 1 | 1 | 1	NA	NA	NA
AT1G62390		Octicosapeptide/Phox/Bem1p (PB1) domain-containing protein / tetratricopeptide repeat (TPR)-containing protein	NA	NA	|| 1 | 1 | 1	NA	NA	NA	|| 1 | 1 | 1
AT1G68610		PLANT CADMIUM RESISTANCE 11	NA	NA	|| 1 | 1 | 1	|| 1 | 1 | 1	NA	NA	NA
AT1G71420		Tetratricopeptide repeat (TPR)-like superfamily protein	NA	NA	|| 1 | 1 | 1	NA	NA	NA	|| 1 | 1 | 1
AT1G80000		CASC3/Barentsz eIF4AIII binding	NA	NA	NA	|| 1 | 1 | 1	NA	NA	|| 1 | 1 | 1
AT2G24130		Leucine-rich receptor-like protein kinase family protein	NA	NA	|| 1 | 1 | 1	|| 1 | 1 | 1	NA	NA	NA
AT2G25850		poly(A) polymerase 2	NA	NA	|| 1 | 1 | 1	|| 1 | 1 | 1	NA	NA	NA
AT2G35930		plant U-box 23	NA	NA	|| 1 | 1 | 1	|| 1 | 1 | 1	NA	NA	NA
AT2G42005		Transmembrane amino acid transporter family protein	NA	NA	NA	|| 1 | 1 | 1	NA	NA	|| 1 | 1 | 1
AT3G01610		cell division cycle 48C	NA	NA	NA	|| 1 | 1 | 1	NA	NA	|| 1 | 1 | 1
AT3G02780		isopentenyl pyrophosphate:dimethylallyl pyrophosphate isomerase 2	NA	NA	|| 1 | 1 | 1	|| 1 | 1 | 1	NA	NA	NA
AT3G07930		D0 glycosylase superfamily protein	NA	NA	|| 1 | 1 | 1	|| 1 | 1 | 1	NA	NA	NA
AT3G23030		indole-3-acetic acid inducible 2	NA	NA	NA	|| 1 | 1 | 1	NA	NA	|| 1 | 1 | 1
AT3G44730		kinesin-like protein 1	NA	NA	|| 1 | 1 | 1	|| 1 | 1 | 1	NA	NA	NA
AT3G45150		TCP domain protein 16	NA	NA	NA	|| 1 | 1 | 1	NA	NA	|| 1 | 1 | 1
AT3G58180		ARM repeat superfamily protein	NA	NA	|| 1 | 1 | 1	NA	NA	NA	|| 1 | 1 | 1
AT3G58400		TRAF-like family protein	NA	NA	|| 1 | 1 | 1	|| 1 | 1 | 1	NA	NA	NA
AT4G02460		D0 mismatch repair protein, putative	NA	NA	|| 1 | 1 | 1	NA	NA	NA	|| 1 | 1 | 1
AT4G04340		ERD (early-responsive to dehydration stress) family protein	NA	NA	|| 1 | 1 | 1	|| 1 | 1 | 1	NA	NA	NA
AT4G08480		mitogen-activated protein kinase kinase kinase 9	NA	NA	NA	|| 1 | 1 | 1	NA	NA	|| 1 | 1 | 1
AT4G14770		TESMIN/TSO1-like CXC 2	NA	NA	|| 1 | 1 | 1	|| 1 | 1 | 1	NA	NA	NA
AT4G16310		LSD1-like 3	NA	NA	|| 1 | 1 | 1	NA	NA	NA	|| 1 | 1 | 1
AT4G18040		eukaryotic translation initiation factor 4E	NA	NA	|| 1 | 1 | 1	|| 1 | 1 | 1	NA	NA	NA
AT4G36820		Protein of unknown function (DUF607)	NA	NA	|| 1 | 1 | 1	NA	NA	NA	|| 1 | 1 | 1
AT4G36880		cysteine proteinase1	NA	NA	|| 1 | 1 | 1	|| 1 | 1 | 1	NA	NA	NA
AT5G04010		F-box family protein	NA	NA	|| 1 | 1 | 1	NA	NA	NA	|| 1 | 1 | 1
AT5G05080		ubiquitin-conjugating enzyme 22	NA	NA	NA	|| 1 | 1 | 1	NA	NA	|| 1 | 1 | 1
AT5G10550		global transcription factor group E2	NA	NA	|| 1 | 1 | 1	|| 1 | 1 | 1	NA	NA	NA
AT5G10840		Endomembrane protein 70 protein family	NA	NA	NA	|| 1 | 1 | 1	NA	NA	|| 1 | 1 | 1
AT5G11310		Pentatricopeptide repeat (PPR) superfamily protein	NA	NA	|| 1 | 1 | 1	|| 1 | 1 | 1	NA	NA	NA
AT5G19330		ARM repeat protein interacting with ABF2	NA	NA	|| 1 | 1 | 1	|| 1 | 1 | 1	NA	NA	NA
AT5G19610		GNOM-like 2	NA	NA	NA	|| 1 | 1 | 1	NA	NA	|| 1 | 1 | 1
AT5G22940		FRA8 homolog	NA	NA	|| 1 | 1 | 1	|| 1 | 1 | 1	NA	NA	NA
AT5G24160		squalene monoxygenase 6	NA	NA	NA	|| 1 | 1 | 1	NA	NA	|| 1 | 1 | 1
AT5G44240		aminophospholipid ATPase 2	NA	NA	|| 1 | 1 | 1	|| 1 | 1 | 1	NA	NA	NA
AT5G46100		Pentatricopeptide repeat (PPR) superfamily protein	NA	NA	|| 1 | 1 | 1	NA	NA	NA	|| 1 | 1 | 1
AT5G48360		Actin-binding FH2 (formin homology 2) family protein	NA	NA	NA	|| 1 | 1 | 1	NA	NA	|| 1 | 1 | 1
AT5G65460		kinesin like protein for actin based chloroplast movement 2	NA	NA	|| 1 | 1 | 1	|| 1 | 1 | 1	NA	NA	NA
AT1G10570		Cysteine proteinases superfamily protein	NA	NA	|| 1 | 1 | 1	NA	NA	NA	NA
AT1G11580		methylesterase PCR A	NA	NA	|| 1 | 1 | 1	NA	NA	NA	NA
AT1G11650		R0-binding (RRM/RBD/RNP motifs) family protein	NA	NA	NA	|| 1 | 1 | 1	NA	NA	NA
AT1G15680		F-box family protein	NA	NA	NA	NA	NA	NA	|| 1 | 1 | 1
AT1G17000		trehalose-phosphatase/synthase 3	NA	NA	|| 1 | 1 | 1	NA	NA	NA	NA
AT1G21580		Zinc finger C-x8-C-x5-C-x3-H type family protein	NA	NA	|| 1 | 1 | 1	NA	NA	NA	NA
AT1G22360		UDP-glucosyl transferase 85A2	NA	NA	|| 1 | 1 | 1	NA	NA	NA	NA
AT1G23480		cellulose synthase-like A3	NA	NA	NA	NA	NA	NA	|| 1 | 1 | 1
AT1G24320		Six-hairpin glycosidases superfamily protein	NA	NA	NA	NA	NA	NA	|| 1 | 1 | 1
AT1G35520		auxin response factor 15	NA	NA	|| 1 | 1 | 1	NA	NA	NA	NA
AT1G45249		abscisic acid responsive elements-binding factor 2	NA	NA	NA	NA	NA	NA	|| 1 | 1 | 1
AT1G55540		Nuclear pore complex protein	NA	NA	|| 1 | 1 | 1	NA	NA	NA	NA
AT1G59750		auxin response factor 1	NA	NA	NA	NA	NA	NA	|| 1 | 1 | 1
AT1G66360		Calcium-dependent lipid-binding (CaLB domain) family protein	NA	NA	NA	|| 1 | 1 | 1	NA	NA	NA
AT1G67070		Mannose-6-phosphate isomerase, type I	NA	NA	NA	|| 1 | 1 | 1	NA	NA	NA
AT1G78090		trehalose-6-phosphate phosphatase	NA	NA	|| 1 | 1 | 1	NA	NA	NA	NA
AT2G03260		EXS (ERD1/XPR1/SYG1) family protein	NA	NA	|| 1 | 1 | 1	NA	NA	NA	NA
AT2G04100		MATE efflux family protein	NA	NA	NA	|| 1 | 1 | 1	NA	NA	NA
AT2G05120		Nucleoporin, Nup133/Nup155-like	NA	NA	|| 1 | 1 | 1	NA	NA	NA	NA
AT2G07690		Minichromosome maintenance (MCM2/3/5) family protein	NA	NA	NA	NA	NA	NA	|| 1 | 1 | 1
AT2G10440			NA	NA	|| 1 | 1 | 1	NA	NA	NA	NA
AT2G18780		F-box and associated interaction domains-containing protein	NA	NA	NA	NA	NA	NA	|| 1 | 1 | 1
AT2G26670		Plant haem oxygenase (decyclizing) family protein	NA	NA	NA	|| 1 | 1 | 1	NA	NA	NA
AT2G26870		non-specific phospholipase C2	NA	NA	|| 1 | 1 | 1	NA	NA	NA	NA
AT2G27880		Argonaute family protein	NA	NA	NA	NA	NA	NA	|| 1 | 1 | 1
AT2G30800		helicase in vascular tissue and tapetum	NA	NA	NA	|| 1 | 1 | 1	NA	NA	NA
AT2G32920		PDI-like 2-3	NA	NA	|| 1 | 1 | 1	NA	NA	NA	NA
AT2G34160		Alba D0/R0-binding protein	NA	NA	NA	NA	NA	NA	|| 1 | 1 | 1
AT2G35230		VQ motif-containing protein	NA	NA	NA	NA	NA	3 || 0 | 0 | 0	NA
AT2G41370		Ankyrin repeat family protein / BTB/POZ domain-containing protein	NA	NA	|| 1 | 1 | 1	NA	NA	NA	NA
AT2G42100		Actin-like ATPase superfamily protein	NA	NA	|| 1 | 1 | 1	NA	NA	NA	NA
AT2G44080		ARGOS-like	NA	NA	NA	NA	NA	NA	|| 1 | 1 | 1
AT2G44590		DY0MIN-like 1D	NA	NA	NA	NA	NA	NA	|| 1 | 1 | 1
AT3G02620		Plant stearoyl-acyl-carrier-protein desaturase family protein	NA	NA	|| 1 | 1 | 1	NA	NA	NA	NA
AT3G03250		UDP-GLUCOSE PYROPHOSPHORYLASE 1	NA	NA	NA	NA	NA	NA	|| 1 | 1 | 1
AT3G05220		Heavy metal transport/detoxification superfamily protein	NA	NA	NA	NA	NA	NA	|| 1 | 1 | 1
AT3G06140		RING/U-box superfamily protein	NA	NA	NA	|| 1 | 1 | 1	NA	NA	NA
AT3G09030		BTB/POZ domain-containing protein	NA	NA	|| 1 | 1 | 1	NA	NA	NA	NA
AT3G09260		Glycosyl hydrolase superfamily protein	NA	NA	NA	NA	NA	3 || 0 | 0 | 0	NA
AT3G13825			NA	NA	NA	NA	NA	NA	|| 1 | 1 | 1
AT3G13930		Dihydrolipoamide acetyltransferase, long form protein	NA	NA	NA	NA	NA	NA	|| 1 | 1 | 1
AT3G14840		Leucine-rich repeat transmembrane protein kinase	NA	NA	NA	NA	NA	NA	|| 1 | 1 | 1
AT3G16030		lectin protein kinase family protein	NA	NA	NA	NA	NA	NA	|| 1 | 1 | 1
AT3G17700		cyclic nucleotide-binding transporter 1	NA	NA	NA	|| 1 | 1 | 1	NA	NA	NA
AT3G18010		WUSCHEL related homeobox 1	NA	NA	|| 1 | 1 | 1	NA	NA	NA	NA
AT3G18890		0D(P)-binding Rossmann-fold superfamily protein	NA	NA	NA	|| 1 | 1 | 1	NA	NA	NA
AT3G29230		Tetratricopeptide repeat (TPR)-like superfamily protein	NA	NA	|| 1 | 1 | 1	NA	NA	NA	NA
AT3G29290		Pentatricopeptide repeat (PPR) superfamily protein	NA	NA	NA	|| 1 | 1 | 1	NA	NA	NA
AT3G30540		Glycosyl hydrolase superfamily protein	NA	NA	NA	NA	NA	NA	|| 1 | 1 | 1
AT3G47400		Plant invertase/pectin methylesterase inhibitor superfamily	NA	NA	NA	NA	NA	NA	|| 1 | 1 | 1
AT3G50070		CYCLIN D3;3	NA	NA	|| 1 | 1 | 1	NA	NA	NA	NA
AT3G51120		D0 binding; zinc ion binding; nucleic acid binding	NA	NA	NA	NA	NA	NA	|| 1 | 1 | 1
AT3G53970		proteasome inhibitor-related	NA	NA	|| 1 | 1 | 1	NA	NA	NA	NA
AT3G59580		Plant regulator RWP-RK family protein	NA	NA	|| 1 | 1 | 1	NA	NA	NA	NA
AT3G61175		low-molecular-weight cysteine-rich 52	NA	NA	|| 1 | 1 | 1	NA	NA	NA	NA
AT3G61220		0D(P)-binding Rossmann-fold superfamily protein	NA	NA	NA	|| 1 | 1 | 1	NA	NA	NA
AT3G62590		alpha/beta-Hydrolases superfamily protein	NA	NA	|| 1 | 1 | 1	NA	NA	NA	NA
AT4G01120		G-box binding factor 2	NA	NA	|| 1 | 1 | 1	NA	NA	NA	NA
AT4G02390		poly(ADP-ribose) polymerase	NA	NA	NA	|| 1 | 1 | 1	NA	NA	NA
AT4G11310		Papain family cysteine protease	NA	NA	NA	NA	NA	NA	|| 1 | 1 | 1
AT4G13290		cytochrome P450, family 71, subfamily A, polypeptide 19	NA	NA	NA	NA	NA	NA	|| 1 | 1 | 1
AT4G15680		Thioredoxin superfamily protein	NA	NA	NA	|| 1 | 1 | 1	NA	NA	NA
AT4G18430		RAB GTPase homolog A1E	NA	NA	|| 1 | 1 | 1	NA	NA	NA	NA
AT4G20900		Tetratricopeptide repeat (TPR)-like superfamily protein	NA	NA	NA	NA	NA	NA	|| 1 | 1 | 1
AT4G21270		kinesin 1	NA	NA	|| 1 | 1 | 1	NA	NA	NA	NA
AT4G26330		Subtilisin-like serine endopeptidase family protein	NA	NA	|| 1 | 1 | 1	NA	NA	NA	NA
AT4G27110		COBRA-like protein 11 precursor	NA	NA	NA	|| 1 | 1 | 1	NA	NA	NA
AT4G29000		Tesmin/TSO1-like CXC domain-containing protein	NA	NA	NA	NA	NA	NA	|| 1 | 1 | 1
AT4G33240		1-phosphatidylinositol-4-phosphate 5-kinases; zinc ion binding; 1-phosphatidylinositol-3-phosphate 5-kinases	NA	NA	NA	NA	NA	NA	|| 1 | 1 | 1
AT4G34190		stress enhanced protein 1	NA	NA	|| 1 | 1 | 1	NA	NA	NA	NA
AT4G34330		Protein of unknown function (DUF677)	NA	NA	NA	|| 1 | 1 | 1	NA	NA	NA
AT4G35000		ascorbate peroxidase 3	NA	NA	|| 1 | 1 | 1	NA	NA	NA	NA
AT4G35900		Basic-leucine zipper (bZIP) transcription factor family protein	NA	NA	NA	NA	NA	NA	|| 1 | 1 | 1
AT4G38520		Protein phosphatase 2C family protein	NA	NA	|| 1 | 1 | 1	NA	NA	NA	NA
AT4G39920		C-CAP/cofactor C-like domain-containing protein	NA	NA	|| 1 | 1 | 1	NA	NA	NA	NA
AT5G02310		proteolysis 6	NA	NA	|| 1 | 1 | 1	NA	NA	NA	NA
AT5G03200		RING/U-box superfamily protein	NA	NA	NA	NA	NA	NA	|| 1 | 1 | 1
AT5G04900		NYC1-like	NA	NA	|| 1 | 1 | 1	NA	NA	NA	NA
AT5G06830			NA	NA	|| 1 | 1 | 1	NA	NA	NA	NA
AT5G11190		Integrase-type D0-binding superfamily protein	NA	NA	NA	NA	NA	NA	|| 1 | 1 | 1
AT5G13130		Histidine kinase-, D0 gyrase B-, and HSP90-like ATPase family protein	NA	NA	|| 1 | 1 | 1	NA	NA	NA	NA
AT5G15400		U-box domain-containing protein	NA	NA	NA	|| 1 | 1 | 1	NA	NA	NA
AT5G16590		Leucine-rich repeat protein kinase family protein	NA	NA	|| 1 | 1 | 1	NA	NA	NA	NA
AT5G18525		protein serine/threonine kinases; protein tyrosine kinases; ATP binding; protein kinases	NA	NA	NA	|| 1 | 1 | 1	NA	NA	NA
AT5G20240		K-box region and MADS-box transcription factor family protein	NA	NA	|| 1 | 1 | 1	NA	NA	NA	NA
AT5G22920		CHY-type/CTCHY-type/RING-type Zinc finger protein	NA	NA	|| 1 | 1 | 1	NA	NA	NA	NA
AT5G24300		Glycogen/starch synthases, ADP-glucose type	NA	NA	NA	NA	NA	NA	|| 1 | 1 | 1
AT5G27060		receptor like protein 53	NA	NA	|| 1 | 1 | 1	NA	NA	NA	NA
AT5G45060		Disease resistance protein (TIR-NBS-LRR class) family	NA	NA	NA	NA	NA	NA	|| 1 | 1 | 1
AT5G45830		delay of germination 1	NA	NA	NA	|| 1 | 1 | 1	NA	NA	NA
AT5G46040		Major facilitator superfamily protein	NA	NA	NA	|| 1 | 1 | 1	NA	NA	NA
AT5G47030		ATPase, F1 complex, delta/epsilon subunit	NA	NA	|| 1 | 1 | 1	NA	NA	NA	NA
AT5G48600		structural maintenance of chromosome 3	NA	NA	NA	NA	NA	NA	|| 1 | 1 | 1
AT5G50230		Transducin/WD40 repeat-like superfamily protein	NA	NA	NA	|| 1 | 1 | 1	NA	NA	NA
AT5G50320		radical SAM domain-containing protein / GCN5-related N-acetyltransferase (G0T) family protein	NA	NA	|| 1 | 1 | 1	NA	NA	NA	NA
AT5G52870			NA	NA	NA	NA	NA	NA	|| 1 | 1 | 1
AT5G53830		VQ motif-containing protein	NA	NA	|| 1 | 1 | 1	NA	NA	NA	NA
AT5G55380		MBOAT (membrane bound O-acyl transferase) family protein	NA	NA	NA	|| 1 | 1 | 1	NA	NA	NA
AT5G57900		SKP1 interacting partner 1	NA	NA	NA	NA	NA	NA	|| 1 | 1 | 1
AT5G60780		nitrate transporter 2.3	NA	NA	NA	NA	NA	NA	|| 1 | 1 | 1
AT5G61230		Ankyrin repeat family protein	NA	NA	|| 1 | 1 | 1	NA	NA	NA	NA
AT5G65630		global transcription factor group E7	NA	NA	NA	NA	NA	NA	|| 1 | 1 | 1
AT4G02770		photosystem I subunit D-1	NA	NA	NA	NA	NA	2 || 0 | 0 | 0	NA
AT1G06680		photosystem II subunit P-1	NA	NA	NA	NA	NA	1 || 0 | 0 | 0	NA

## Sheet: Supp_Table6
Supplemental Table 6. List of previously published protein-protein interactions used to generate the protein network (Figure 5b).
Bait_AGI	Bait_name	Prey_AGI	Prey_name	Exp_method	First_Author	Year	PMID	In_Set1	In_Set2	Pub+Ours	Node1	Edge	Node2
AT5G37380	SLN	AT3G46580	MBD5	IP-MS	Ichino	2021	34083448	NA	No	No
AT5G37380	SLN	AT5G59380	MBD6	IP-MS	Ichino	2021	34083448	Yes	No	Yes	SLN	PublishedAndTAP	MBD6
AT3G46580	MBD5	AT5G59380	MBD6	IP-MS	Ichino	2021	34083448	NA	Yes	Yes	MBD5	PublishedAndTAP	MBD6
AT3G46580	MBD5	At1G76440	ACD15.5	IP-MS	Ichino	2021	34083448	NA	No	No
AT3G46580	MBD5	At1G54850	ACD21.4	IP-MS	Ichino	2021	34083448	NA	Yes	Yes	MBD5	PublishedAndTAP	ACD21.4
AT3G46580	MBD5	AT1G20870	IDM3	IP-MS	Ichino	2021	34083448	NA	No	No
AT3G46580	MBD5	AT5G37380	SLN	IP-MS	Ichino	2021	34083448	NA	No	No
AT3G46580	MBD5	AT5G04940	SUVH1	IP-MS	Ichino	2021	34083448	NA	Yes	Yes	MBD5	PublishedAndTAP	SUVH1
AT3G46580	MBD5	AT1G73100	SUVH3	IP-MS	Ichino	2021	34083448	NA	No	No
AT3G46580	MBD5	AT5G64360	DNAJ1/SDJ1	IP-MS	Ichino	2021	34083448	NA	No	No
AT3G46580	MBD5	AT2G01710	DNAJ2/SDJ2/MCR5	IP-MS	Ichino	2021	34083448	NA	No	No
AT5G59380	MBD6	AT3G46580	MBD5	IP-MS	Ichino	2021	34083448	Yes	Yes	Yes	MBD6	PublishedAndTAP	MBD5
AT5G59380	MBD6	At1G76440	ACD15.5	IP-MS	Ichino	2021	34083448	Yes	Yes	Yes	MBD6	PublishedAndTAP	ACD15.5
AT5G59380	MBD6	At1G54850	ACD21.4	IP-MS	Ichino	2021	34083448	Yes	No	Yes	MBD6	PublishedAndTAP	ACD21.4
AT5G59380	MBD6	AT1G20870	IDM3	IP-MS	Ichino	2021	34083448	Yes	No	Yes	MBD6	PublishedAndTAP	IDM3
AT5G59380	MBD6	AT5G37380	SLN	IP-MS	Ichino	2021	34083448	Yes	No	Yes	MBD6	PublishedAndTAP	SLN
AT5G59380	MBD6	AT5G04940	SUVH1	IP-MS	Ichino	2021	34083448	Yes	Yes	Yes	MBD6	PublishedAndTAP	SUVH1
AT5G59380	MBD6	AT1G73100	SUVH3	IP-MS	Ichino	2021	34083448	No	No	No
AT5G59380	MBD6	AT5G64360	DNAJ1	IP-MS	Ichino	2021	34083448	No	No	No
AT5G59380	MBD6	AT2G01710	DNAJ2	IP-MS	Ichino	2021	34083448	Yes	No	Yes	MBD6	PublishedAndTAP	DNAJ2
AT5G04940	SUVH1	AT1G73100	SUVH3	IP-MS	Harris	2018	30523112	Yes	Yes	Yes	SUVH1	PublishedAndTAP	SUVH3
AT5G04940	SUVH1	AT5G64360	DNAJ1/SDJ1	IP-MS	Harris	2018	30523112	Yes	No	Yes	SUVH1	PublishedAndTAP	DNAJ1/SDJ1
AT5G04940	SUVH1	AT2G01710	DNAJ2/SDJ2/MCR5	IP-MS	Harris	2018	30523112	Yes	No	Yes	SUVH1	PublishedAndTAP	DNAJ2/SDJ2/MCR5
AT1G73100	SUVH3	AT5G04940	SUVH1	IP-MS	Harris	2018	30523112	NA	Yes	Yes	SUVH3	PublishedAndTAP	SUVH1
AT1G73100	SUVH3	AT5G64360	DNAJ1/SDJ1	IP-MS	Harris	2018	30523112	NA	No	No
AT1G73100	SUVH3	AT2G01710	DNAJ2/SDJ2/MCR5	IP-MS	Harris	2018	30523112	NA	No	No
AT5G04940	SUVH1	AT5G64360	DNAJ1/SDJ1	IP-MS	Zhao	2019	30589221	Yes	No	Yes	SUVH1	PublishedAndTAP	DNAJ1/SDJ1
AT5G04940	SUVH1	AT2G01710	DNAJ2/SDJ2/MCR5	IP-MS	Zhao	2019	30589221	Yes	No	Yes	SUVH1	PublishedAndTAP	DNAJ2/SDJ2/MCR5
AT5G04940	SUVH1	AT1G62970	SDJ3	IP-MS	Zhao	2019	30589221	Yes	No	Yes	SUVH1	PublishedAndTAP	SDJ3
AT1G73100	SUVH3	AT5G64360	DNAJ1/SDJ1	IP-MS	Zhao	2019	30589221	NA	No	No
AT1G73100	SUVH3	AT2G01710	DNAJ2/SDJ2/MCR5	IP-MS	Zhao	2019	30589221	NA	No	No
AT1G73100	SUVH3	AT1G62970	SDJ3	IP-MS	Zhao	2019	30589221	NA	No	No
AT1G20870	IDM3/LIL	AT3G46580	MBD5	Y2H	Li	2017	28452714	NA	No	No
AT1G20870	IDM3/LIL	AT5G59380	MBD6	Y2H	Li	2017	28452714	Yes	No	Yes	IDM3/LIL	PublishedAndTAP	MBD6
AT3G46580	MBD5	At1G76440	ACD15.5	IP-MS	Li	2017	28452714	NA	No	No
AT3G46580	MBD5	At1G54850	ACD21.4	IP-MS	Li	2017	28452714	NA	Yes	Yes	MBD5	PublishedAndTAP	ACD21.4
AT3G46580	MBD5	AT5G59380	MBD6	IP-MS	Li	2017	28452714	NA	Yes	Yes	MBD5	PublishedAndTAP	MBD6
AT3G14980	IDM1	AT5G59380	MBD6	IP-MS	Li	2015	25933434	No	No	No
AT1G20870	IDM3/IDL1	AT5G59380	MBD6	IP-MS	Li	2015	25933434	Yes	No	Yes	IDM3/IDL1	PublishedAndTAP	MBD6
AT3G55350	HHP1	AT3G63030	MBD4	IP-MS	Zhou	2021	33960113	No	No	No
AT3G55350	HHP1	AT4G22745	MBD1	IP-MS	Zhou	2021	33960113	No	No	No
AT3G55350	HHP1	AT5G35330	MBD2	IP-MS	Zhou	2021	33960113	No	No	No
AT5G63110	HDA6	AT3G63030	MBD4	IP-MS	Zhou	2021	33960113	NA	No	No
AT5G63110	HDA6	AT4G22745	MBD1	IP-MS	Zhou	2021	33960113	Yes	No	Yes	HDA6	PublishedAndTAP	MBD1
AT4G22745	MBD1	AT5G35330	MBD2	LCI	Zhou	2021	33960113	No	No	No
AT4G22745	MBD1	AT3G63030	MBD4	LCI	Zhou	2021	33960113	No	No	No
AT4G22745	MBD1	AT2G47820	SANT3	LCI	Zhou	2021	33960113	Yes	No	Yes	MBD1	PublishedAndTAP	SANT3
AT4G22745	MBD1	AT5G63110	HDA6	LCI	Zhou	2021	33960113	Yes	No	Yes	MBD1	PublishedAndTAP	HDA6
AT5G63110	HDA6	AT3G63030	MBD4	LCI	Zhou	2021	33960113	NA	No	No
AT5G63110	HDA6	AT4G22745	MBD1	LCI	Zhou	2021	33960113	Yes	No	Yes	HDA6	PublishedAndTAP	MBD1
AT5G63110	HDA6	AT5G35330	MBD2	LCI	Zhou	2021	33960113	Yes	No	Yes	HDA6	PublishedAndTAP	MBD2
AT5G35330	MBD2	AT3G55350	HHP1	LCI	Zhou	2021	33960113	No	No	No
AT5G35330	MBD2	AT4G22745	MBD1	LCI	Zhou	2021	33960113	No	No	No
AT5G35330	MBD2	AT2G47820	SANT3	LCI	Zhou	2021	33960113	Yes	No	Yes	MBD2	PublishedAndTAP	SANT3
AT5G35330	MBD2	AT5G63110	HDA6	LCI	Zhou	2021	33960113	Yes	No	Yes	MBD2	PublishedAndTAP	HDA6
AT5G35330	MBD2	AT3G63030	MBD4	LCI	Zhou	2021	33960113	No	No	No
AT5G35330	MBD2	AT1G09050	SANT1	LCI	Zhou	2021	33960113	No	No	No
AT5G35330	MBD2	AT1G09040	SANT2	LCI	Zhou	2021	33960113	No	No	No
AT3G63030	MBD4	AT3G55350	HHP1	LCI	Zhou	2021	33960113	NA	No	No
AT3G63030	MBD4	AT4G22745	MBD1	LCI	Zhou	2021	33960113	NA	No	No
AT3G63030	MBD4	AT5G35330	MBD2	LCI	Zhou	2021	33960113	NA	No	No
AT3G63030	MBD4	AT2G47820	SANT3	LCI	Zhou	2021	33960113	NA	No	No
AT3G63030	MBD4	AT5G63110	HDA6	LCI	Zhou	2021	33960113	NA	No	No
AT4G22745	MBD1	AT5G35330	MBD2	AP-MS	Feng	2021	34144927	No	No	No
AT4G22745	MBD1	AT3G63030	MBD4	AP-MS	Feng	2021	34144927	No	No	No
AT4G22745	MBD1	AT5G63110	HDA6	AP-MS	Feng	2021	34144927	Yes	No	Yes	MBD1	PublishedAndTAP	HDA6
AT4G22745	MBD1	AT4G38130	HDA19	AP-MS	Feng	2021	34144927	Yes	No	Yes	MBD1	PublishedAndTAP	HDA19
AT4G22745	MBD1	AT3G17880	HIP2	AP-MS	Feng	2021	34144927	Yes	No	Yes	MBD1	PublishedAndTAP	HIP2
AT4G22745	MBD1	AT4G22670	HIP1	AP-MS	Feng	2021	34144927	No	No	No
AT4G22745	MBD1	AT2G47820	SANT3	AP-MS	Feng	2021	34144927	Yes	No	Yes	MBD1	PublishedAndTAP	SANT3
AT4G22745	MBD1	AT1G09050	SANT1	AP-MS	Feng	2021	34144927	No	No	No
AT4G22745	MBD1	AT1G55050	SANT4	AP-MS	Feng	2021	34144927	No	No	No
AT4G22745	MBD1	AT3G55350	HHP1/HARB1	AP-MS	Feng	2021	34144927	No	No	No
AT4G22745	MBD1	AT5G58230	MSI1	AP-MS	Feng	2021	34144927	No	No	No
AT4G22745	MBD1	AT2G19520	FVE	AP-MS	Feng	2021	34144927	No	No	No
AT4G22745	MBD1	AT5G08450	RXT3	AP-MS	Feng	2021	34144927	No	No	No
AT5G35330	MBD2	AT5G63110	HDA6	AP-MS	Feng	2021	34144927	Yes	No	Yes	MBD2	PublishedAndTAP	HDA6
AT5G35330	MBD2	AT4G38130	HDA19	AP-MS	Feng	2021	34144927	No	No	No
AT5G35330	MBD2	AT3G17880	HIP2	AP-MS	Feng	2021	34144927	Yes	No	Yes	MBD2	PublishedAndTAP	HIP2
AT5G35330	MBD2	AT4G22670	HIP1	AP-MS	Feng	2021	34144927	No	No	No
AT5G35330	MBD2	AT2G47820	SANT3	AP-MS	Feng	2021	34144927	Yes	No	Yes	MBD2	PublishedAndTAP	SANT3
AT5G35330	MBD2	AT3G55350	HHP1/HARB1	AP-MS	Feng	2021	34144927	No	No	No
AT5G35330	MBD2	AT5G58230	MSI1	AP-MS	Feng	2021	34144927	No	No	No
AT5G35330	MBD2	AT2G19520	FVE	AP-MS	Feng	2021	34144927	No	No	No
AT5G35330	MBD2	AT4G11400	ARID1H	AP-MS	Feng	2021	34144927	No	No	No
AT3G63030	MBD4	AT4G22745	MBD1	AP-MS	Feng	2021	34144927	NA	No	No
AT3G63030	MBD4	AT5G63110	HDA6	AP-MS	Feng	2021	34144927	NA	No	No
AT3G63030	MBD4	AT4G38130	HDA19	AP-MS	Feng	2021	34144927	NA	No	No
AT3G63030	MBD4	AT3G17880	HIP2	AP-MS	Feng	2021	34144927	NA	No	No
AT3G63030	MBD4	AT4G22670	HIP1	AP-MS	Feng	2021	34144927	NA	No	No
AT3G63030	MBD4	AT2G47820	SANT3	AP-MS	Feng	2021	34144927	NA	No	No
AT3G63030	MBD4	AT1G09050	SANT1	AP-MS	Feng	2021	34144927	NA	No	No
AT3G63030	MBD4	AT3G55350	HHP1/HARB1	AP-MS	Feng	2021	34144927	NA	No	No
AT3G63030	MBD4	AT1G13880	ESANT2	AP-MS	Feng	2021	34144927	NA	No	No

## Sheet: Supp_Table7
Supplemental Table 7. List of primers used in this study.
ID	Sequence	Role
PJ449	ATTTTGCCGATTTCGGAAC	Genotyping SALK lines (SALK_LBb1.3)
PJ451	TAGCATCTGAATTTCATAACCAATCTCGATACAC	Genotyping SAIL lines (SAIL_LB3)
PJ455	ATAATAACGCTGCGGACATCTACATTTT	Genotyping GABI lines (GABI_8474LB)
PJ456	CAGCTCCTGAGGTGAGATCTG	Genotyping SUVH3-T For
PJ458	CTTTTCGGAAACCCTATTTCG	Genotyping SUVH1-T and -cr For
PJ466	ACGAGACTTGAGCTTCTTCCC	Genotyping MBD1-T and -cr For
PJ469	TAATTATGTGCCTGAATCCGG	Genotyping MBD2-T For
PJ495	CAGGAGTTTAGCAATGCAAGG	Genotyping SUVH3-T Rev
PJ497	GTGGCGATAGGTTCTTCTTCC	Genotyping SUVH1-T and -cr Rev
PJ505	CTGCTCTTTGATTCGATTTCG	Genotyping MBD1-T Rev
PJ508	GCATTGTCATGCACAAAATTG	Genotyping MBD2-T Rev
PJ547	GTTGTGTGGTTTAAACaaaaaagcatatcttgagatccgcatccat	cloning SUVH1 5' For (PmeI overhang)
PJ548	ttgtgtgCCTAGGTCCAAATGAGCCACGGCAATACG	cloning SUVH1 5' Rev (AvrII overhang)
PJ557	GTTGTGTGGTTTAAACgacgtaccacatactttctgtatgtttttgatcga	cloning MBD1 5' For (PmeI overhang)
PJ558	ttgtgtgCCTAGGATCAATTGTAACTTTCCTTGATGGCTTGGG	cloning MBD1 5' Rev (AvrII overhang)
PJ561	GTTGTGTGGTTTAAACtacccgaagtcgcaggcctaatattttata	cloning MBD2 5' For (PmeI overhang)
PJ562	ttgtgtgCCTAGGTCTATCAGCAAGTTCGTCGTTGGAG	cloning MBD2 5' Rev (AvrII overhang)
PJ591	GTTGTGTGGTTTAAACcaatttccactcccaatgtactatatataagcgact	cloning MBD6 5' For (PmeI overhang)
PJ592	ttgtgtgCCTAGGAGCCGACACTTTACTAGGGTTTCG	cloning MBD6 5' Rev (AvrII overhang)
PJ593	GTTGTGTGGATATCAGACTATGATGACCTGGTGGCGATT	cloning MBD6 3' For (EcoRV overhang)
PJ594	GTTGTGTGGATATCgtcttgtatcagtgcagtattgttgatgtttct	cloning MBD6 3' Rev (EcoRV overhang)
PJ595	AAACAATTTCCACTCCCAATG	Genotyping MBD6-T For
PJ596	TGCTTAAGCAGAACCAACCAC	Genotyping MBD6-T and -cr Rev
PJ612	GTTTCCTTTGCTCTGTTTTATGA	Genotyping MBD2-cr For
PJ676	CGAGAGGGCTAAAGTAAATGG	Genotyping SUVH3-cr For
PJ677	TCTCTAACAAAGAGCTCTGAG	Genotyping MBD1-cr For
PJ678	CCAGACGGAGCAACATAATAAC	Genotyping MBD2-cr For
PJ679	caaaagcccaaaaactgcaacg	Genotyping MBD5-cr For
PJ680	AACAGTTCAGGTAAAACACGG	Genotyping MBD5-cr Rev
PJ681	ctcggttaaatggatgtggtct	Genotyping MBD6-cr For
PJ721	GTTGTGTGGTTTAAACgataatgaagataaacagaatcactgatcttcctc	cloning MBD4 5' For (PmeI overhang)
PJ722	ttgtgtgCCTAGGGTTATGGCTCTGCTTGACACTGC	cloning MBD4 5' For and Genotyping MBD4-cr (AvrII overhang)
PJ723	GGTGCTTGGAAGTAAATTGTTGGTAG	Genotyping MBD4-cr Rev
PJ724	caatctgatccaagctcaagctaagctttcatggttcgaaatttggagtaaaaaggattg	cloning SUVH3 5' For (RB overhang for GA)
PJ725	ctccagcttccacccctaggTCCGAATGAACCACGACATTGC	cloning SUVH3 5' Rev (SHH overhang for GA)
PJ728	ctgatccaagctcaagctaagcttaacatctaaaatctcaacagttaagtctctacatcc	cloning MBD5 5' For (RB overhang for GA)
PJ729	ctccagcttccacccctaggGAACATCGTTTTTCCAGCGTTTTGG	cloning MBD5 5' Rev (SHH overhang for GA)
PJ684	gagccttcgttggttactcctt	qRT-PCR for SUVH1 For
PJ685	cgaaattcatattctcaggccg	qRT-PCR for SUVH1 Rev
PJ690	CCAACAACCATTAAGGTGCAGA	qRT-PCR for MBD1 For
PJ691	CGGGTCCTCTTGTACTCTACTTC	qRT-PCR for MBD1 Rev
PJ692	GGAGGTACCAGATTTGCTGATG	qRT-PCR for MBD2 For
PJ693	GGGATTTGAAACGAGAACTGTG	qRT-PCR for MBD2 Rev
PJ694	TTTCTGGTTCGGGAGAGAGC	qRT-PCR for MBD6 For
PJ695	GGTTCGTAATAGTACTTATCCACCG	qRT-PCR for MBD6 Rev
PJ719	AGGGAGGAGGATCTGGAGGTG	qRT-PCR for the SHH Tag For
PJ720	TGATGGTGATGAGCGTAATCTGGA	qRT-PCR for the SHH Tag Rev
PJ735	CACGGAAACGTGCGACGCCA	qRT-PCR for MBD5 For
PJ736	CGACCCGTAATCGGTTCGTAG	qRT-PCR for MBD5 Rev
PJ739	GAATCTGGGGAAGTAAGTGAG	qRT-PCR for MBD4 For
PJ740	GGTATCAATCAACCTCCCAG	qRT-PCR for MBD4 Rev
PJ741	AAGAAGAGAGTTGGGACGGTTC	qRT-PCR for SUVH3 For
PJ742	AGTCAATGCCAGCCATAGTCTG	qRT-PCR for SUVH3 Rev

## Sheet: Supp_Table8
Supplemental Table 8. Mapping statistics of sequencing in this study
Sample	Experiment	Total Reads	Total Fragments	Mapped
mbd1_2_4_a	RNA-seq	95133628	47566814	0.731
mbd1_2_4_b	RNA-seq	95379308	47689654	0.845
mbd1_2_4_c	RNA-seq	102069538	51034769	0.862
mbd1_2_5_6_a	RNA-seq	105048646	52524323	0.826
mbd1_2_5_6_b	RNA-seq	106835410	53417705	0.813
mbd1_2_5_6_c	RNA-seq	97998282	48999141	0.858
mbd2_5_6_a	RNA-seq	99502944	49751472	0.848
mbd2_5_6_b	RNA-seq	109545236	54772618	0.828
mbd2_5_6_c	RNA-seq	114844252	57422126	0.828
suvh1_3_a	RNA-seq	90769130	45384565	0.861
suvh1_3_b	RNA-seq	104387400	52193700	0.842
suvh1_3_c	RNA-seq	101777942	50888971	0.831
WT_a	RNA-seq	103576040	51788020	0.86
WT_b	RNA-seq	105259934	52629967	0.855
WT_c	RNA-seq	98184936	49092468	0.82
Sample	Experiment	Total Reads	Uniquely mapped	Multi-mappers
WT_rep1	ChIP-seq	16172263	9,572,518 (59.19%)	3,614,231 (22.35%)
MBD1_rep1	ChIP-seq	19146504	12,264,063 (64.05%)	3,851,751 (20.12%)
MBD1_rep2	ChIP-seq	19411338	14,657,772 (75.51%)	2,827,690 (14.57%)
MBD2_rep1	ChIP-seq	21991141	14,903,858 (67.77%)	5,440,882 (24.74%)
MBD2_rep2	ChIP-seq	22892252	16,097,760 (70.32%)	3,763,186 (16.44%)
SUVH1_rep1	ChIP-seq	26262372	16,650,592 (63.40%)	7,059,899 (26.88%)
SUVH1_rep2	ChIP-seq	24642770	14,333,360 (58.16%)	5,932,628 (24.07%)
MBD6_rep1	ChIP-seq	25596964	18,250,635 (71.3%)	6,383,883 (24.94%)
WT_rep1_input	ChIP-seq	19585591	14,453,534 (73.80%)	5,016,952 (25.62%)
MBD1_rep1_input	ChIP-seq	18247155	13,442,915 (73.67%)	4,692,773 (25.72%)
MBD1_rep2_input	ChIP-seq	18911735	15,013,870 (79.39%)	3,792,720 (20.05%)
MBD2_rep1_input	ChIP-seq	19577769	14,261,110 (72.84%)	5,172,605 (26.42%)
MBD2_rep2_input	ChIP-seq	19786657	15,660,645 (79.15%)	4,020,084 (20.32%)
SUVH1_rep1_input	ChIP-seq	28805086	20,437,563 (70.95%)	8,212,551 (28.51%)
SUVH1_rep2_input	ChIP-seq	28184581	19,518,142 (69.25%)	7,649,741 (27.14%)
MBD6_rep1_input	ChIP-seq	25596964	18,249,920 (71.30%)	6,383,396 (24.94%)
Sample	Experiment	Total Reads	Uniquely mapped	Non-conversion rate
WT	MethylC-seq	31671807	25,103,251 (79.3%)	0.0035
suvh1	MethylC-seq	32596559	25,926,035 (79.5%)	0.004
suvh3	MethylC-seq	43417592	32,759,144 (75.5%)	0.0032
mbd1	MethylC-seq	35783928	27,261,987 (76.2%)	0.0032
mbd6	MethylC-seq	34629953	26,144,763 (75.5%)	0.0031
WT	MethylC-seq	35292083	26,524,060 (75.2%)	0.0044
mbd2	MethylC-seq	29035809	21,834,825 (75.2%)	0.0049
mbd5	MethylC-seq	26682167	20,725,040 (77.7%)	0.0066
mbd1;2	MethylC-seq	29511744	22,740,752 (77.1%)	0.0042
mbd1;4	MethylC-seq	28013281	21,423,772 (76.5%)	0.005
mbd5;6	MethylC-seq	27842882	21,333,232 (76.6%)	0.006
hdg11;12	MethylC-seq	28057669	21,089,395 (75.2%)	0.0054
mbd1;2;4	MethylC-seq	26616086	21,764,181 (81.8%)	0.004
suvh1;3	MethylC-seq	29820042	22,900,083 (76.8%)	0.0069
mbd2;5;6	MethylC-seq	24610699	19,880,341 (80.8%)	0.005
mbd1;2;5;6	MethylC-seq	29898354	24,397,811 (81.6%)	0.0048
Sample	Experiment	Total Reads	Uniquely mapped	Multi-mappers
mbd1_2_4_H2AKub	ChIP-seq	12710972	10666426 (83.92%)	890686 (7.01%)
mbd1_2_4_H3K27me3	ChIP-seq	10677434	8662220 (81.13%)	1172951 (10.99%)
mbd1_2_4_H3K4me1	ChIP-seq	11048008	9956605 (90.12%)	623691 (5.65%)
mbd1_2_4_H3K9me2	ChIP-seq	9309368	2331056 (25.04%)	6125076 (65.79%)
mbd1_2_4_input	ChIP-seq	14101360	10222029 (72.49%)	3603922 (25.56%)
mbd1_2_5_6_H2AKub	ChIP-seq	13204260	11218096 (84.96%)	877458 (6.65%)
mbd1_2_5_6_H3K27me3	ChIP-seq	10215959	8111720 (79.40%)	914010 (8.95%)
mbd1_2_5_6_H3K4me1	ChIP-seq	11673804	10493107 (89.89%)	607542 (5.20%)
mbd1_2_5_6_H3K9me2	ChIP-seq	9140635	2332965 (25.52%)	5960190 (65.21%)
mbd1_2_5_6_input	ChIP-seq	12524259	9211456 (73.55%)	3066505 (24.48%)
mbd1_4_H2AKub	ChIP-seq	14487971	12432384 (85.81%)	1117940 (7.72%)
mbd1_4_H3K27ac	ChIP-seq	9308602	8041960 (86.39%)	1110151 (11.93%)
mbd1_4_H3K27me3	ChIP-seq	13601329	11229037 (82.56%)	1824476 (13.41%)
mbd1_4_H3K36me3	ChIP-seq	12000229	11397548 (94.98%)	478279 (3.99%)
mbd1_4_H3K4me1	ChIP-seq	11779491	10893226 (92.48%)	733994 (6.23%)
mbd1_4_H3K4me2	ChIP-seq	9797297	9183368 (93.73%)	499997 (5.10%)
mbd1_4_H3K4me3	ChIP-seq	12716556	12063443 (94.86%)	491654 (3.87%)
mbd1_4_H3K9me2	ChIP-seq	12751579	3313133 (25.98%)	8785307 (68.90%)
mbd1_4_input	ChIP-seq	12463088	9074895 (72.81%)	3215166 (25.80%)
mbd1_H2AKub	ChIP-seq	16004171	13796601 (86.21%)	1096626 (6.85%)
mbd1_H3K27ac	ChIP-seq	10611497	8888196 (83.76%)	1514944 (14.28%)
mbd1_H3K27me3	ChIP-seq	12971865	10343283 (79.74%)	2037421 (15.71%)
mbd1_H3K36me3	ChIP-seq	10863888	10193186 (93.83%)	436652 (4.02%)
mbd1_H3K4me1	ChIP-seq	12819329	11801008 (92.06%)	791008 (6.17%)
mbd1_H3K4me2	ChIP-seq	13750748	12875831 (93.64%)	693401 (5.04%)
mbd1_H3K4me3	ChIP-seq	12692214	12079350 (95.17%)	448889 (3.54%)
mbd1_H3K9me2	ChIP-seq	11207562	2532423 (22.60%)	8014318 (71.51%)
mbd1_Input	ChIP-seq	12993842	9160790 (70.50%)	3648882 (28.08%)
mbd2_5_6_H2AKub	ChIP-seq	17137020	15109599 (88.17%)	944310 (5.51%)
mbd2_5_6_H3K27me3	ChIP-seq	10850169	8752185 (80.66%)	910448 (8.39%)
mbd2_5_6_H3K4me1	ChIP-seq	11854107	10622755 (89.61%)	591173 (4.99%)
mbd2_5_6_H3K9me2	ChIP-seq	8479798	2125747 (25.07%)	5509834 (64.98%)
mbd2_5_6_Input	ChIP-seq	14889876	11073923 (74.37%)	3512048 (23.59%)
mbd2_H2AKub	ChIP-seq	6084269	4806697 (79.00%)	519093 (8.53%)
mbd2_H3K27ac	ChIP-seq	5190616	4378673 (84.36%)	639108 (12.31%)
mbd2_H3K27me3	ChIP-seq	8056855	4642486 (57.62%)	1181524 (14.66%)
mbd2_H3K36me3	ChIP-seq	5156305	4722869 (91.59%)	220157 (4.27%)
mbd2_H3K4me1	ChIP-seq	4583120	4050562 (88.38%)	344335 (7.51%)
mbd2_H3K4me2	ChIP-seq	5786217	5333802 (92.18%)	301250 (5.21%)
mbd2_H3K4me3	ChIP-seq	5115579	4793129 (93.70%)	196167 (3.83%)
mbd2_H3K9me2	ChIP-seq	4254024	955786 (22.47%)	2972337 (69.87%)
mbd2_Input	ChIP-seq	5888069	3291460 (55.90%)	1326765 (22.53%)
mbd5_6_H3K9me2	ChIP-seq	5758934	1317265 (22.87%)	4054753 (70.41%)
mbd5_6_Input	ChIP-seq	15742090	8882531 (56.43%)	3663248 (23.27%)
WT_Input	ChIP-seq	7070752	4148146 (58.67%)	1533605 (21.69%)
WT_H2AKub	ChIP-seq	6933964	5889049 (84.93%)	486815 (07.02%)
WT_H3K4me1	ChIP-seq	7076753	6357585 (89.84%)	506237 (07.15%)
WT_H3K4me2	ChIP-seq	6739937	6238454 (92.56%)	351584 (05.22%)
WT_H3K4me3	ChIP-seq	4788315	4513760 (94.27%)	178693 (03.73%)
WT_H3K36me3	ChIP-seq	5989187	5557574 (92.79%)	251997 (04.21%)
WT_H3K27me3	ChIP-seq	5613496	4164954 (74.20%)	802811 (14.30%)
WT_H3K27ac	ChIP-seq	6861416	5912781 (86.17%)	775846 (11.31%)
WT_H3K9me2	ChIP-seq	7976078	2102405 (26.36%)	5339972 (66.95%)
SUVH1_3_Input	ChIP-seq	14600218	11021156 (75.49%)	3216198 (22.03%)
SUVH1_3_H2AKub	ChIP-seq	12324345	10603206 (86.03%)	710930 (05.77%)
SUVH1_3_H3K4me1	ChIP-seq	9181250	8225558 (89.59%)	456468 (04.97%)
SUVH1_3_H3K27me3	ChIP-seq	11215579	8852362 (78.93%)	922206 (08.22%)
SUVH1_3_H3K9me2	ChIP-seq	8336857	2364855 (28.37%)	5106185 (61.25%)

## Sheet: Supp_Table9
Supplemental Table 9. Methylation status of Arabidopsis genes
gene_ID	Methylation_status
AT1G01040	gbM
AT1G01050	gbM
AT1G01060	gbM
AT1G01150	gbM
AT1G01220	gbM
AT1G01230	gbM
AT1G01260	gbM
AT1G01320	gbM
AT1G01340	gbM
AT1G01350	gbM
AT1G01440	gbM
AT1G01450	gbM
AT1G01510	gbM
AT1G01540	gbM
AT1G01650	gbM
AT1G01660	gbM
AT1G01670	gbM
AT1G01680	gbM
AT1G01690	gbM
AT1G01710	gbM
AT1G01750	gbM
AT1G01760	gbM
AT1G01770	gbM
AT1G01790	gbM
AT1G01820	gbM
AT1G01880	gbM
AT1G01910	gbM
AT1G01920	gbM
AT1G01930	gbM
AT1G01950	gbM
AT1G01960	gbM
AT1G01970	gbM
AT1G02010	gbM
AT1G02050	gbM
AT1G02080	gbM
AT1G02100	gbM
AT1G02110	gbM
AT1G02120	gbM
AT1G02145	gbM
AT1G02260	gbM
AT1G02270	gbM
AT1G02280	gbM
AT1G02290	gbM
AT1G02305	gbM
AT1G02330	gbM
AT1G02410	gbM
AT1G02420	gbM
AT1G02430	gbM
AT1G02500	gbM
AT1G02520	gbM
AT1G02530	gbM
AT1G02560	gbM
AT1G02660	gbM
AT1G02670	gbM
AT1G02690	gbM
AT1G02750	gbM
AT1G02840	gbM
AT1G02870	gbM
AT1G02890	gbM
AT1G02910	gbM
AT1G02960	gbM
AT1G02970	gbM
AT1G02990	gbM
AT1G03000	gbM
AT1G03030	gbM
AT1G03060	gbM
AT1G03090	gbM
AT1G03100	gbM
AT1G03110	gbM
AT1G03160	gbM
AT1G03180	gbM
AT1G03190	gbM
AT1G03210	gbM
AT1G03260	gbM
AT1G03270	gbM
AT1G03280	gbM
AT1G03290	gbM
AT1G03300	gbM
AT1G03310	gbM
AT1G03360	gbM
AT1G03365	gbM
AT1G03370	gbM
AT1G03380	gbM
AT1G03457	gbM
AT1G03475	gbM
AT1G03495	gbM
AT1G03510	gbM
AT1G03520	gbM
AT1G03530	gbM
AT1G03540	gbM
AT1G03550	gbM
AT1G03560	gbM
AT1G03687	gbM
AT1G03740	gbM
AT1G03750	gbM
AT1G03770	gbM
AT1G03830	gbM
AT1G03860	gbM
AT1G03900	gbM
AT1G03905	gbM
AT1G03910	gbM
AT1G03930	gbM
AT1G03940	gbM
AT1G03960	gbM
AT1G04010	gbM
AT1G04020	gbM
AT1G04030	gbM
AT1G04050	gbM
AT1G04080	gbM
AT1G04110	gbM
AT1G04120	gbM
AT1G04130	gbM
AT1G04140	gbM
AT1G04160	gbM
AT1G04170	gbM
AT1G04190	gbM
AT1G04200	gbM
AT1G04210	gbM
AT1G04230	gbM
AT1G04300	gbM
AT1G04310	gbM
AT1G04340	gbM
AT1G04370	gbM
AT1G04390	gbM
AT1G04400	gbM
AT1G04410	gbM
AT1G04420	gbM
AT1G04430	gbM
AT1G04440	gbM
AT1G04510	gbM
AT1G04590	gbM
AT1G04600	gbM
AT1G04620	gbM
AT1G04650	gbM
AT1G04700	gbM
AT1G04710	gbM
AT1G04730	gbM
AT1G04780	gbM
AT1G04790	gbM
AT1G04810	gbM
AT1G04830	gbM
AT1G04850	gbM
AT1G04860	gbM
AT1G04870	gbM
AT1G04900	gbM
AT1G04910	gbM
AT1G04920	gbM
AT1G04930	gbM
AT1G04940	gbM
AT1G04945	gbM
AT1G04950	gbM
AT1G04960	gbM
AT1G04985	gbM
AT1G05055	gbM
AT1G05060	gbM
AT1G05070	gbM
AT1G05087	gbM
AT1G05120	gbM
AT1G05150	gbM
AT1G05160	gbM
AT1G05180	gbM
AT1G05200	gbM
AT1G05270	gbM
AT1G05360	gbM
AT1G05380	gbM
AT1G05410	gbM
AT1G05460	gbM
AT1G05470	gbM
AT1G05490	gbM
AT1G05500	gbM
AT1G05520	gbM
AT1G05570	gbM
AT1G05600	gbM
AT1G05620	gbM
AT1G05630	gbM
AT1G05640	gbM
AT1G05670	gbM
AT1G05700	gbM
AT1G05720	gbM
AT1G05750	gbM
AT1G05760	gbM
AT1G05780	gbM
AT1G05790	gbM
AT1G05830	gbM
AT1G05840	gbM
AT1G05890	gbM
AT1G05894	gbM
AT1G05900	gbM
AT1G05910	gbM
AT1G05940	gbM
AT1G05950	gbM
AT1G05960	gbM
AT1G05990	gbM
AT1G06070	gbM
AT1G06090	gbM
AT1G06110	gbM
AT1G06130	gbM
AT1G06140	gbM
AT1G06143	gbM
AT1G06150	gbM
AT1G06210	gbM
AT1G06220	gbM
AT1G06230	gbM
AT1G06240	gbM
AT1G06250	gbM
AT1G06270	gbM
AT1G06290	gbM
AT1G06390	gbM
AT1G06410	gbM
AT1G06430	gbM
AT1G06470	gbM
AT1G06490	gbM
AT1G06500	gbM
AT1G06510	gbM
AT1G06550	gbM
AT1G06560	gbM
AT1G06580	gbM
AT1G06590	gbM
AT1G06630	gbM
AT1G06670	gbM
AT1G06690	gbM
AT1G06700	gbM
AT1G06710	gbM
AT1G06720	gbM
AT1G06730	gbM
AT1G06740	gbM
AT1G06750	gbM
AT1G06770	gbM
AT1G06780	gbM
AT1G06790	gbM
AT1G06820	gbM
AT1G06840	gbM
AT1G06890	gbM
AT1G06900	gbM
AT1G06910	gbM
AT1G06950	gbM
AT1G06960	gbM
AT1G07010	gbM
AT1G07040	gbM
AT1G07110	gbM
AT1G07120	gbM
AT1G07200	gbM
AT1G07220	gbM
AT1G07290	gbM
AT1G07330	gbM
AT1G07350	gbM
AT1G07360	gbM
AT1G07380	gbM
AT1G07390	gbM
AT1G07450	gbM
AT1G07470	gbM
AT1G07476	gbM
AT1G07480	gbM
AT1G07510	gbM
AT1G07520	gbM
AT1G07530	gbM
AT1G07560	gbM
AT1G07570	gbM
AT1G07590	gbM
AT1G07615	gbM
AT1G07650	gbM
AT1G07670	gbM
AT1G07705	gbM
AT1G07710	gbM
AT1G07730	gbM
AT1G07740	gbM
AT1G07745	gbM
AT1G07780	gbM
AT1G07810	gbM
AT1G07840	gbM
AT1G07870	gbM
AT1G07880	gbM
AT1G07910	gbM
AT1G07960	gbM
AT1G07970	gbM
AT1G07990	gbM
AT1G08000	gbM
AT1G08010	gbM
AT1G08030	gbM
AT1G08040	gbM
AT1G08060	gbM
AT1G08070	gbM
AT1G08110	gbM
AT1G08125	gbM
AT1G08130	gbM
AT1G08190	gbM
AT1G08200	gbM
AT1G08210	gbM
AT1G08220	gbM
AT1G08260	gbM
AT1G08280	gbM
AT1G08300	gbM
AT1G08310	gbM
AT1G08340	gbM
AT1G08350	gbM
AT1G08370	gbM
AT1G08400	gbM
AT1G08410	gbM
AT1G08420	gbM
AT1G08450	gbM
AT1G08490	gbM
AT1G08520	gbM
AT1G08540	gbM
AT1G08550	gbM
AT1G08590	gbM
AT1G08600	gbM
AT1G08610	gbM
AT1G08620	gbM
AT1G08640	gbM
AT1G08660	gbM
AT1G08680	gbM
AT1G08720	gbM
AT1G08730	gbM
AT1G08750	gbM
AT1G08760	gbM
AT1G08780	gbM
AT1G08800	gbM
AT1G08820	gbM
AT1G08830	gbM
AT1G08840	gbM
AT1G08845	gbM
AT1G08860	gbM
AT1G08910	gbM
AT1G08920	gbM
AT1G08960	gbM
AT1G08970	gbM
AT1G09010	gbM
AT1G09020	gbM
AT1G09040	gbM
AT1G09050	gbM
AT1G09060	gbM
AT1G09080	gbM
AT1G09100	gbM
AT1G09130	gbM
AT1G09140	gbM
AT1G09150	gbM
AT1G09160	gbM
AT1G09190	gbM
AT1G09195	gbM
AT1G09220	gbM
AT1G09230	gbM
AT1G09270	gbM
AT1G09280	gbM
AT1G09290	gbM
AT1G09300	gbM
AT1G09310	gbM
AT1G09320	gbM
AT1G09410	gbM
AT1G09430	gbM
AT1G09440	gbM
AT1G09450	gbM
AT1G09460	gbM
AT1G09470	gbM
AT1G09530	gbM
AT1G09570	gbM
AT1G09600	gbM
AT1G09610	gbM
AT1G09620	gbM
AT1G09640	gbM
AT1G09660	gbM
AT1G09680	gbM
AT1G09700	gbM
AT1G09710	gbM
AT1G09730	gbM
AT1G09760	gbM
AT1G09770	gbM
AT1G09795	gbM
AT1G09800	gbM
AT1G09810	gbM
AT1G09820	gbM
AT1G09830	gbM
AT1G09840	gbM
AT1G09850	gbM
AT1G09870	gbM
AT1G09900	gbM
AT1G09910	gbM
AT1G09920	gbM
AT1G09935	gbM
AT1G09940	gbM
AT1G09960	gbM
AT1G09980	gbM
AT1G10030	gbM
AT1G10040	gbM
AT1G10050	gbM
AT1G10090	gbM
AT1G10095	gbM
AT1G10130	gbM
AT1G10150	gbM
AT1G10155	gbM
AT1G10170	gbM
AT1G10180	gbM
AT1G10210	gbM
AT1G10240	gbM
AT1G10270	gbM
AT1G10290	gbM
AT1G10300	gbM
AT1G10320	gbM
AT1G10390	gbM
AT1G10410	gbM
AT1G10417	gbM
AT1G10430	gbM
AT1G10450	gbM
AT1G10490	gbM
AT1G10510	gbM
AT1G10520	gbM
AT1G10570	gbM
AT1G10600	gbM
AT1G10660	gbM
AT1G10670	gbM
AT1G10680	gbM
AT1G10700	gbM
AT1G10720	gbM
AT1G10730	gbM
AT1G10740	gbM
AT1G10760	gbM
AT1G10780	gbM
AT1G10810	gbM
AT1G10820	gbM
AT1G10840	gbM
AT1G10850	gbM
AT1G10865	gbM
AT1G10870	gbM
AT1G10890	gbM
AT1G10900	gbM
AT1G10910	gbM
AT1G10930	gbM
AT1G10940	gbM
AT1G10950	gbM
AT1G10970	gbM
AT1G11000	gbM
AT1G11020	gbM
AT1G11050	gbM
AT1G11060	gbM
AT1G11070	gbM
AT1G11100	gbM
AT1G11130	gbM
AT1G11160	gbM
AT1G11180	gbM
AT1G11200	gbM
AT1G11290	gbM
AT1G11300	gbM
AT1G11303	gbM
AT1G11310	gbM
AT1G11330	gbM
AT1G11340	gbM
AT1G11350	gbM
AT1G11380	gbM
AT1G11390	gbM
AT1G11400	gbM
AT1G11410	gbM
AT1G11420	gbM
AT1G11430	gbM
AT1G11480	gbM
AT1G11591	gbM
AT1G11608	gbM
AT1G11650	gbM
AT1G11660	gbM
AT1G11680	gbM
AT1G11720	gbM
AT1G11750	gbM
AT1G11755	gbM
AT1G11760	gbM
AT1G11780	gbM
AT1G11790	gbM
AT1G11800	gbM
AT1G11820	gbM
AT1G11860	gbM
AT1G11870	gbM
AT1G11880	gbM
AT1G11890	gbM
AT1G11900	gbM
AT1G11905	gbM
AT1G11910	gbM
AT1G11925	gbM
AT1G11930	gbM
AT1G11940	gbM
AT1G11950	gbM
AT1G11960	gbM
AT1G12000	gbM
AT1G12050	gbM
AT1G12120	gbM
AT1G12140	gbM
AT1G12150	gbM
AT1G12160	gbM
AT1G12210	gbM
AT1G12211	gbM
AT1G12220	gbM
AT1G12230	gbM
AT1G12270	gbM
AT1G12280	gbM
AT1G12290	gbM
AT1G12300	gbM
AT1G12350	gbM
AT1G12360	gbM
AT1G12370	gbM
AT1G12390	gbM
AT1G12410	gbM
AT1G12430	gbM
AT1G12460	gbM
AT1G12470	gbM
AT1G12480	gbM
AT1G12520	gbM
AT1G12530	gbM
AT1G12580	gbM
AT1G12620	gbM
AT1G12640	gbM
AT1G12650	gbM
AT1G12680	gbM
AT1G12700	gbM
AT1G12730	gbM
AT1G12750	gbM
AT1G12770	gbM
AT1G12775	gbM
AT1G12790	gbM
AT1G12800	gbM
AT1G12820	gbM
AT1G12840	gbM
AT1G12850	gbM
AT1G12930	gbM
AT1G12950	gbM
AT1G12990	gbM
AT1G13000	gbM
AT1G13020	gbM
AT1G13030	gbM
AT1G13040	gbM
AT1G13050	gbM
AT1G13060	gbM
AT1G13120	gbM
AT1G13140	gbM
AT1G13143	gbM
AT1G13150	gbM
AT1G13160	gbM
AT1G13170	gbM
AT1G13180	gbM
AT1G13190	gbM
AT1G13195	gbM
AT1G13210	gbM
AT1G13220	gbM
AT1G13270	gbM
AT1G13310	gbM
AT1G13320	gbM
AT1G13330	gbM
AT1G13340	gbM
AT1G13350	gbM
AT1G13410	gbM
AT1G13450	gbM
AT1G13460	gbM
AT1G13480	gbM
AT1G13490	gbM
AT1G13540	gbM
AT1G13550	gbM
AT1G13560	gbM
AT1G13580	gbM
AT1G13630	gbM
AT1G13640	gbM
AT1G13700	gbM
AT1G13730	gbM
AT1G13770	gbM
AT1G13780	gbM
AT1G13790	gbM
AT1G13800	gbM
AT1G13805	gbM
AT1G13810	gbM
AT1G13820	gbM
AT1G13860	gbM
AT1G13880	gbM
AT1G13900	gbM
AT1G13910	gbM
AT1G13940	gbM
AT1G13960	gbM
AT1G13970	gbM
AT1G13980	gbM
AT1G14000	gbM
AT1G14010	gbM
AT1G14030	gbM
AT1G14040	gbM
AT1G14080	gbM
AT1G14140	gbM
AT1G14170	gbM
AT1G14180	gbM
AT1G14190	gbM
AT1G14205	gbM
AT1G14210	gbM
AT1G14230	gbM
AT1G14260	gbM
AT1G14270	gbM
AT1G14280	gbM
AT1G14290	gbM
AT1G14300	gbM
AT1G14310	gbM
AT1G14340	gbM
AT1G14370	gbM
AT1G14380	gbM
AT1G14390	gbM
AT1G14400	gbM
AT1G14460	gbM
AT1G14470	gbM
AT1G14480	gbM
AT1G14500	gbM
AT1G14510	gbM
AT1G14530	gbM
AT1G14560	gbM
AT1G14570	gbM
AT1G14590	gbM
AT1G14610	gbM
AT1G14620	gbM
AT1G14640	gbM
AT1G14650	gbM
AT1G14660	gbM
AT1G14670	gbM
AT1G14685	gbM
AT1G14688	gbM
AT1G14690	gbM
AT1G14710	gbM
AT1G14740	gbM
AT1G14770	gbM
AT1G14790	gbM
AT1G14810	gbM
AT1G14830	gbM
AT1G14840	gbM
AT1G14850	gbM
AT1G14910	gbM
AT1G14970	gbM
AT1G15020	gbM
AT1G15030	gbM
AT1G15040	gbM
AT1G15050	gbM
AT1G15060	gbM
AT1G15110	gbM
AT1G15125	gbM
AT1G15130	gbM
AT1G15150	gbM
AT1G15160	gbM
AT1G15165	gbM
AT1G15170	gbM
AT1G15180	gbM
AT1G15215	gbM
AT1G15240	gbM
AT1G15280	gbM
AT1G15290	gbM
AT1G15340	gbM
AT1G15410	gbM
AT1G15430	gbM
AT1G15440	gbM
AT1G15460	gbM
AT1G15470	gbM
AT1G15480	gbM
AT1G15490	gbM
AT1G15500	gbM
AT1G15510	gbM
AT1G15570	gbM
AT1G15660	gbM
AT1G15740	gbM
AT1G15750	gbM
AT1G15780	gbM
AT1G15880	gbM
AT1G15890	gbM
AT1G15910	gbM
AT1G15940	gbM
AT1G15970	gbM
AT1G15980	gbM
AT1G16010	gbM
AT1G16020	gbM
AT1G16070	gbM
AT1G16080	gbM
AT1G16090	gbM
AT1G16110	gbM
AT1G16130	gbM
AT1G16160	gbM
AT1G16180	gbM
AT1G16190	gbM
AT1G16220	gbM
AT1G16225	gbM
AT1G16250	gbM
AT1G16260	gbM
AT1G16270	gbM
AT1G16280	gbM
AT1G16300	gbM
AT1G16340	gbM
AT1G16350	gbM
AT1G16460	gbM
AT1G16470	gbM
AT1G16480	gbM
AT1G16520	gbM
AT1G16540	gbM
AT1G16560	gbM
AT1G16570	gbM
AT1G16610	gbM
AT1G16650	gbM
AT1G16670	gbM
AT1G16680	gbM
AT1G16690	gbM
AT1G16700	gbM
AT1G16710	gbM
AT1G16720	gbM
AT1G16750	gbM
AT1G16780	gbM
AT1G16800	gbM
AT1G16810	gbM
AT1G16825	gbM
AT1G16830	gbM
AT1G16860	gbM
AT1G16870	gbM
AT1G16900	gbM
AT1G16960	gbM
AT1G16970	gbM
AT1G17000	gbM
AT1G17040	gbM
AT1G17070	gbM
AT1G17110	gbM
AT1G17130	gbM
AT1G17145	gbM
AT1G17210	gbM
AT1G17220	gbM
AT1G17230	gbM
AT1G17250	gbM
AT1G17260	gbM
AT1G17270	gbM
AT1G17280	gbM
AT1G17290	gbM
AT1G17340	gbM
AT1G17350	gbM
AT1G17360	gbM
AT1G17370	gbM
AT1G17410	gbM
AT1G17440	gbM
AT1G17450	gbM
AT1G17460	gbM
AT1G17470	gbM
AT1G17480	gbM
AT1G17500	gbM
AT1G17520	gbM
AT1G17540	gbM
AT1G17550	gbM
AT1G17580	gbM
AT1G17600	gbM
AT1G17610	gbM
AT1G17630	gbM
AT1G17640	gbM
AT1G17650	gbM
AT1G17680	gbM
AT1G17690	gbM
AT1G17720	gbM
AT1G17750	gbM
AT1G17760	gbM
AT1G17820	gbM
AT1G17840	gbM
AT1G17850	gbM
AT1G17870	gbM
AT1G17890	gbM
AT1G17920	gbM
AT1G17930	gbM
AT1G17940	gbM
AT1G17970	gbM
AT1G17980	gbM
AT1G18030	gbM
AT1G18040	gbM
AT1G18070	gbM
AT1G18090	gbM
AT1G18150	gbM
AT1G18160	gbM
AT1G18180	gbM
AT1G18190	gbM
AT1G18260	gbM
AT1G18270	gbM
AT1G18335	gbM
AT1G18340	gbM
AT1G18370	gbM
AT1G18450	gbM
AT1G18460	gbM
AT1G18470	gbM
AT1G18480	gbM
AT1G18485	gbM
AT1G18500	gbM
AT1G18550	gbM
AT1G18560	gbM
AT1G18580	gbM
AT1G18600	gbM
AT1G18610	gbM
AT1G18620	gbM
AT1G18630	gbM
AT1G18640	gbM
AT1G18660	gbM
AT1G18670	gbM
AT1G18690	gbM
AT1G18700	gbM
AT1G18830	gbM
AT1G18840	gbM
AT1G18850	gbM
AT1G18870	gbM
AT1G18880	gbM
AT1G18890	gbM
AT1G18900	gbM
AT1G18910	gbM
AT1G18950	gbM
AT1G18990	gbM
AT1G19010	gbM
AT1G19025	gbM
AT1G19080	gbM
AT1G19100	gbM
AT1G19110	gbM
AT1G19115	gbM
AT1G19140	gbM
AT1G19170	gbM
AT1G19220	gbM
AT1G19230	gbM
AT1G19240	gbM
AT1G19270	gbM
AT1G19290	gbM
AT1G19310	gbM
AT1G19350	gbM
AT1G19360	gbM
AT1G19370	gbM
AT1G19396	gbM
AT1G19397	gbM
AT1G19430	gbM
AT1G19440	gbM
AT1G19450	gbM
AT1G19485	gbM
AT1G19490	gbM
AT1G19520	gbM
AT1G19580	gbM
AT1G19600	gbM
AT1G19650	gbM
AT1G19680	gbM
AT1G19700	gbM
AT1G19715	gbM
AT1G19720	gbM
AT1G19750	gbM
AT1G19780	gbM
AT1G19800	gbM
AT1G19835	gbM
AT1G19850	gbM
AT1G19860	gbM
AT1G19870	gbM
AT1G19880	gbM
AT1G19920	gbM
AT1G19930	gbM
AT1G19980	gbM
AT1G19990	gbM
AT1G20000	gbM
AT1G20010	gbM
AT1G20050	gbM
AT1G20060	gbM
AT1G20090	gbM
AT1G20110	gbM
AT1G20120	gbM
AT1G20160	gbM
AT1G20200	gbM
AT1G20220	gbM
AT1G20225	gbM
AT1G20230	gbM
AT1G20260	gbM
AT1G20270	gbM
AT1G20300	gbM
AT1G20370	gbM
AT1G20380	gbM
AT1G20410	gbM
AT1G20460	gbM
AT1G20470	gbM
AT1G20520	gbM
AT1G20540	gbM
AT1G20550	gbM
AT1G20560	gbM
AT1G20570	gbM
AT1G20575	gbM
AT1G20580	gbM
AT1G20590	gbM
AT1G20610	gbM
AT1G20630	gbM
AT1G20640	gbM
AT1G20650	gbM
AT1G20670	gbM
AT1G20690	gbM
AT1G20720	gbM
AT1G20750	gbM
AT1G20760	gbM
AT1G20770	gbM
AT1G20780	gbM
AT1G20830	gbM
AT1G20840	gbM
AT1G20870	gbM
AT1G20880	gbM
AT1G20890	gbM
AT1G20910	gbM
AT1G20920	gbM
AT1G20925	gbM
AT1G20930	gbM
AT1G20950	gbM
AT1G20960	gbM
AT1G20970	gbM
AT1G20980	gbM
AT1G21060	gbM
AT1G21070	gbM
AT1G21080	gbM
AT1G21100	gbM
AT1G21110	gbM
AT1G21120	gbM
AT1G21150	gbM
AT1G21160	gbM
AT1G21170	gbM
AT1G21200	gbM
AT1G21210	gbM
AT1G21240	gbM
AT1G21250	gbM
AT1G21270	gbM
AT1G21340	gbM
AT1G21350	gbM
AT1G21370	gbM
AT1G21380	gbM
AT1G21410	gbM
AT1G21440	gbM
AT1G21450	gbM
AT1G21480	gbM
AT1G21560	gbM
AT1G21580	gbM
AT1G21590	gbM
AT1G21610	gbM
AT1G21630	gbM
AT1G21640	gbM
AT1G21650	gbM
AT1G21651	gbM
AT1G21660	gbM
AT1G21690	gbM
AT1G21700	gbM
AT1G21720	gbM
AT1G21730	gbM
AT1G21740	gbM
AT1G21750	gbM
AT1G21760	gbM
AT1G21780	gbM
AT1G21790	gbM
AT1G21810	gbM
AT1G21850	gbM
AT1G21870	gbM
AT1G21880	gbM
AT1G21890	gbM
AT1G21900	gbM
AT1G21930	gbM
AT1G21980	gbM
AT1G22020	gbM
AT1G22040	gbM
AT1G22060	gbM
AT1G22070	gbM
AT1G22100	gbM
AT1G22150	gbM
AT1G22170	gbM
AT1G22200	gbM
AT1G22240	gbM
AT1G22250	gbM
AT1G22275	gbM
AT1G22290	gbM
AT1G22300	gbM
AT1G22310	gbM
AT1G22450	gbM
AT1G22460	gbM
AT1G22510	gbM
AT1G22540	gbM
AT1G22620	gbM
AT1G22660	gbM
AT1G22670	gbM
AT1G22730	gbM
AT1G22750	gbM
AT1G22770	gbM
AT1G22790	gbM
AT1G22800	gbM
AT1G22830	gbM
AT1G22850	gbM
AT1G22860	gbM
AT1G22870	gbM
AT1G22880	gbM
AT1G22920	gbM
AT1G22930	gbM
AT1G22940	gbM
AT1G22950	gbM
AT1G22960	gbM
AT1G22970	gbM
AT1G23030	gbM
AT1G23070	gbM
AT1G23170	gbM
AT1G23180	gbM
AT1G23190	gbM
AT1G23230	gbM
AT1G23260	gbM
AT1G23280	gbM
AT1G23310	gbM
AT1G23330	gbM
AT1G23360	gbM
AT1G23400	gbM
AT1G23440	gbM
AT1G23450	gbM
AT1G23460	gbM
AT1G23465	gbM
AT1G23480	gbM
AT1G23590	gbM
AT1G23690	gbM
AT1G23740	gbM
AT1G23780	gbM
AT1G23790	gbM
AT1G23800	gbM
AT1G23820	gbM
AT1G23860	gbM
AT1G23870	gbM
AT1G23880	gbM
AT1G23890	gbM
AT1G23900	gbM
AT1G23950	gbM
AT1G24030	gbM
AT1G24040	gbM
AT1G24050	gbM
AT1G24090	gbM
AT1G24095	gbM
AT1G24100	gbM
AT1G24120	gbM
AT1G24160	gbM
AT1G24180	gbM
AT1G24190	gbM
AT1G24220	gbM
AT1G24230	gbM
AT1G24240	gbM
AT1G24256	gbM
AT1G24265	gbM
AT1G24267	gbM
AT1G24280	gbM
AT1G24290	gbM
AT1G24300	gbM
AT1G24310	gbM
AT1G24320	gbM
AT1G24330	gbM
AT1G24340	gbM
AT1G24350	gbM
AT1G24360	gbM
AT1G24430	gbM
AT1G24440	gbM
AT1G24460	gbM
AT1G24490	gbM
AT1G24510	gbM
AT1G24540	gbM
AT1G24560	gbM
AT1G24570	gbM
AT1G24610	gbM
AT1G24706	gbM
AT1G24764	gbM
AT1G25270	gbM
AT1G25280	gbM
AT1G25320	gbM
AT1G25350	gbM
AT1G25360	gbM
AT1G25375	gbM
AT1G25380	gbM
AT1G25390	gbM
AT1G25420	gbM
AT1G25490	gbM
AT1G25500	gbM
AT1G25540	gbM
AT1G25570	gbM
AT1G25580	gbM
AT1G25682	gbM
AT1G26110	gbM
AT1G26130	gbM
AT1G26150	gbM
AT1G26160	gbM
AT1G26170	gbM
AT1G26180	gbM
AT1G26190	gbM
AT1G26230	gbM
AT1G26255	gbM
AT1G26260	gbM
AT1G26270	gbM
AT1G26290	gbM
AT1G26300	gbM
AT1G26330	gbM
AT1G26370	gbM
AT1G26390	gbM
AT1G26410	gbM
AT1G26440	gbM
AT1G26460	gbM
AT1G26520	gbM
AT1G26530	gbM
AT1G26540	gbM
AT1G26550	gbM
AT1G26610	gbM
AT1G26620	gbM
AT1G26640	gbM
AT1G26650	gbM
AT1G26660	gbM
AT1G26665	gbM
AT1G26670	gbM
AT1G26680	gbM
AT1G26690	gbM
AT1G26710	gbM
AT1G26730	gbM
AT1G26740	gbM
AT1G26750	gbM
AT1G26760	gbM
AT1G26761	gbM
AT1G26810	gbM
AT1G26830	gbM
AT1G26850	gbM
AT1G26900	gbM
AT1G26940	gbM
AT1G27000	gbM
AT1G27008	gbM
AT1G27070	gbM
AT1G27120	gbM
AT1G27150	gbM
AT1G27180	gbM
AT1G27190	gbM
AT1G27260	gbM
AT1G27270	gbM
AT1G27320	gbM
AT1G27340	gbM
AT1G27360	gbM
AT1G27370	gbM
AT1G27385	gbM
AT1G27390	gbM
AT1G27410	gbM
AT1G27420	gbM
AT1G27430	gbM
AT1G27440	gbM
AT1G27450	gbM
AT1G27470	gbM
AT1G27480	gbM
AT1G27500	gbM
AT1G27510	gbM
AT1G27520	gbM
AT1G27595	gbM
AT1G27630	gbM
AT1G27650	gbM
AT1G27680	gbM
AT1G27690	gbM
AT1G27700	gbM
AT1G27720	gbM
AT1G27750	gbM
AT1G27752	gbM
AT1G27770	gbM
AT1G27840	gbM
AT1G27850	gbM
AT1G27880	gbM
AT1G27900	gbM
AT1G27910	gbM
AT1G27920	gbM
AT1G27940	gbM
AT1G27960	gbM
AT1G28005	gbM
AT1G28010	gbM
AT1G28020	gbM
AT1G28040	gbM
AT1G28060	gbM
AT1G28090	gbM
AT1G28100	gbM
AT1G28110	gbM
AT1G28120	gbM
AT1G28180	gbM
AT1G28210	gbM
AT1G28220	gbM
AT1G28240	gbM
AT1G28260	gbM
AT1G28320	gbM
AT1G28340	gbM
AT1G28350	gbM
AT1G28380	gbM
AT1G28410	gbM
AT1G28420	gbM
AT1G28440	gbM
AT1G28460	gbM
AT1G28490	gbM
AT1G28510	gbM
AT1G28520	gbM
AT1G28530	gbM
AT1G28540	gbM
AT1G28550	gbM
AT1G28560	gbM
AT1G28680	gbM
AT1G28690	gbM
AT1G28700	gbM
AT1G28710	gbM
AT1G28760	gbM
AT1G28960	gbM
AT1G29000	gbM
AT1G29010	gbM
AT1G29025	gbM
AT1G29030	gbM
AT1G29060	gbM
AT1G29120	gbM
AT1G29150	gbM
AT1G29170	gbM
AT1G29179	gbM
AT1G29180	gbM
AT1G29200	gbM
AT1G29220	gbM
AT1G29230	gbM
AT1G29240	gbM
AT1G29310	gbM
AT1G29320	gbM
AT1G29330	gbM
AT1G29340	gbM
AT1G29350	gbM
AT1G29370	gbM
AT1G29380	gbM
AT1G29400	gbM
AT1G29410	gbM
AT1G29435	gbM
AT1G29440	gbM
AT1G29450	gbM
AT1G29460	gbM
AT1G29470	gbM
AT1G29480	gbM
AT1G29490	gbM
AT1G29510	gbM
AT1G29520	gbM
AT1G29535	gbM
AT1G29540	gbM
AT1G29560	gbM
AT1G29630	gbM
AT1G29690	gbM
AT1G29700	gbM
AT1G29710	gbM
AT1G29730	gbM
AT1G29740	gbM
AT1G29750	gbM
AT1G29760	gbM
AT1G29770	gbM
AT1G29775	gbM
AT1G29780	gbM
AT1G29800	gbM
AT1G29810	gbM
AT1G29820	gbM
AT1G29840	gbM
AT1G29850	gbM
AT1G29880	gbM
AT1G29890	gbM
AT1G29900	gbM
AT1G29940	gbM
AT1G29950	gbM
AT1G29970	gbM
AT1G30000	gbM
AT1G30010	gbM
AT1G30090	gbM
AT1G30130	gbM
AT1G30200	gbM
AT1G30230	gbM
AT1G30240	gbM
AT1G30270	gbM
AT1G30290	gbM
AT1G30320	gbM
AT1G30330	gbM
AT1G30360	gbM
AT1G30370	gbM
AT1G30400	gbM
AT1G30410	gbM
AT1G30420	gbM
AT1G30440	gbM
AT1G30450	gbM
AT1G30460	gbM
AT1G30470	gbM
AT1G30473	gbM
AT1G30475	gbM
AT1G30480	gbM
AT1G30490	gbM
AT1G30510	gbM
AT1G30520	gbM
AT1G30540	gbM
AT1G30545	gbM
AT1G30560	gbM
AT1G30570	gbM
AT1G30580	gbM
AT1G30590	gbM
AT1G30600	gbM
AT1G30610	gbM
AT1G30620	gbM
AT1G30630	gbM
AT1G30640	gbM
AT1G30680	gbM
AT1G30690	gbM
AT1G30755	gbM
AT1G30760	gbM
AT1G30810	gbM
AT1G30820	gbM
AT1G30825	gbM
AT1G30845	gbM
AT1G30870	gbM
AT1G30890	gbM
AT1G30910	gbM
AT1G30960	gbM
AT1G30970	gbM
AT1G31000	gbM
AT1G31010	gbM
AT1G31080	gbM
AT1G31120	gbM
AT1G31150	gbM
AT1G31175	gbM
AT1G31180	gbM
AT1G31190	gbM
AT1G31220	gbM
AT1G31230	gbM
AT1G31280	gbM
AT1G31300	gbM
AT1G31340	gbM
AT1G31360	gbM
AT1G31410	gbM
AT1G31420	gbM
AT1G31430	gbM
AT1G31440	gbM
AT1G31460	gbM
AT1G31470	gbM
AT1G31480	gbM
AT1G31490	gbM
AT1G31500	gbM
AT1G31555	gbM
AT1G31600	gbM
AT1G31620	gbM
AT1G31650	gbM
AT1G31660	gbM
AT1G31730	gbM
AT1G31770	gbM
AT1G31780	gbM
AT1G31800	gbM
AT1G31810	gbM
AT1G31814	gbM
AT1G31817	gbM
AT1G31830	gbM
AT1G31840	gbM
AT1G31850	gbM
AT1G31860	gbM
AT1G31870	gbM
AT1G31910	gbM
AT1G31920	gbM
AT1G31930	gbM
AT1G31970	gbM
AT1G32030	gbM
AT1G32050	gbM
AT1G32060	gbM
AT1G32080	gbM
AT1G32090	gbM
AT1G32120	gbM
AT1G32127	gbM
AT1G32130	gbM
AT1G32150	gbM
AT1G32160	gbM
AT1G32180	gbM
AT1G32200	gbM
AT1G32230	gbM
AT1G32250	gbM
AT1G32260	gbM
AT1G32300	gbM
AT1G32330	gbM
AT1G32340	gbM
AT1G32360	gbM
AT1G32361	gbM
AT1G32375	gbM
AT1G32380	gbM
AT1G32400	gbM
AT1G32410	gbM
AT1G32415	gbM
AT1G32420	gbM
AT1G32440	gbM
AT1G32450	gbM
AT1G32460	gbM
AT1G32470	gbM
AT1G32490	gbM
AT1G32500	gbM
AT1G32510	gbM
AT1G32520	gbM
AT1G32530	gbM
AT1G32550	gbM
AT1G32575	gbM
AT1G32585	gbM
AT1G32610	gbM
AT1G32660	gbM
AT1G32730	gbM
AT1G32750	gbM
AT1G32790	gbM
AT1G32810	gbM
AT1G32850	gbM
AT1G32870	gbM
AT1G32880	gbM
AT1G32900	gbM
AT1G32930	gbM
AT1G32940	gbM
AT1G32950	gbM
AT1G32960	gbM
AT1G32970	gbM
AT1G32980	gbM
AT1G33030	gbM
AT1G33050	gbM
AT1G33060	gbM
AT1G33230	gbM
AT1G33250	gbM
AT1G33290	gbM
AT1G33340	gbM
AT1G33350	gbM
AT1G33360	gbM
AT1G33390	gbM
AT1G33400	gbM
AT1G33410	gbM
AT1G33430	gbM
AT1G33470	gbM
AT1G33480	gbM
AT1G33490	gbM
AT1G33680	gbM
AT1G33700	gbM
AT1G33770	gbM
AT1G33780	gbM
AT1G33790	gbM
AT1G33810	gbM
AT1G33850	gbM
AT1G33890	gbM
AT1G33920	gbM
AT1G33980	gbM
AT1G33990	gbM
AT1G34020	gbM
AT1G34040	gbM
AT1G34060	gbM
AT1G34065	gbM
AT1G34110	gbM
AT1G34120	gbM
AT1G34130	gbM
AT1G34140	gbM
AT1G34150	gbM
AT1G34160	gbM
AT1G34180	gbM
AT1G34190	gbM
AT1G34210	gbM
AT1G34220	gbM
AT1G34260	gbM
AT1G34270	gbM
AT1G34300	gbM
AT1G34320	gbM
AT1G34340	gbM
AT1G34350	gbM
AT1G34355	gbM
AT1G34360	gbM
AT1G34370	gbM
AT1G34380	gbM
AT1G34420	gbM
AT1G34430	gbM
AT1G34470	gbM
AT1G34570	gbM
AT1G34630	gbM
AT1G34640	gbM
AT1G34650	gbM
AT1G34760	gbM
AT1G34770	gbM
AT1G34780	gbM
AT1G35160	gbM
AT1G35183	gbM
AT1G35190	gbM
AT1G35220	gbM
AT1G35310	gbM
AT1G35330	gbM
AT1G35340	gbM
AT1G35350	gbM
AT1G35353	gbM
AT1G35460	gbM
AT1G35470	gbM
AT1G35510	gbM
AT1G35530	gbM
AT1G35580	gbM
AT1G35620	gbM
AT1G35630	gbM
AT1G35660	gbM
AT1G35750	gbM
AT1G35880	gbM
AT1G35890	gbM
AT1G36050	gbM
AT1G36070	gbM
AT1G36160	gbM
AT1G36280	gbM
AT1G36310	gbM
AT1G36320	gbM
AT1G36370	gbM
AT1G36390	gbM
AT1G36730	gbM
AT1G36980	gbM
AT1G36990	gbM
AT1G37150	gbM
AT1G42430	gbM
AT1G42440	gbM
AT1G42470	gbM
AT1G42480	gbM
AT1G42540	gbM
AT1G42550	gbM
AT1G42960	gbM
AT1G42970	gbM
AT1G43130	gbM
AT1G43171	gbM
AT1G43190	gbM
AT1G43245	gbM
AT1G43580	gbM
AT1G43620	gbM
AT1G43650	gbM
AT1G43690	gbM
AT1G43700	gbM
AT1G43710	gbM
AT1G43850	gbM
AT1G43860	gbM
AT1G43890	gbM
AT1G43900	gbM
AT1G43910	gbM
AT1G43980	gbM
AT1G44000	gbM
AT1G44120	gbM
AT1G44224	gbM
AT1G44446	gbM
AT1G44608	gbM
AT1G44750	gbM
AT1G44770	gbM
AT1G44780	gbM
AT1G44790	gbM
AT1G44800	gbM
AT1G44820	gbM
AT1G44835	gbM
AT1G44900	gbM
AT1G44910	gbM
AT1G44940	gbM
AT1G44941	gbM
AT1G44960	gbM
AT1G45000	gbM
AT1G45050	gbM
AT1G45110	gbM
AT1G45130	gbM
AT1G45150	gbM
AT1G45160	gbM
AT1G45180	gbM
AT1G45207	gbM
AT1G45229	gbM
AT1G45230	gbM
AT1G45231	gbM
AT1G45233	gbM
AT1G45248	gbM
AT1G45249	gbM
AT1G45332	gbM
AT1G45474	gbM
AT1G45545	gbM
AT1G45616	gbM
AT1G45976	gbM
AT1G46912	gbM
AT1G47056	gbM
AT1G47210	gbM
AT1G47230	gbM
AT1G47240	gbM
AT1G47250	gbM
AT1G47260	gbM
AT1G47270	gbM
AT1G47278	gbM
AT1G47290	gbM
AT1G47317	gbM
AT1G47330	gbM
AT1G47340	gbM
AT1G47380	gbM
AT1G47420	gbM
AT1G47490	gbM
AT1G47530	gbM
AT1G47550	gbM
AT1G47560	gbM
AT1G47570	gbM
AT1G47578	gbM
AT1G47580	gbM
AT1G47640	gbM
AT1G47670	gbM
AT1G47710	gbM
AT1G47740	gbM
AT1G47780	gbM
AT1G47830	gbM
AT1G47870	gbM
AT1G47890	gbM
AT1G47900	gbM
AT1G48030	gbM
AT1G48040	gbM
AT1G48060	gbM
AT1G48090	gbM
AT1G48110	gbM
AT1G48120	gbM
AT1G48140	gbM
AT1G48160	gbM
AT1G48175	gbM
AT1G48200	gbM
AT1G48210	gbM
AT1G48220	gbM
AT1G48230	gbM
AT1G48240	gbM
AT1G48270	gbM
AT1G48310	gbM
AT1G48355	gbM
AT1G48360	gbM
AT1G48370	gbM
AT1G48380	gbM
AT1G48390	gbM
AT1G48410	gbM
AT1G48420	gbM
AT1G48430	gbM
AT1G48440	gbM
AT1G48490	gbM
AT1G48520	gbM
AT1G48540	gbM
AT1G48550	gbM
AT1G48560	gbM
AT1G48570	gbM
AT1G48580	gbM
AT1G48600	gbM
AT1G48635	gbM
AT1G48640	gbM
AT1G48650	gbM
AT1G48740	gbM
AT1G48760	gbM
AT1G48770	gbM
AT1G48780	gbM
AT1G48790	gbM
AT1G48840	gbM
AT1G48850	gbM
AT1G48860	gbM
AT1G48880	gbM
AT1G48900	gbM
AT1G48930	gbM
AT1G48950	gbM
AT1G48970	gbM
AT1G49015	gbM
AT1G49040	gbM
AT1G49050	gbM
AT1G49100	gbM
AT1G49130	gbM
AT1G49160	gbM
AT1G49170	gbM
AT1G49180	gbM
AT1G49205	gbM
AT1G49210	gbM
AT1G49220	gbM
AT1G49230	gbM
AT1G49240	gbM
AT1G49300	gbM
AT1G49340	gbM
AT1G49350	gbM
AT1G49360	gbM
AT1G49380	gbM
AT1G49390	gbM
AT1G49410	gbM
AT1G49480	gbM
AT1G49510	gbM
AT1G49530	gbM
AT1G49540	gbM
AT1G49580	gbM
AT1G49590	gbM
AT1G49600	gbM
AT1G49630	gbM
AT1G49710	gbM
AT1G49730	gbM
AT1G49740	gbM
AT1G49760	gbM
AT1G49810	gbM
AT1G49820	gbM
AT1G49880	gbM
AT1G49890	gbM
AT1G49910	gbM
AT1G49920	gbM
AT1G49940	gbM
AT1G49950	gbM
AT1G49960	gbM
AT1G49970	gbM
AT1G49980	gbM
AT1G50000	gbM
AT1G50010	gbM
AT1G50030	gbM
AT1G50090	gbM
AT1G50110	gbM
AT1G50120	gbM
AT1G50140	gbM
AT1G50170	gbM
AT1G50180	gbM
AT1G50190	gbM
AT1G50200	gbM
AT1G50240	gbM
AT1G50260	gbM
AT1G50270	gbM
AT1G50280	gbM
AT1G50300	gbM
AT1G50360	gbM
AT1G50370	gbM
AT1G50380	gbM
AT1G50400	gbM
AT1G50410	gbM
AT1G50430	gbM
AT1G50440	gbM
AT1G50450	gbM
AT1G50460	gbM
AT1G50480	gbM
AT1G50500	gbM
AT1G50510	gbM
AT1G50520	gbM
AT1G50570	gbM
AT1G50575	gbM
AT1G50580	gbM
AT1G50590	gbM
AT1G50600	gbM
AT1G50610	gbM
AT1G50620	gbM
AT1G50660	gbM
AT1G50670	gbM
AT1G50700	gbM
AT1G50710	gbM
AT1G50720	gbM
AT1G50730	gbM
AT1G50740	gbM
AT1G50745	gbM
AT1G50750	gbM
AT1G50770	gbM
AT1G50820	gbM
AT1G50840	gbM
AT1G50890	gbM
AT1G50900	gbM
AT1G50910	gbM
AT1G50920	gbM
AT1G50940	gbM
AT1G50950	gbM
AT1G50970	gbM
AT1G50990	gbM
AT1G51055	gbM
AT1G51110	gbM
AT1G51120	gbM
AT1G51130	gbM
AT1G51160	gbM
AT1G51200	gbM
AT1G51260	gbM
AT1G51310	gbM
AT1G51340	gbM
AT1G51350	gbM
AT1G51370	gbM
AT1G51380	gbM
AT1G51400	gbM
AT1G51405	gbM
AT1G51440	gbM
AT1G51450	gbM
AT1G51460	gbM
AT1G51510	gbM
AT1G51520	gbM
AT1G51540	gbM
AT1G51550	gbM
AT1G51570	gbM
AT1G51580	gbM
AT1G51590	gbM
AT1G51600	gbM
AT1G51610	gbM
AT1G51620	gbM
AT1G51630	gbM
AT1G51640	gbM
AT1G51670	gbM
AT1G51690	gbM
AT1G51710	gbM
AT1G51720	gbM
AT1G51730	gbM
AT1G51745	gbM
AT1G51760	gbM
AT1G51780	gbM
AT1G51790	gbM
AT1G51800	gbM
AT1G51805	gbM
AT1G51810	gbM
AT1G51890	gbM
AT1G51910	gbM
AT1G51940	gbM
AT1G51960	gbM
AT1G51965	gbM
AT1G51980	gbM
AT1G52040	gbM
AT1G52080	gbM
AT1G52150	gbM
AT1G52155	gbM
AT1G52160	gbM
AT1G52240	gbM
AT1G52260	gbM
AT1G52310	gbM
AT1G52315	gbM
AT1G52320	gbM
AT1G52340	gbM
AT1G52360	gbM
AT1G52370	gbM
AT1G52380	gbM
AT1G52410	gbM
AT1G52415	gbM
AT1G52420	gbM
AT1G52430	gbM
AT1G52450	gbM
AT1G52500	gbM
AT1G52510	gbM
AT1G52520	gbM
AT1G52530	gbM
AT1G52540	gbM
AT1G52570	gbM
AT1G52580	gbM
AT1G52590	gbM
AT1G52600	gbM
AT1G52620	gbM
AT1G52630	gbM
AT1G52640	gbM
AT1G52660	gbM
AT1G52670	gbM
AT1G52730	gbM
AT1G52750	gbM
AT1G52780	gbM
AT1G52790	gbM
AT1G52810	gbM
AT1G52820	gbM
AT1G52870	gbM
AT1G52910	gbM
AT1G52920	gbM
AT1G52980	gbM
AT1G53025	gbM
AT1G53040	gbM
AT1G53050	gbM
AT1G53090	gbM
AT1G53120	gbM
AT1G53140	gbM
AT1G53165	gbM
AT1G53190	gbM
AT1G53200	gbM
AT1G53210	gbM
AT1G53240	gbM
AT1G53270	gbM
AT1G53280	gbM
AT1G53290	gbM
AT1G53300	gbM
AT1G53310	gbM
AT1G53320	gbM
AT1G53330	gbM
AT1G53340	gbM
AT1G53350	gbM
AT1G53380	gbM
AT1G53390	gbM
AT1G53400	gbM
AT1G53430	gbM
AT1G53440	gbM
AT1G53450	gbM
AT1G53460	gbM
AT1G53470	gbM
AT1G53500	gbM
AT1G53510	gbM
AT1G53570	gbM
AT1G53590	gbM
AT1G53600	gbM
AT1G53645	gbM
AT1G53650	gbM
AT1G53680	gbM
AT1G53705	gbM
AT1G53710	gbM
AT1G53720	gbM
AT1G53730	gbM
AT1G53750	gbM
AT1G53770	gbM
AT1G53780	gbM
AT1G53800	gbM
AT1G53840	gbM
AT1G53850	gbM
AT1G53910	gbM
AT1G54060	gbM
AT1G54080	gbM
AT1G54090	gbM
AT1G54110	gbM
AT1G54115	gbM
AT1G54130	gbM
AT1G54140	gbM
AT1G54150	gbM
AT1G54160	gbM
AT1G54170	gbM
AT1G54180	gbM
AT1G54220	gbM
AT1G54260	gbM
AT1G54270	gbM
AT1G54280	gbM
AT1G54310	gbM
AT1G54320	gbM
AT1G54340	gbM
AT1G54350	gbM
AT1G54370	gbM
AT1G54380	gbM
AT1G54385	gbM
AT1G54390	gbM
AT1G54440	gbM
AT1G54450	gbM
AT1G54460	gbM
AT1G54470	gbM
AT1G54490	gbM
AT1G54510	gbM
AT1G54520	gbM
AT1G54530	gbM
AT1G54540	gbM
AT1G54560	gbM
AT1G54570	gbM
AT1G54590	gbM
AT1G54610	gbM
AT1G54650	gbM
AT1G54710	gbM
AT1G54770	gbM
AT1G54790	gbM
AT1G54830	gbM
AT1G54840	gbM
AT1G54850	gbM
AT1G54920	gbM
AT1G54930	gbM
AT1G54960	gbM
AT1G54990	gbM
AT1G55000	gbM
AT1G55020	gbM
AT1G55040	gbM
AT1G55050	gbM
AT1G55060	gbM
AT1G55090	gbM
AT1G55130	gbM
AT1G55140	gbM
AT1G55150	gbM
AT1G55170	gbM
AT1G55175	gbM
AT1G55180	gbM
AT1G55200	gbM
AT1G55220	gbM
AT1G55250	gbM
AT1G55270	gbM
AT1G55300	gbM
AT1G55310	gbM
AT1G55320	gbM
AT1G55325	gbM
AT1G55340	gbM
AT1G55350	gbM
AT1G55360	gbM
AT1G55390	gbM
AT1G55475	gbM
AT1G55480	gbM
AT1G55490	gbM
AT1G55500	gbM
AT1G55510	gbM
AT1G55535	gbM
AT1G55540	gbM
AT1G55560	gbM
AT1G55590	gbM
AT1G55610	gbM
AT1G55620	gbM
AT1G55680	gbM
AT1G55690	gbM
AT1G55720	gbM
AT1G55730	gbM
AT1G55740	gbM
AT1G55750	gbM
AT1G55790	gbM
AT1G55800	gbM
AT1G55803	gbM
AT1G55810	gbM
AT1G55820	gbM
AT1G55840	gbM
AT1G55850	gbM
AT1G55860	gbM
AT1G55865	gbM
AT1G55870	gbM
AT1G55880	gbM
AT1G55900	gbM
AT1G55915	gbM
AT1G55930	gbM
AT1G55940	gbM
AT1G55945	gbM
AT1G55960	gbM
AT1G55970	gbM
AT1G56000	gbM
AT1G56010	gbM
AT1G56050	gbM
AT1G56105	gbM
AT1G56110	gbM
AT1G56120	gbM
AT1G56130	gbM
AT1G56140	gbM
AT1G56145	gbM
AT1G56150	gbM
AT1G56180	gbM
AT1G56230	gbM
AT1G56260	gbM
AT1G56270	gbM
AT1G56280	gbM
AT1G56290	gbM
AT1G56300	gbM
AT1G56310	gbM
AT1G56320	gbM
AT1G56330	gbM
AT1G56340	gbM
AT1G56350	gbM
AT1G56420	gbM
AT1G56423	gbM
AT1G56430	gbM
AT1G56440	gbM
AT1G56450	gbM
AT1G56460	gbM
AT1G56500	gbM
AT1G56560	gbM
AT1G56570	gbM
AT1G56590	gbM
AT1G56690	gbM
AT1G56700	gbM
AT1G56710	gbM
AT1G56720	gbM
AT1G57590	gbM
AT1G57600	gbM
AT1G57620	gbM
[truncated: 14,028 more rows]
